# Supplementary material for: The Hematopoietic TALE-Code Shows Normal Activity of IRX1 in Myeloid Progenitors and Reveals Ectopic Expression of IRX3 and IRX5 in Acute Myeloid Leukemia
Source: MDPI journal article supplement (doi:10.3390/ijms23063192), 2022-03-16
Supplement: s1 [file s1]

| gene     | CMK      | M-07e    | MKPL-1    | UT-7     | OCI-AML3  | MEGAL    | IRX1       | IRX35      | IRX1-IRX35  |
|----------|----------|----------|-----------|----------|-----------|----------|------------|------------|-------------|
| ACTG1    | 223311,4 | 195232,3 | 203340,62 | 107478   | 582953,38 | 54097,98 | 182340,57  | 318525,68  | -136185,11  |
| CTSG     | 1,77     | 289,67   | 22,96     | 3,38     | 269981,04 | 27,96    | 79,445     | 135004,5   | -134925,055 |
| EEF2     | 187238,5 | 343697,2 | 117035,6  | 122441,9 | 481409,92 | 139799   | 192603,288 | 310604,435 | -118001,148 |
| TMSB4X   | 81648,53 | 71701,03 | 39238,17  | 39629,11 | 288980,69 | 35133,98 | 58054,21   | 162057,335 | -104003,125 |
| SRGN     | 21922,62 | 4772,76  | 20554,74  | 6478,63  | 160262,18 | 2639,78  | 13432,1875 | 81450,98   | -68018,7925 |
| NUP214   | 7062,72  | 9420,91  | 10963,74  | 6651,18  | 124576,92 | 13896,5  | 8524,6375  | 69236,71   | -60712,0725 |
| GAPDH    | 313436,1 | 299496,3 | 380097,24 | 211942,5 | 577973    | 144884,1 | 301243,035 | 361428,57  | -60185,535  |
| VIM      | 36691,45 | 67485,78 | 80245,62  | 53109,69 | 194598,9  | 37969,44 | 59383,135  | 116284,17  | -56901,035  |
| ZFP36L2  | 12593,51 | 21570,56 | 8441,19   | 28352,04 | 130472,95 | 14315,62 | 17739,325  | 72394,285  | -54654,96   |
| RPL37    | 44469,38 | 50700,52 | 151328,72 | 53360,76 | 233422,07 | 15194,34 | 74964,845  | 124308,205 | -49343,36   |
| IRF2BP2  | 24292,9  | 17892,97 | 15681,46  | 26842,12 | 120966,72 | 19142,75 | 21177,3625 | 70054,735  | -48877,3725 |
| NDRG1    | 335,13   | 11708,06 | 1752,64   | 4564,2   | 100229,19 | 726,46   | 4590,0075  | 50477,825  | -45887,8175 |
| RPL13    | 141573,6 | 159836   | 142575,15 | 132719,6 | 248888,84 | 127749,7 | 144176,09  | 188319,29  | -44143,2    |
| PABPC1   | 131408,7 | 128256,8 | 103102,1  | 101729,1 | 279922,48 | 33581,15 | 116124,17  | 156751,815 | -40627,645  |
| PLAC8    | 1589,34  | 967,13   | 2775,73   | 1291,84  | 81534,17  | 2166,96  | 1656,01    | 41850,565  | -40194,555  |
| IRF8     | 1,22     | 3,99     | 0         | 2,81     | 80286,41  | 0        | 2,005      | 40143,205  | -40141,2    |
| RPS24    | 59516,41 | 60919,59 | 65668,18  | 42124,09 | 152636,31 | 41029,89 | 57057,0675 | 96833,1    | -39776,0325 |
| RPS20    | 55872,51 | 60493,92 | 78893,66  | 41597,75 | 183201,38 | 14593,39 | 59214,46   | 98897,385  | -39682,925  |
| IRX3     | 0,8      | 12,28    | 5,81      | 0        | 56419,53  | 20277,02 | 4,7225     | 38348,275  | -38343,5525 |
| CDK6     | 19957,25 | 21927,26 | 23984,55  | 12394,89 | 8110,73   | 107564,1 | 19565,9875 | 57837,435  | -38271,4475 |
| RPL12    | 47984,23 | 79338,24 | 67530,07  | 46947,44 | 177074,61 | 18494,1  | 60449,995  | 97784,355  | -37334,36   |
| TOP2A    | 26909,86 | 31259,63 | 27427     | 30424,67 | 56040,13  | 75959,92 | 29005,29   | 66000,025  | -36994,735  |
| KIAA0930 | 3829,15  | 3215,76  | 1078,89   | 5103,72  | 76262,9   | 2400,55  | 3306,88    | 39331,725  | -36024,845  |
| MRC2     | 319,55   | 6807,71  | 2059,64   | 8720,13  | 74549,18  | 2564,94  | 4476,7575  | 38557,06   | -34080,3025 |
| SLC7A5   | 18506,09 | 21741,54 | 12652,51  | 13842,42 | 9553,78   | 89333,86 | 16685,64   | 49443,82   | -32758,18   |
| RPL41    | 71849,81 | 82056,07 | 113289,54 | 55009,55 | 198733,23 | 25538,26 | 80551,2425 | 112135,745 | -31584,5025 |
| PYGL     | 5639,92  | 4609,73  | 1637,41   | 1806,5   | 65059,66  | 4922,04  | 3423,39    | 34990,85   | -31567,46   |
| STK24    | 13573,32 | 11609,68 | 12937,54  | 12744,05 | 5426,76   | 83072,78 | 12716,1475 | 44249,77   | -31533,6225 |
| RPS3A    | 122926,4 | 121229,1 | 107001,2  | 165816,9 | 227120,07 | 92789,27 | 129243,395 | 159954,67  | -30711,275  |
| CAVIN1   | 297,89   | 7909,33  | 7331,86   | 13986,96 | 0         | 75769,77 | 7381,51    | 37884,885  | -30503,375  |
| SMC4     | 19849,53 | 15367,48 | 10203,65  | 12060,22 | 39995,45  | 48962,76 | 14370,22   | 44479,105  | -30108,885  |
| SRRM2    | 87505,5  | 74065,76 | 157825,54 | 71076,81 | 228385    | 25622,2  | 97618,4025 | 127003,6   | -29385,1975 |

|         |          |          |          |          |           |          |            |           |             |
|---------|----------|----------|----------|----------|-----------|----------|------------|-----------|-------------|
| RPL30   | 54652,35 | 42856,85 | 60142,88 | 36233,45 | 139763,28 | 11202,53 | 48471,3825 | 75482,905 | -27011,5225 |
| CXCL8   | 1245,17  | 121,15   | 129,86   | 1160,9   | 54684,4   | 99,36    | 664,27     | 27391,88  | -26727,61   |
| EIF3E   | 34673,04 | 36031,58 | 27136,52 | 25538,54 | 104817,28 | 9767,6   | 30844,92   | 57292,44  | -26447,52   |
| GRK2    | 27961,68 | 17396,74 | 40813,73 | 22670,13 | 90465,11  | 16301,77 | 27210,57   | 53383,44  | -26172,87   |
| IRS2    | 892,78   | 1946,22  | 2231,52  | 2655,82  | 34262,53  | 21667,86 | 1931,585   | 27965,195 | -26033,61   |
| BASP1   | 2689,23  | 116,5    | 626,41   | 707,46   | 54033,51  | 3,46     | 1034,9     | 27018,485 | -25983,585  |
| NUCKS1  | 50491,6  | 24611,33 | 22007,52 | 32702,64 | 52939,85  | 63649,16 | 32453,2725 | 58294,505 | -25841,2325 |
| CXCR4   | 71,03    | 156,85   | 280,97   | 31,65    | 49716,75  | 1256,76  | 135,125    | 25486,755 | -25351,63   |
| PGK1    | 74320,96 | 77247,98 | 63506,1  | 47964,19 | 157408,45 | 22963,34 | 65759,8075 | 90185,895 | -24426,0875 |
| RPS27   | 36548,42 | 38872,77 | 55953,17 | 43470,88 | 122282,38 | 13898,11 | 43711,31   | 68090,245 | -24378,935  |
| STT3B   | 15504,33 | 15317,78 | 11120,85 | 9869,31  | 20126,27  | 54520,47 | 12953,0675 | 37323,37  | -24370,3025 |
| LYST    | 843,26   | 235,48   | 371,56   | 488,88   | 48666,23  | 872,37   | 484,795    | 24769,3   | -24284,505  |
| SPTLC2  | 4970,13  | 5991,07  | 4085,25  | 5178,37  | 42894,82  | 15571,76 | 5056,205   | 29233,29  | -24177,085  |
| MEF2D   | 2143,08  | 3971,73  | 1463,04  | 2793,32  | 50731,1   | 2275,28  | 2592,7925  | 26503,19  | -23910,3975 |
| OGFRL1  | 1557,76  | 1336,67  | 293,05   | 1176,73  | 41824,92  | 7842,45  | 1091,0525  | 24833,685 | -23742,6325 |
| PPP1R27 | 2,89     | 2,27     | 4,15     | 5,53     | 46473,29  | 9,87     | 3,71       | 23241,58  | -23237,87   |
| LAMP5   | 0        | 0        | 0        | 0        | 46162,91  | 0        | 0          | 23081,455 | -23081,455  |
| RPL26   | 58827,92 | 62493,33 | 65266,3  | 43590,54 | 144448,28 | 16720,07 | 57544,5225 | 80584,175 | -23039,6525 |
| MDM4    | 5308,81  | 3468,45  | 3469,01  | 4394,31  | 47022,37  | 7285,65  | 4160,145   | 27154,01  | -22993,865  |
| CEBPA   | 796,43   | 47,52    | 7002,18  | 13,5     | 49181,08  | 643,12   | 1964,9075  | 24912,1   | -22947,1925 |
| NAP1L1  | 28000,23 | 47461,79 | 14734,62 | 33252,9  | 68747,47  | 37398,96 | 30862,385  | 53073,215 | -22210,83   |
| RPL9    | 75516    | 63079,91 | 52755,79 | 50828,78 | 130941,69 | 33835,35 | 60545,12   | 82388,52  | -21843,4    |
| IL17RA  | 11,55    | 1975,18  | 0        | 0        | 42448,63  | 1250,21  | 496,6825   | 21849,42  | -21352,7375 |
| RPL21   | 55941,13 | 51045,11 | 39038,38 | 38861,01 | 120328,61 | 14052,96 | 46221,4075 | 67190,785 | -20969,3775 |
| CITED2  | 13467,51 | 24385,85 | 6840,08  | 28398,62 | 71108,43  | 7285,31  | 18273,015  | 39196,87  | -20923,855  |
| GPX1    | 33633,15 | 19988,47 | 45707,15 | 21871,28 | 90843,31  | 11370,17 | 30300,0125 | 51106,74  | -20806,7275 |
| KCNAB2  | 9017,97  | 4269,58  | 2579,55  | 16730,49 | 43239,28  | 13723,2  | 8149,3975  | 28481,24  | -20331,8425 |
| RPL32   | 59616,74 | 57498,93 | 80844,52 | 39241,24 | 132543,68 | 26024,33 | 59300,3575 | 79284,005 | -19983,6475 |
| RPS15A  | 51669,13 | 52582,65 | 50435,4  | 46072,07 | 108240,16 | 31511,02 | 50189,8125 | 69875,59  | -19685,7775 |
| CD44    | 6655,19  | 15861,09 | 3226,57  | 5068,92  | 32940,42  | 21673,79 | 7702,9425  | 27307,105 | -19604,1625 |
| GRB2    | 10429,57 | 12628,13 | 14395,2  | 13108,98 | 53165,25  | 10493,33 | 12640,47   | 31829,29  | -19188,82   |
| BCL2    | 898,9    | 5840,09  | 632,82   | 2615,24  | 18973,06  | 24203,55 | 2496,7625  | 21588,305 | -19091,5425 |
| RPL23A  | 76701,83 | 69265,15 | 68521,17 | 46644,31 | 130148,24 | 38587,93 | 65283,115  | 84368,085 | -19084,97   |

|                 |          |          |           |          |           |          |            |            |             |
|-----------------|----------|----------|-----------|----------|-----------|----------|------------|------------|-------------|
| <b>TIMP3</b>    | 80276    | 8739,87  | 9007,79   | 30307,9  | 101826,44 | 36,7     | 32082,89   | 50931,57   | -18848,68   |
| <b>HMGB2</b>    | 41637,4  | 33133,46 | 26735,87  | 33670,28 | 51237,15  | 53967,94 | 33794,2525 | 52602,545  | -18808,2925 |
| <b>AZU1</b>     | 36,72    | 349,51   | 228,17    | 135,11   | 37687,97  | 194,15   | 187,3775   | 18941,06   | -18753,6825 |
| <b>PPIA</b>     | 98637,9  | 75669,16 | 131765,41 | 94856,41 | 179263,43 | 58647,88 | 100232,22  | 118955,655 | -18723,435  |
| <b>CEBPD</b>    | 586,94   | 428,47   | 1240,65   | 950,92   | 38394,38  | 1,75     | 801,745    | 19198,065  | -18396,32   |
| <b>LIPA</b>     | 4095,96  | 2843,5   | 1898,97   | 1553,74  | 3066,51   | 38684,36 | 2598,0425  | 20875,435  | -18277,3925 |
| <b>RPL36A</b>   | 41291,23 | 35445,82 | 56189,34  | 30648,88 | 100894,61 | 17292,21 | 40893,8175 | 59093,41   | -18199,5925 |
| <b>LAT2</b>     | 3329,8   | 5770,17  | 4625,72   | 2161,32  | 34522,24  | 8717,92  | 3971,7525  | 21620,08   | -17648,3275 |
| <b>TGFBR1</b>   | 2199,79  | 3124,42  | 1102,69   | 2369,58  | 29797,75  | 8984,97  | 2199,12    | 19391,36   | -17192,24   |
| <b>MICAL1</b>   | 879,57   | 1543,96  | 915,81    | 2243,32  | 25787,52  | 11291,38 | 1395,665   | 18539,45   | -17143,785  |
| <b>SATB1</b>    | 473,29   | 2005,42  | 3834,34   | 230,95   | 24820,23  | 12676,88 | 1636       | 18748,555  | -17112,555  |
| <b>IST1</b>     | 8966,95  | 10367,69 | 8459,77   | 6515,98  | 7383,9    | 43530,81 | 8577,5975  | 25457,355  | -16879,7575 |
| <b>ANXA6</b>    | 680,8    | 2510,32  | 2380,17   | 463,8    | 26638,3   | 9951,87  | 1508,7725  | 18295,085  | -16786,3125 |
| <b>CORO1A</b>   | 17992,11 | 10441,93 | 1690,79   | 23629,27 | 47225,08  | 12219,17 | 13438,525  | 29722,125  | -16283,6    |
| <b>CBFB</b>     | 4884,96  | 8578,76  | 2715,05   | 3449,78  | 5234,18   | 37130,29 | 4907,1375  | 21182,235  | -16275,0975 |
| <b>BAZ1A</b>    | 10317,57 | 9754,59  | 8758,45   | 7005,48  | 43705,74  | 6718,23  | 8959,0225  | 25211,985  | -16252,9625 |
| <b>RPL39</b>    | 24670,8  | 24131,57 | 40392,27  | 23451,15 | 75910,71  | 12513,83 | 28161,4475 | 44212,27   | -16050,8225 |
| <b>NPM1</b>     | 138658,1 | 113371   | 69243,55  | 94685,06 | 188318,36 | 51531,96 | 103989,415 | 119925,16  | -15935,745  |
| <b>MT2A</b>     | 758,66   | 5837,41  | 3697,44   | 1556,22  | 37119,36  | 420,38   | 2962,4325  | 18769,87   | -15807,4375 |
| <b>ZFR</b>      | 6504,57  | 7333,37  | 8139,51   | 8368,13  | 36364,84  | 10225,42 | 7586,395   | 23295,13   | -15708,735  |
| <b>ACTR2</b>    | 34963,13 | 34779,12 | 21759,46  | 41324    | 53594,89  | 44103,77 | 33206,4275 | 48849,33   | -15642,9025 |
| <b>DAP</b>      | 6583,18  | 6625,23  | 16282,67  | 9597,01  | 36769,56  | 13733,3  | 9772,0225  | 25251,43   | -15479,4075 |
| <b>ITGB2</b>    | 8173,87  | 4601,1   | 6091,05   | 6208,37  | 42960,63  | 128,48   | 6268,5975  | 21544,555  | -15275,9575 |
| <b>MYBPH</b>    | 1,81     | 0        | 0         | 0        | 30441,75  | 1,79     | 0,4525     | 15221,77   | -15221,3175 |
| <b>LPCAT1</b>   | 3985,83  | 990,18   | 3430,92   | 996,41   | 27245,24  | 7306,91  | 2350,835   | 17276,075  | -14925,24   |
| <b>CACNA2D4</b> | 1904,55  | 966,43   | 115,68    | 358,43   | 30920,99  | 581,78   | 836,2725   | 15751,385  | -14915,1125 |
| <b>CBX5</b>     | 11080,57 | 12976,71 | 7276,61   | 12994,14 | 12795,1   | 39110,2  | 11082,0075 | 25952,65   | -14870,6425 |
| <b>RPL35A</b>   | 34627,23 | 40731,51 | 50446,88  | 27516,7  | 92849,88  | 13521,75 | 38330,58   | 53185,815  | -14855,235  |
| <b>XPO1</b>     | 28375,06 | 20142,75 | 15181,32  | 24112,01 | 35954,16  | 37592,65 | 21952,785  | 36773,405  | -14820,62   |
| <b>PGAM1</b>    | 51055,56 | 45497,7  | 28630,44  | 25557,8  | 93648,57  | 11106,12 | 37685,375  | 52377,345  | -14691,97   |
| <b>CA2</b>      | 1348,16  | 2062,77  | 1046,15   | 7834,79  | 34573,61  | 1,62     | 3072,9675  | 17287,615  | -14214,6475 |
| <b>PLPPR3</b>   | 998,92   | 8172,29  | 1819,89   | 623,39   | 32931,47  | 816,9    | 2903,6225  | 16874,185  | -13970,5625 |
| <b>PRTN3</b>    | 0        | 402,61   | 12,12     | 5,66     | 28059,83  | 3,51     | 105,0975   | 14031,67   | -13926,5725 |

|                 |          |          |           |          |           |          |            |            |             |
|-----------------|----------|----------|-----------|----------|-----------|----------|------------|------------|-------------|
| <b>RAD21</b>    | 20875,2  | 16494,26 | 14479     | 17687,52 | 43561,49  | 19024,83 | 17383,995  | 31293,16   | -13909,165  |
| <b>FAM107B</b>  | 1301,76  | 1173,31  | 343,69    | 22,85    | 24331,1   | 4518,31  | 710,4025   | 14424,705  | -13714,3025 |
| <b>NAV3</b>     | 3,33     | 2,85     | 1,73      | 0        | 27385,38  | 4,62     | 1,9775     | 13695      | -13693,0225 |
| <b>RFLNB</b>    | 704,5    | 4830,09  | 2892,71   | 855,27   | 26707,95  | 5148,49  | 2320,6425  | 15928,22   | -13607,5775 |
| <b>PLEK</b>     | 9180,61  | 11080,61 | 849,45    | 1070,21  | 22340,34  | 15933,04 | 5545,22    | 19136,69   | -13591,47   |
| <b>RPL7</b>     | 146065,5 | 142989,9 | 129608,91 | 96253,1  | 249350,54 | 35054,69 | 128729,33  | 142202,615 | -13473,285  |
| <b>RXRA</b>     | 2177,81  | 328,56   | 1342,29   | 3803,16  | 24213,46  | 6400,45  | 1912,955   | 15306,955  | -13394      |
| <b>CAPG</b>     | 670,1    | 864,29   | 254,75    | 878,15   | 26770,73  | 1302,44  | 666,8225   | 14036,585  | -13369,7625 |
| <b>EDEM1</b>    | 4205,3   | 3921,53  | 2625,96   | 3987,51  | 30319,51  | 3703,62  | 3685,075   | 17011,565  | -13326,49   |
| <b>TOMM20</b>   | 33824,89 | 24900,25 | 19180,01  | 19660,97 | 56949,75  | 18337,77 | 24391,53   | 37643,76   | -13252,23   |
| <b>PREX1</b>    | 6328,55  | 14487,14 | 5562,2    | 1827,24  | 12232,48  | 28368,2  | 7051,2825  | 20300,34   | -13249,0575 |
| <b>HMGCS1</b>   | 15971,07 | 3640,23  | 4850,23   | 4241,17  | 7463,74   | 32656,18 | 7175,675   | 20059,96   | -12884,285  |
| <b>ELANE</b>    | 7,38     | 71,62    | 271,83    | 27,85    | 25890,84  | 0        | 94,67      | 12945,42   | -12850,75   |
| <b>RPL8</b>     | 108815   | 273390,5 | 167962,6  | 99293,64 | 323081,55 | 27235,8  | 162365,455 | 175158,675 | -12793,22   |
| <b>SERPINB8</b> | 0        | 0        | 68,37     | 0,82     | 25567,2   | 15,79    | 17,2975    | 12791,495  | -12774,1975 |
| <b>FOSL2</b>    | 753,28   | 1827,93  | 7048,21   | 1443,99  | 29534,83  | 1215,61  | 2768,3525  | 15375,22   | -12606,8675 |
| <b>DHX38</b>    | 6331,7   | 7620,62  | 8394,83   | 5486,53  | 11191,94  | 27834,89 | 6958,42    | 19513,415  | -12554,995  |
| <b>PTPRN2</b>   | 23,24    | 15,85    | 136,01    | 0        | 24999,33  | 133,55   | 43,775     | 12566,44   | -12522,665  |
| <b>SMC2</b>     | 8553,39  | 6746,78  | 3061,45   | 7007,5   | 7352,24   | 30370,72 | 6342,28    | 18861,48   | -12519,2    |
| <b>RHOA</b>     | 37311,14 | 32406,65 | 34454,78  | 27353,69 | 57489,7   | 33240,78 | 32881,565  | 45365,24   | -12483,675  |
| <b>CFD</b>      | 928,4    | 1734,79  | 1121,8    | 387,7    | 26954,9   | 12,74    | 1043,1725  | 13483,82   | -12440,6475 |
| <b>MT1X</b>     | 429,85   | 928,11   | 2066,3    | 567,32   | 26727,48  | 63,3     | 997,895    | 13395,39   | -12397,495  |
| <b>CBX3</b>     | 21020,27 | 20211,49 | 13973,68  | 17613,27 | 29569,01  | 31432,06 | 18204,6775 | 30500,535  | -12295,8575 |
| <b>MT1E</b>     | 2,8      | 434,21   | 22,52     | 150,86   | 24831,84  | 37,59    | 152,5975   | 12434,715  | -12282,1175 |
| <b>MKI67</b>    | 29550,64 | 25730,19 | 11587,53  | 20208,55 | 11204,19  | 56737,97 | 21769,2275 | 33971,08   | -12201,8525 |
| <b>BAHCC1</b>   | 877,98   | 6888,34  | 807,74    | 37,7     | 21358,95  | 7339     | 2152,94    | 14348,975  | -12196,035  |
| <b>IPO5</b>     | 38912,96 | 22779,07 | 27340,85  | 17329,18 | 11933,86  | 65625,11 | 26590,515  | 38779,485  | -12188,97   |
| <b>SYK</b>      | 5709,6   | 10299,32 | 6167,14   | 5530,8   | 17639,59  | 20482,12 | 6926,715   | 19060,855  | -12134,14   |
| <b>SDCBP</b>    | 4612,45  | 5251,1   | 6275,05   | 8717,79  | 27959,3   | 8594,22  | 6214,0975  | 18276,76   | -12062,6625 |
| <b>MED13L</b>   | 4387,87  | 7795,29  | 5350,51   | 10272,53 | 12490,75  | 25470,06 | 6951,55    | 18980,405  | -12028,855  |
| <b>HOMER3</b>   | 185,69   | 289,18   | 296,78    | 26,91    | 24347,83  | 106,66   | 199,64     | 12227,245  | -12027,605  |
| <b>VCAN</b>     | 13,6     | 158,28   | 80,88     | 102,96   | 24219,97  | 8,4      | 88,93      | 12114,185  | -12025,255  |
| <b>ARHGDIB</b>  | 28122,03 | 32542,08 | 70265,01  | 25505,73 | 67965,4   | 34052,76 | 39108,7125 | 51009,08   | -11900,3675 |

|          |          |          |           |          |           |          |            |            |             |
|----------|----------|----------|-----------|----------|-----------|----------|------------|------------|-------------|
| EIF3C    | 76740,94 | 58967,26 | 27613,35  | 52735,64 | 35497,02  | 96318,5  | 54014,2975 | 65907,76   | -11893,4625 |
| CYBA     | 16780,46 | 9797,72  | 14832,77  | 3271,65  | 24399,09  | 21664,7  | 11170,65   | 23031,895  | -11861,245  |
| ALDOA    | 183367,3 | 146769,7 | 133869,19 | 144394,4 | 252182,89 | 75629,92 | 152100,148 | 163906,405 | -11806,2575 |
| SCD      | 55949,94 | 40181,82 | 22935,02  | 12585,9  | 34241,75  | 55151,36 | 32913,17   | 44696,555  | -11783,385  |
| TNRC18   | 7177     | 17122,24 | 8788,42   | 13703,75 | 16391,13  | 30467,08 | 11697,8525 | 23429,105  | -11731,2525 |
| RCSD1    | 122,86   | 1256,01  | 2,06      | 367,39   | 15189,29  | 9028,44  | 437,08     | 12108,865  | -11671,785  |
| HLA-E    | 3020,43  | 22314,35 | 23690,8   | 8983,66  | 46655,36  | 5550,44  | 14502,31   | 26102,9    | -11600,59   |
| ANP32B   | 29916,99 | 28718    | 22629,22  | 29612,43 | 45007,68  | 33428,46 | 27719,16   | 39218,07   | -11498,91   |
| MSN      | 57276,99 | 85344,64 | 58135,83  | 78295,76 | 115917,5  | 46596,75 | 69763,305  | 81257,125  | -11493,82   |
| MBNL1    | 10489,46 | 11065,97 | 6609,22   | 11034,17 | 30579,6   | 11981,43 | 9799,705   | 21280,515  | -11480,81   |
| MATR3    | 28666,61 | 19672,43 | 18297,89  | 21172,05 | 27546,59  | 39300,69 | 21952,245  | 33423,64   | -11471,395  |
| ATP6V1B2 | 5381,23  | 5681,95  | 4417,1    | 5066,32  | 31096,81  | 2082,08  | 5136,65    | 16589,445  | -11452,795  |
| CYP51A1  | 6352,22  | 51,52    | 2042,7    | 3055,68  | 16888,2   | 11587,19 | 2875,53    | 14237,695  | -11362,165  |
| H1-10    | 10310,29 | 19877,05 | 6907,6    | 3935,35  | 22288,85  | 20830,75 | 10257,5725 | 21559,8    | -11302,2275 |
| PTPRC    | 17918,63 | 8503,61  | 10777,07  | 15779,1  | 34451,93  | 14495,48 | 13244,6025 | 24473,705  | -11229,1025 |
| ADGRA2   | 26,33    | 366,78   | 25,59     | 14,43    | 21881,92  | 708,68   | 108,2825   | 11295,3    | -11187,0175 |
| HLA-B    | 10514,55 | 20737,13 | 121235,5  | 2436,27  | 87329,55  | 12482,3  | 38730,8625 | 49905,925  | -11175,0625 |
| TOP2B    | 42675,71 | 39185,12 | 48796,72  | 19464,7  | 35234,38  | 62126,11 | 37530,5625 | 48680,245  | -11149,6825 |
| ZDHHC3   | 4694,28  | 4691,92  | 3544,68   | 2951,09  | 25538,62  | 4620,5   | 3970,4925  | 15079,56   | -11109,0675 |
| AP1G1    | 5977,64  | 5560,93  | 3797,65   | 4750,41  | 5114,06   | 27027,69 | 5021,6575  | 16070,875  | -11049,2175 |
| TPP2     | 17319,94 | 9254,31  | 16685,89  | 9124,98  | 13752,32  | 34437,3  | 13096,28   | 24094,81   | -10998,53   |
| UBC      | 56410,18 | 56237,63 | 42492,21  | 38433,57 | 74819,29  | 43953,11 | 48393,3975 | 59386,2    | -10992,8025 |
| SEPTIN7  | 11746,12 | 11465,2  | 7388,65   | 9569,78  | 17486,44  | 24558,74 | 10042,4375 | 21022,59   | -10980,1525 |
| YWHAB    | 22045,95 | 18374,89 | 20162,58  | 31165,5  | 27029,95  | 40728,1  | 22937,23   | 33879,025  | -10941,795  |
| MT1G     | 0        | 67,88    | 106,15    | 107,8    | 22002,45  | 0        | 70,4575    | 11001,225  | -10930,7675 |
| RPL37A   | 71675,85 | 72013,34 | 114762,82 | 60413,74 | 153449,68 | 27732,7  | 79716,4375 | 90591,19   | -10874,7525 |
| ARL8B    | 5004,58  | 4700,84  | 3240,38   | 3641,33  | 23243,08  | 6714,69  | 4146,7825  | 14978,885  | -10832,1025 |
| INSIG1   | 13705,6  | 5131,74  | 2508,72   | 2483,37  | 19647,97  | 13906,38 | 5957,3575  | 16777,175  | -10819,8175 |
| MYL12A   | 14080,12 | 10358,98 | 8195,61   | 12355,62 | 31727,37  | 12392,51 | 11247,5825 | 22059,94   | -10812,3575 |
| DHFR     | 9907,13  | 6979,62  | 3373,7    | 7773,22  | 8598,66   | 26968,6  | 7008,4175  | 17783,63   | -10775,2125 |
| ESYT2    | 5726,39  | 12705,55 | 5445,2    | 8416,49  | 18970,97  | 18701,19 | 8073,4075  | 18836,08   | -10762,6725 |
| NACA     | 57085,17 | 52778,12 | 70132,88  | 52620,87 | 114941,99 | 22769,32 | 58154,26   | 68855,655  | -10701,395  |
| ARHGAP45 | 7158,12  | 16337    | 11375,02  | 2969,74  | 32867,02  | 7384,02  | 9459,97    | 20125,52   | -10665,55   |



|                   |          |          |          |          |          |          |            |           |             |
|-------------------|----------|----------|----------|----------|----------|----------|------------|-----------|-------------|
| <b>SLC3A2</b>     | 12530,61 | 12797,49 | 14251,09 | 10804,46 | 21128,1  | 25285,16 | 12595,9125 | 23206,63  | -10610,7175 |
| <b>ZMIZ1</b>      | 10463,09 | 14408,28 | 12644,69 | 10928,51 | 2443,12  | 42866,31 | 12111,1425 | 22654,715 | -10543,5725 |
| <b>DOCK2</b>      | 11269,21 | 91,73    | 1305,07  | 11229,99 | 16321,69 | 16501,62 | 5974       | 16411,655 | -10437,655  |
| <b>RPS13</b>      | 44587,91 | 36898,93 | 38919,84 | 34595,66 | 78556,75 | 19775,55 | 38750,585  | 49166,15  | -10415,565  |
| <b>ANKRD13D</b>   | 2850,39  | 2022,04  | 2260,52  | 1825,39  | 23471,4  | 1821,66  | 2239,585   | 12646,53  | -10406,945  |
| <b>PRKAR1A</b>    | 9083,36  | 15465,89 | 5202,19  | 10781,43 | 19223    | 21457,28 | 10133,2175 | 20340,14  | -10206,9225 |
| <b>RNASE2</b>     | 3,54     | 3,02     | 0        | 0        | 20344,87 | 2,62     | 1,64       | 10173,745 | -10172,105  |
| <b>IQGAP1</b>     | 9775,58  | 13972,35 | 12233,24 | 16774,36 | 16787,01 | 29904,51 | 13188,8825 | 23345,76  | -10156,8775 |
| <b>RPL38</b>      | 21627,01 | 18468,8  | 38006,34 | 21468,69 | 62499,69 | 7554,33  | 24892,71   | 35027,01  | -10134,3    |
| <b>CST3</b>       | 5861,63  | 9271,06  | 11988,1  | 6982,83  | 31140,02 | 6145,15  | 8525,905   | 18642,585 | -10116,68   |
| <b>HMG2N1</b>     | 47067,92 | 32288,21 | 55527,86 | 25401,21 | 46720,85 | 53641,19 | 40071,3    | 50181,02  | -10109,72   |
| <b>XAGE1A</b>     | 8,8      | 0        | 0        | 0        | 20201,68 | 0        | 2,2        | 10100,84  | -10098,64   |
| <b>MYB</b>        | 17028,73 | 25002,29 | 19027,34 | 34680,03 | 36715,38 | 31319,67 | 23934,5975 | 34017,525 | -10082,9275 |
| <b>NNT</b>        | 7075,38  | 9352,73  | 8847,32  | 7064,03  | 23023,15 | 13155,89 | 8084,865   | 18089,52  | -10004,655  |
| <b>CALCOCO2</b>   | 1280,55  | 3705,33  | 2391,64  | 5291,27  | 12764,54 | 13443,71 | 3167,1975  | 13104,125 | -9936,9275  |
| <b>STAG2</b>      | 9019,01  | 9079,5   | 4093,57  | 8986,72  | 12796,59 | 22552,41 | 7794,7     | 17674,5   | -9879,8     |
| <b>PARVG</b>      | 2124,18  | 5435,21  | 3086,93  | 2234,5   | 19516,15 | 6564,59  | 3220,205   | 13040,37  | -9820,165   |
| <b>PTPN6</b>      | 11099,05 | 15464,91 | 10652,56 | 16404,45 | 39503,62 | 6893,51  | 13405,2425 | 23198,565 | -9793,3225  |
| <b>P2RY2</b>      | 842,99   | 55,25    | 500,82   | 127,75   | 20096,94 | 20,66    | 381,7025   | 10058,8   | -9677,0975  |
| <b>TMEM121B</b>   | 0        | 8,44     | 0        | 0        | 18881,39 | 454,09   | 2,11       | 9667,74   | -9665,63    |
| <b>EIF4A2</b>     | 22637,16 | 15020,61 | 16404    | 17200,24 | 40227,14 | 14722,99 | 17815,5025 | 27475,065 | -9659,5625  |
| <b>MYLIP</b>      | 1319,48  | 1598,86  | 2686,91  | 2637,51  | 22118,32 | 1214,55  | 2060,69    | 11666,435 | -9605,745   |
| <b>SLC38A1</b>    | 108,39   | 11528,93 | 1837,92  | 99,71    | 76       | 25915,72 | 3393,7375  | 12995,86  | -9602,1225  |
| <b>WDFY1</b>      | 1677,13  | 2507,21  | 1298,34  | 1545,09  | 17721,19 | 4988,34  | 1756,9425  | 11354,765 | -9597,8225  |
| <b>PALM2AKAP2</b> | 8493,87  | 457,74   | 2654,56  | 17677,43 | 10149,21 | 23650,32 | 7320,9     | 16899,765 | -9578,865   |
| <b>MYBL2</b>      | 11997,47 | 19157,17 | 9826,95  | 16520,81 | 8267,42  | 39628,52 | 14375,6    | 23947,97  | -9572,37    |
| <b>CHD9</b>       | 4460,68  | 5516,1   | 3608,94  | 3117,82  | 5611,78  | 21720,49 | 4175,885   | 13666,135 | -9490,25    |
| <b>DMXL2</b>      | 1008,94  | 885,69   | 350,94   | 6,63     | 15019,68 | 4976,67  | 563,05     | 9998,175  | -9435,125   |
| <b>TM9SF2</b>     | 14587,75 | 8302,76  | 20545,44 | 11641,07 | 6485,54  | 39804,54 | 13769,255  | 23145,04  | -9375,785   |
| <b>TRIP6</b>      | 55,63    | 73,41    | 44,65    | 148,18   | 18771,02 | 86,3     | 80,4675    | 9428,66   | -9348,1925  |
| <b>NEK7</b>       | 3975,12  | 1860,48  | 1304,7   | 1948,89  | 17439,44 | 5793,58  | 2272,2975  | 11616,51  | -9344,2125  |
| <b>MARCHF6</b>    | 6635,33  | 10754,96 | 14527,9  | 7694     | 24916,79 | 13459,23 | 9903,0475  | 19188,01  | -9284,9625  |
| <b>HK2</b>        | 11276,83 | 9719,84  | 4153,27  | 10980,68 | 31158,53 | 5476,19  | 9032,655   | 18317,36  | -9284,705   |

|          |          |          |          |          |          |          |            |           |            |
|----------|----------|----------|----------|----------|----------|----------|------------|-----------|------------|
| PTK2B    | 4496,78  | 9845,87  | 2759,95  | 10071,8  | 30403,1  | 1596,74  | 6793,6     | 15999,92  | -9206,32   |
| TLR2     | 14,46    | 10,79    | 5,34     | 7,21     | 18309,24 | 0        | 9,45       | 9154,62   | -9145,17   |
| OAZ1     | 54194    | 43598,4  | 51104,91 | 29941,34 | 77725,43 | 29769,09 | 44709,6625 | 53747,26  | -9037,5975 |
| PTEN     | 5632,7   | 7470,54  | 5389,27  | 3401,1   | 19974,39 | 9029,71  | 5473,4025  | 14502,05  | -9028,6475 |
| CES1     | 16,91    | 89,69    | 29,67    | 268,52   | 18256,63 | 0,91     | 101,1975   | 9128,77   | -9027,5725 |
| UBAC2    | 6279,81  | 5080,67  | 12432,47 | 5622,58  | 9165,85  | 23478,45 | 7353,8825  | 16322,15  | -8968,2675 |
| CGGBP1   | 3974,19  | 8878,84  | 3436,51  | 6478,13  | 8087,51  | 21194,84 | 5691,9175  | 14641,175 | -8949,2575 |
| XPO6     | 9272,19  | 12068,9  | 8830,6   | 8825,67  | 16088,22 | 21277,17 | 9749,34    | 18682,695 | -8933,355  |
| SNTA1    | 211,26   | 6276,92  | 178,15   | 177,81   | 293,58   | 20952,21 | 1711,035   | 10622,895 | -8911,86   |
| RBM39    | 20879,38 | 20527,71 | 16803,94 | 32571,15 | 24212,75 | 38990,59 | 22695,545  | 31601,67  | -8906,125  |
| P4HA1    | 10043,98 | 6098,37  | 4780,17  | 5387,35  | 28340,55 | 2591,52  | 6577,4675  | 15466,035 | -8888,5675 |
| FANCI    | 9721,39  | 10079,38 | 6116,43  | 7636,4   | 4079,18  | 30422,61 | 8388,4     | 17250,895 | -8862,495  |
| ARHGAP30 | 4197,63  | 7105     | 4972,62  | 8860,29  | 18675,41 | 11545,39 | 6283,885   | 15110,4   | -8826,515  |
| ZC3H11A  | 17308,26 | 11311,22 | 10929,9  | 15163,74 | 23115,19 | 21857,09 | 13678,28   | 22486,14  | -8807,86   |
| MNDA     | 3,33     | 0        | 36,35    | 0        | 17623,57 | 0        | 9,92       | 8811,785  | -8801,865  |
| ATP11A   | 3921,7   | 8339,8   | 4009,14  | 5360,8   | 4751,13  | 23654,88 | 5407,86    | 14203,005 | -8795,145  |
| FNBP1    | 2493,75  | 3982,13  | 7685,47  | 2469,49  | 11898,83 | 14003,3  | 4157,71    | 12951,065 | -8793,355  |
| DOCK10   | 88,74    | 7,36     | 613,81   | 3,38     | 12374,52 | 5540,49  | 178,3225   | 8957,505  | -8779,1825 |
| HNRNPK   | 37626,71 | 54039,9  | 38194,7  | 46268,82 | 51422,17 | 54088,71 | 44032,5325 | 52755,44  | -8722,9075 |
| SFMBT2   | 271,2    | 3387     | 20,19    | 4,12     | 15104,21 | 4153,79  | 920,6275   | 9629      | -8708,3725 |
| FUS      | 25601,63 | 35227,73 | 29755,75 | 38609,93 | 40905,54 | 40883,65 | 32298,76   | 40894,595 | -8595,835  |
| CD74     | 3959,32  | 25,61    | 28,77    | 9350,94  | 8799,41  | 14978,26 | 3341,16    | 11888,835 | -8547,675  |
| SUB1     | 14822,81 | 12178,85 | 28253,76 | 16706,73 | 42727,68 | 10329,43 | 17990,5375 | 26528,555 | -8538,0175 |
| LTA4H    | 5840,67  | 6437,05  | 9060,15  | 4028,89  | 25889,14 | 3812,96  | 6341,69    | 14851,05  | -8509,36   |
| ANKRD10  | 6632,85  | 4497,66  | 14977,21 | 3999,17  | 3808,73  | 28214,13 | 7526,7225  | 16011,43  | -8484,7075 |
| SREBF2   | 19241,56 | 21851,2  | 12623,78 | 15941,51 | 20448,29 | 31324,59 | 17414,5125 | 25886,44  | -8471,9275 |
| PANK3    | 7857,34  | 4978,33  | 2735,25  | 5625,2   | 9539,93  | 17900,46 | 5299,03    | 13720,195 | -8421,165  |
| PIK3AP1  | 2521,11  | 5206,77  | 283,42   | 6852,02  | 13451,99 | 10722,59 | 3715,83    | 12087,29  | -8371,46   |
| HSPA1A   | 235,24   | 0        | 1303,5   | 14253,21 | 19900,43 | 4738,06  | 3947,9875  | 12319,245 | -8371,2575 |
| TMEM123  | 20664,49 | 16568,68 | 11815,85 | 15743,57 | 20183,35 | 28918,74 | 16198,1475 | 24551,045 | -8352,8975 |
| ANKRD11  | 17160,91 | 17348,89 | 13852,87 | 11433,57 | 10987,95 | 35516,02 | 14949,06   | 23251,985 | -8302,925  |
| MMP14    | 472,31   | 9148,5   | 1861,35  | 427,85   | 22365,52 | 158,22   | 2977,5025  | 11261,87  | -8284,3675 |
| CCR1     | 22,1     | 127,48   | 3,67     | 0        | 16596,94 | 30,58    | 38,3125    | 8313,76   | -8275,4475 |

|         |          |          |           |          |           |          |            |           |            |
|---------|----------|----------|-----------|----------|-----------|----------|------------|-----------|------------|
| ATXN1L  | 2160,35  | 3658,58  | 1688,79   | 2236,07  | 1701,88   | 19717,51 | 2435,9475  | 10709,695 | -8273,7475 |
| LGALS1  | 3127,76  | 26500,39 | 20226,38  | 28133,29 | 40347,49  | 15144,1  | 19496,955  | 27745,795 | -8248,84   |
| TMPO    | 19833,73 | 20000,32 | 6895,49   | 15278,2  | 11324,7   | 36085,38 | 15501,935  | 23705,04  | -8203,105  |
| HOXA10  | 1504,76  | 16,68    | 2365,47   | 1,69     | 13228,53  | 5088,52  | 972,15     | 9158,525  | -8186,375  |
| TMC8    | 7522,57  | 4909,88  | 12560,91  | 7570,88  | 16839,56  | 15777,91 | 8141,06    | 16308,735 | -8167,675  |
| AK2     | 21513,22 | 22197,02 | 25700,67  | 35382,43 | 52829,38  | 15870,71 | 26198,335  | 34350,045 | -8151,71   |
| MS4A3   | 10998,15 | 609,57   | 8504,38   | 585,53   | 26545,5   | 31,77    | 5174,4075  | 13288,635 | -8114,2275 |
| SF3B3   | 20948,91 | 26654,3  | 15364,02  | 21260,4  | 15717,09  | 42569,3  | 21056,9075 | 29143,195 | -8086,2875 |
| MTPN    | 14794,13 | 12778,32 | 8577,56   | 14268,09 | 20967,59  | 20363,5  | 12604,525  | 20665,545 | -8061,02   |
| FTL     | 99880,04 | 102584,4 | 161066,76 | 155119,2 | 253836,67 | 21519,31 | 129662,618 | 137677,99 | -8015,3725 |
| SEC23B  | 5634,65  | 3863,42  | 5675,73   | 6949,43  | 21152,33  | 5920,48  | 5530,8075  | 13536,405 | -8005,5975 |
| CPNE1   | 10299,46 | 6058,92  | 10128,54  | 13975,73 | 12910,8   | 23143,95 | 10115,6625 | 18027,375 | -7911,7125 |
| SLC44A1 | 4899,85  | 2047,77  | 2437,49   | 4725,92  | 1246,58   | 21626,05 | 3527,7575  | 11436,315 | -7908,5575 |
| NCF1    | 658,51   | 132,38   | 91,71     | 209,03   | 16298     | 57,82    | 272,9075   | 8177,91   | -7905,0025 |
| FDPS    | 14503,07 | 12259,28 | 10381,3   | 9981,19  | 23539,87  | 15772,57 | 11781,21   | 19656,22  | -7875,01   |
| ABCC1   | 10373,96 | 14693,69 | 10498,12  | 10409,96 | 2652,69   | 36059,58 | 11493,9325 | 19356,135 | -7862,2025 |
| ANP32E  | 13167,33 | 12290,08 | 9688,53   | 12947,91 | 26096,73  | 13674,08 | 12023,4625 | 19885,405 | -7861,9425 |
| MXI1    | 665,26   | 1485,75  | 698,09    | 2481,24  | 16606,49  | 1777,2   | 1332,585   | 9191,845  | -7859,26   |
| TUBGCP3 | 10386,45 | 3759,58  | 8961,11   | 4695,3   | 6029,04   | 23544,19 | 6950,61    | 14786,615 | -7836,005  |
| COL2A1  | 206,39   | 106,16   | 3261,29   | 2,45     | 0         | 17420,61 | 894,0725   | 8710,305  | -7816,2325 |
| EDEM3   | 5540,4   | 2463,32  | 3778,44   | 3752,64  | 17565,21  | 5828,79  | 3883,7     | 11697     | -7813,3    |
| RPL15   | 96443,38 | 105685,1 | 80463,74  | 61347,09 | 131967,28 | 55560,37 | 85984,8225 | 93763,825 | -7779,0025 |
| RNASET2 | 732,45   | 5201,86  | 4403,07   | 10876,11 | 24944,08  | 1189     | 5303,3725  | 13066,54  | -7763,1675 |
| OTULINL | 154,69   | 107,12   | 395,8     | 185,68   | 13188,67  | 2728,91  | 210,8225   | 7958,79   | -7747,9675 |
| BTF3    | 40961,94 | 36110,97 | 32718,7   | 36498,19 | 66978,05  | 21627,42 | 36572,45   | 44302,735 | -7730,285  |
| GNA13   | 5077,54  | 4624,24  | 2340,88   | 5496,93  | 12701,91  | 11527,67 | 4384,8975  | 12114,79  | -7729,8925 |
| SLC1A4  | 1501,84  | 1448,18  | 1797,19   | 2685,56  | 10460,34  | 8657,36  | 1858,1925  | 9558,85   | -7700,6575 |
| TUBA1A  | 890,52   | 2110,64  | 14616,19  | 4800,48  | 3987,1    | 22529,16 | 5604,4575  | 13258,13  | -7653,6725 |
| NREP    | 9648     | 11619,11 | 5463,19   | 2527,98  | 8212,63   | 21664,7  | 7314,57    | 14938,665 | -7624,095  |
| DHRS9   | 7965,44  | 0        | 5416,97   | 45,69    | 21939,09  | 2,51     | 3357,025   | 10970,8   | -7613,775  |
| B3GNT2  | 8900,25  | 7128,11  | 3639,38   | 4063,6   | 14768,71  | 12317,88 | 5932,835   | 13543,295 | -7610,46   |
| PIK3CG  | 1161,76  | 1968,54  | 1571,38   | 1407,32  | 15444     | 2817,23  | 1527,25    | 9130,615  | -7603,365  |
| NIPBL   | 7799,38  | 5964,34  | 11496,84  | 7064,32  | 21597,32  | 9653,61  | 8081,22    | 15625,465 | -7544,245  |



|          |          |          |          |          |          |          |            |           |            |
|----------|----------|----------|----------|----------|----------|----------|------------|-----------|------------|
| ETV6     | 7617,86  | 5691,4   | 14572,63 | 5477,99  | 12822,71 | 18933,7  | 8339,97    | 15878,205 | -7538,235  |
| DDX17    | 30314,62 | 34588,47 | 20065,91 | 31207,66 | 26231,88 | 46834,02 | 29044,165  | 36532,95  | -7488,785  |
| HDHD5    | 0        | 4141,24  | 13,36    | 0        | 15455,19 | 1564     | 1038,65    | 8509,595  | -7470,945  |
| CDC42EP3 | 3125,72  | 2005,54  | 1393     | 632,06   | 15674,38 | 2822,37  | 1789,08    | 9248,375  | -7459,295  |
| PRR11    | 5569,73  | 5883,77  | 5168,4   | 5565,57  | 16377,09 | 9616,65  | 5546,8675  | 12996,87  | -7450,0025 |
| MT-ATP8  | 21630,04 | 31802,53 | 24370,35 | 21544,81 | 17226,57 | 47330,77 | 24836,9325 | 32278,67  | -7441,7375 |
| RNH1     | 13786,07 | 12840,58 | 20106,22 | 20248,53 | 45641,94 | 2725,03  | 16745,35   | 24183,485 | -7438,135  |
| HMGCR    | 10607,34 | 5545,98  | 2949,06  | 4667,59  | 8312,63  | 18355,91 | 5942,4925  | 13334,27  | -7391,7775 |
| HIPK3    | 2129,29  | 1355,68  | 1342,65  | 1953,89  | 14191,15 | 3968,17  | 1695,3775  | 9079,66   | -7384,2825 |
| PCM1     | 13224,48 | 13149,6  | 15153,22 | 12938,34 | 32805,23 | 9107,38  | 13616,41   | 20956,305 | -7339,895  |
| CCNI     | 19789,12 | 19740,11 | 16028,71 | 23785,05 | 31400,54 | 22851,52 | 19835,7475 | 27126,03  | -7290,2825 |
| TASOR    | 2644,25  | 3957,18  | 2070,68  | 2999,5   | 5317,27  | 15062,65 | 2917,9025  | 10189,96  | -7272,0575 |
| ACSL1    | 1869,56  | 789,69   | 573,05   | 5215,46  | 17920,8  | 841,93   | 2111,94    | 9381,365  | -7269,425  |
| LRRFIP1  | 4162,72  | 7918,12  | 2894,25  | 3984,53  | 11642,67 | 12368,48 | 4739,905   | 12005,575 | -7265,67   |
| CDK1     | 8968,4   | 5669,33  | 2007,2   | 4600,42  | 8790,13  | 16347,08 | 5311,3375  | 12568,605 | -7257,2675 |
| LYZ      | 4346,41  | 2750,47  | 11937,71 | 4711,31  | 22728,69 | 3643,99  | 5936,475   | 13186,34  | -7249,865  |
| C12orf75 | 80,52    | 133,82   | 345,57   | 913,91   | 9992,63  | 5233,71  | 368,455    | 7613,17   | -7244,715  |
| TRPM2    | 31,28    | 246,07   | 17,29    | 1,4      | 14590,34 | 17,54    | 74,01      | 7303,94   | -7229,93   |
| WNK1     | 7610,06  | 14068,51 | 5815,89  | 9201,81  | 6724,58  | 26072,45 | 9174,0675  | 16398,515 | -7224,4475 |
| CKAP4    | 25,99    | 181,86   | 251,09   | 8,82     | 12885,01 | 1746,91  | 116,94     | 7315,96   | -7199,02   |
| CD37     | 1256,75  | 1194,02  | 329,39   | 2792,94  | 12978,12 | 4199,99  | 1393,275   | 8589,055  | -7195,78   |
| HOXA9    | 30,69    | 0        | 508,9    | 1,95     | 10089,38 | 4557,01  | 135,385    | 7323,195  | -7187,81   |
| QSOX1    | 6809,81  | 4469,07  | 15477,2  | 9681,42  | 27587,77 | 4976,48  | 9109,375   | 16282,125 | -7172,75   |
| HILPDA   | 1235,12  | 1422,34  | 887,27   | 848,68   | 15700,01 | 789,91   | 1098,3525  | 8244,96   | -7146,6075 |
| NUP205   | 16632,97 | 11843,17 | 10327,36 | 9565,52  | 26176,6  | 12267,09 | 12092,255  | 19221,845 | -7129,59   |
| SPIN1    | 2292,94  | 5538,42  | 2109,38  | 2496,02  | 4260,12  | 16138,39 | 3109,19    | 10199,255 | -7090,065  |
| TBC1D5   | 4591,39  | 4369,98  | 1689,36  | 2781,84  | 7627,03  | 13267,55 | 3358,1425  | 10447,29  | -7089,1475 |
| BMI1     | 2628,88  | 2443,74  | 2303,21  | 4324,79  | 1327,18  | 18695,63 | 2925,155   | 10011,405 | -7086,25   |
| KMT2C    | 5135,57  | 4216,69  | 3421,8   | 4507,82  | 12735,74 | 10074,19 | 4320,47    | 11404,965 | -7084,495  |
| RAD23B   | 13438,09 | 13534,08 | 6644,88  | 17920,39 | 16337,87 | 23599,6  | 12884,36   | 19968,735 | -7084,375  |
| HIP1     | 460,15   | 138,29   | 775,13   | 1252,17  | 13413,01 | 2011,38  | 656,435    | 7712,195  | -7055,76   |
| ATG16L2  | 3769,83  | 2567,75  | 2698,03  | 6680,49  | 16309,46 | 5623,8   | 3929,025   | 10966,63  | -7037,605  |
| ANKRD12  | 4784,44  | 3672,14  | 3747,43  | 5073,4   | 16906,49 | 5804,3   | 4319,3525  | 11355,395 | -7036,0425 |

|          |          |          |          |          |          |          |            |           |            |
|----------|----------|----------|----------|----------|----------|----------|------------|-----------|------------|
| EIF3H    | 16943,89 | 18736,83 | 16996,14 | 14838,77 | 41308,48 | 6499,65  | 16878,9075 | 23904,065 | -7025,1575 |
| NCOA4    | 19532,61 | 21221,05 | 8516,06  | 20297,93 | 31183,66 | 17630,13 | 17391,9125 | 24406,895 | -7014,9825 |
| TGOLN2   | 11598,73 | 13739,7  | 11284,53 | 14504,05 | 22683,64 | 16872,8  | 12781,7525 | 19778,22  | -6996,4675 |
| ATXN2L   | 18653,49 | 16902,2  | 17487,01 | 19486,8  | 19738,25 | 30514,93 | 18132,375  | 25126,59  | -6994,215  |
| TPX2     | 16416,33 | 15766,13 | 11208,9  | 21361,7  | 11884,41 | 34428,57 | 16188,265  | 23156,49  | -6968,225  |
| RPS15    | 51080    | 55584,96 | 34887,45 | 20675,76 | 72309,94 | 22734,9  | 40557,0425 | 47522,42  | -6965,3775 |
| RUNX2    | 4,57     | 90,53    | 85,94    | 62,17    | 13441,12 | 529,93   | 60,8025    | 6985,525  | -6924,7225 |
| NCAPG2   | 6270,24  | 5046,02  | 3351,57  | 4643,35  | 11900,8  | 11592,79 | 4827,795   | 11746,795 | -6919      |
| CHSY1    | 2884,71  | 4424,37  | 10239,41 | 3673,36  | 15033,37 | 9300,37  | 5305,4625  | 12166,87  | -6861,4075 |
| CNTRL    | 5281,78  | 6922,98  | 5309,6   | 4861,08  | 4747,82  | 20147,51 | 5593,86    | 12447,665 | -6853,805  |
| SMC3     | 13735,56 | 9289,79  | 4694,45  | 7319,27  | 12000,78 | 19167,89 | 8759,7675  | 15584,335 | -6824,5675 |
| MYCN     | 294,28   | 2260,78  | 14,13    | 133,41   | 1,34     | 14998,98 | 675,65     | 7500,16   | -6824,51   |
| ATP8B4   | 159,56   | 216,42   | 190,53   | 184,81   | 13611,74 | 318,86   | 187,83     | 6965,3    | -6777,47   |
| RBL2     | 3588,99  | 4724,94  | 1897,13  | 2770,72  | 6463,86  | 13580,91 | 3245,445   | 10022,385 | -6776,94   |
| LRRC75A  | 6987,41  | 8409,29  | 13092,2  | 4259,36  | 26031,71 | 3848,52  | 8187,065   | 14940,115 | -6753,05   |
| HOXA13   | 1,77     | 0        | 4,59     | 0        | 11429,88 | 1993,16  | 1,59       | 6711,52   | -6709,93   |
| MAZ      | 29475,75 | 43800,71 | 17155,4  | 33512,12 | 35312,33 | 40075,32 | 30985,995  | 37693,825 | -6707,83   |
| UHRF2    | 2078,07  | 3955,02  | 1977,57  | 3316,96  | 13164,75 | 5884,91  | 2831,905   | 9524,83   | -6692,925  |
| DYNC1LI2 | 2602,37  | 3115     | 3450,33  | 3336,22  | 4356,91  | 15265,69 | 3125,98    | 9811,3    | -6685,32   |
| CAPRIN1  | 19675,76 | 13697,51 | 13036,68 | 23048,35 | 22127,75 | 25971,99 | 17364,575  | 24049,87  | -6685,295  |
| HNRNPDL  | 41703,84 | 31083,68 | 28554,21 | 21021,12 | 48833,35 | 25712,5  | 30590,7125 | 37272,925 | -6682,2125 |
| ZNF395   | 4129,96  | 8164,32  | 3125,17  | 5291,83  | 19825,75 | 3889,4   | 5177,82    | 11857,575 | -6679,755  |
| XYLT1    | 1141,17  | 2804,66  | 483,04   | 760,74   | 2046,05  | 13895,32 | 1297,4025  | 7970,685  | -6673,2825 |
| LBR      | 16157,65 | 9612,01  | 5809,87  | 10719,15 | 13166,68 | 21309,58 | 10574,67   | 17238,13  | -6663,46   |
| CHD2     | 7025,37  | 8751,49  | 8283,02  | 9119,84  | 15425,84 | 14468,11 | 8294,93    | 14946,975 | -6652,045  |
| CD93     | 154,69   | 586,13   | 242,44   | 25,88    | 11115,52 | 2692,21  | 252,285    | 6903,865  | -6651,58   |
| ATP13A3  | 7732,32  | 9381,01  | 2902,93  | 9723,43  | 8107,79  | 20051,12 | 7434,9225  | 14079,455 | -6644,5325 |
| IRX5     | 162,38   | 223,34   | 61,02    | 181,44   | 9286,03  | 4235,04  | 157,045    | 6760,535  | -6603,49   |
| SUMO2    | 19241,37 | 15212,33 | 17421,75 | 15248,85 | 29839,58 | 16925,85 | 16781,075  | 23382,715 | -6601,64   |
| MEF2A    | 2395,69  | 2365,31  | 1499,47  | 1686,38  | 1597,83  | 15481,34 | 1986,7125  | 8539,585  | -6552,8725 |
| CCL5     | 77,12    | 185,04   | 179,75   | 31,14    | 13300,67 | 21,4     | 118,2625   | 6661,035  | -6542,7725 |
| CHST11   | 3248,79  | 20002,03 | 2988,38  | 5419,6   | 11661,2  | 17203,74 | 7914,7     | 14432,47  | -6517,77   |
| CSTA     | 1,78     | 4,55     | 22,16    | 10,18    | 13051,79 | 1,52     | 9,6675     | 6526,655  | -6516,9875 |

|          |          |          |           |          |           |          |            |           |            |
|----------|----------|----------|-----------|----------|-----------|----------|------------|-----------|------------|
| ENO2     | 2915,35  | 2376,52  | 2225,44   | 2636,82  | 9746,26   | 8363,54  | 2538,5325  | 9054,9    | -6516,3675 |
| SET      | 51823,5  | 39469,69 | 25201,1   | 39508,73 | 39886,64  | 51131,85 | 39000,755  | 45509,245 | -6508,49   |
| RBM33    | 5129,81  | 6093,89  | 3428,03   | 4896,78  | 14482,71  | 8170,89  | 4887,1275  | 11326,8   | -6439,6725 |
| GNAS     | 57850,34 | 48296,1  | 72790,63  | 47652,6  | 39923,66  | 86180,74 | 56647,4175 | 63052,2   | -6404,7825 |
| CHD6     | 1398,54  | 4419,89  | 2640,44   | 4796,76  | 5719,85   | 13713,26 | 3313,9075  | 9716,555  | -6402,6475 |
| BMP2     | 7,96     | 6424,02  | 21,12     | 818,13   | 16310,59  | 51,55    | 1817,8075  | 8181,07   | -6363,2625 |
| CTNNAL1  | 3007,56  | 1563,66  | 1866,73   | 2234,14  | 10099,15  | 6954,95  | 2168,0225  | 8527,05   | -6359,0275 |
| IGF2BP2  | 11,2     | 3176,97  | 1605,47   | 0        | 8886,74   | 6223,76  | 1198,41    | 7555,25   | -6356,84   |
| C1orf43  | 15579,58 | 13375,51 | 15809,41  | 14411,04 | 32638,09  | 9631,43  | 14793,885  | 21134,76  | -6340,875  |
| IGF2R    | 360,58   | 8977,76  | 2352,79   | 5394,76  | 11508,06  | 9687,64  | 4271,4725  | 10597,85  | -6326,3775 |
| ASPM     | 11683,48 | 6203,53  | 4109      | 7485,81  | 9406,41   | 17942,59 | 7370,455   | 13674,5   | -6304,045  |
| RNF166   | 3029,24  | 3219,43  | 2482,4    | 2463,04  | 8305,9    | 9842,64  | 2798,5275  | 9074,27   | -6275,7425 |
| PPP1CC   | 18356,48 | 15729,76 | 9052,14   | 18606,08 | 25713,11  | 17680,54 | 15436,115  | 21696,825 | -6260,71   |
| CMTM6    | 6910,65  | 4117,23  | 3179,22   | 2214,69  | 4986,4    | 15739,06 | 4105,4475  | 10362,73  | -6257,2825 |
| UHMK1    | 8774,21  | 4907,55  | 3571,28   | 10251,19 | 14733,77  | 11485,41 | 6876,0575  | 13109,59  | -6233,5325 |
| APEX1    | 18609,21 | 23278,5  | 12265,42  | 11794,32 | 31519,22  | 13846,42 | 16486,8625 | 22682,82  | -6195,9575 |
| SMYD3    | 2455,73  | 1751,18  | 3223,24   | 1983,52  | 14644,06  | 2444,21  | 2353,4175  | 8544,135  | -6190,7175 |
| TNFRSF1B | 383,12   | 562,3    | 203,09    | 555,53   | 13096,08  | 119,92   | 426,01     | 6608      | -6181,99   |
| KIF5B    | 13135,37 | 10932    | 9821,42   | 10188,91 | 14514,76  | 19826,74 | 11019,425  | 17170,75  | -6151,325  |
| CEP20    | 3905,63  | 2585,1   | 2617,81   | 4157,22  | 6644,02   | 12272,87 | 3316,44    | 9458,445  | -6142,005  |
| PPDPF    | 2400,11  | 3665,56  | 6726,07   | 2230,91  | 12958,95  | 6809,23  | 3755,6625  | 9884,09   | -6128,4275 |
| RNASE1   | 2187,48  | 1393,28  | 2919,87   | 290,9    | 15616,27  | 1,92     | 1697,8825  | 7809,095  | -6111,2125 |
| NAE1     | 7151,45  | 5180,29  | 3385,99   | 5267,42  | 4824,35   | 17889,19 | 5246,2875  | 11356,77  | -6110,4825 |
| BTG1     | 1189,78  | 647,98   | 1831,13   | 1605,87  | 12554,53  | 2298,12  | 1318,69    | 7426,325  | -6107,635  |
| LDHB     | 91233,81 | 75596,83 | 100098,76 | 63406,27 | 119800,12 | 57551,19 | 82583,9175 | 88675,655 | -6091,7375 |
| XPOT     | 13877,31 | 11088,92 | 7056,35   | 19295,41 | 14109,03  | 23725,84 | 12829,4975 | 18917,435 | -6087,9375 |
| ANKH     | 1536,13  | 2057,05  | 1421,59   | 208,64   | 8902,02   | 5842,95  | 1305,8525  | 7372,485  | -6066,6325 |
| PHF10    | 9522,64  | 5502,61  | 3488,33   | 7934,73  | 16061,09  | 9293,89  | 6612,0775  | 12677,49  | -6065,4125 |
| ITM2C    | 1306,84  | 36,81    | 1221,83   | 51,89    | 4815,48   | 8623,6   | 654,3425   | 6719,54   | -6065,1975 |
| LRRC58   | 8635,22  | 5005,85  | 2864,24   | 3777,8   | 10716,24  | 11514,19 | 5070,7775  | 11115,215 | -6044,4375 |
| AFF1     | 2837,82  | 4385,76  | 2243,43   | 6697,08  | 10812,17  | 9265,64  | 4041,0225  | 10038,905 | -5997,8825 |
| SKA2     | 2755,03  | 4393,93  | 5689,33   | 2787,39  | 12589,44  | 7177,3   | 3906,42    | 9883,37   | -5976,95   |
| NUSAP1   | 8796,29  | 6828,06  | 4050,24   | 6185,66  | 7357,98   | 17524,69 | 6465,0625  | 12441,335 | -5976,2725 |

|         |          |          |          |          |          |          |            |           |            |
|---------|----------|----------|----------|----------|----------|----------|------------|-----------|------------|
| CYBB    | 891,01   | 574,81   | 326,92   | 42,76    | 12818,3  | 27,96    | 458,875    | 6423,13   | -5964,255  |
| TPP1    | 7902,18  | 10016,69 | 6009     | 5345     | 20186,88 | 6371,15  | 7318,2175  | 13279,015 | -5960,7975 |
| OPTN    | 12,35    | 1952,1   | 31,49    | 1350,65  | 11400,37 | 2189,2   | 836,6475   | 6794,785  | -5958,1375 |
| SEPTIN6 | 6139,64  | 12461,79 | 15006,84 | 5089,52  | 1528,61  | 29724,78 | 9674,4475  | 15626,695 | -5952,2475 |
| EIF4G3  | 4307,19  | 4784,37  | 10138,49 | 5654,76  | 16314,21 | 8018,93  | 6221,2025  | 12166,57  | -5945,3675 |
| KTN1    | 15419,4  | 14939,15 | 11224,22 | 12113,47 | 19610,96 | 19020,05 | 13424,06   | 19315,505 | -5891,445  |
| BPTF    | 8911,33  | 6839,93  | 6945,22  | 7477,19  | 12160,7  | 14675,57 | 7543,4175  | 13418,135 | -5874,7175 |
| USP1    | 8393,75  | 7454,39  | 4053,87  | 5774,47  | 6566,36  | 18010,23 | 6419,12    | 12288,295 | -5869,175  |
| AZIN1   | 7607,44  | 7479,03  | 4281,61  | 7546,4   | 17148,97 | 8023,95  | 6728,62    | 12586,46  | -5857,84   |
| MSI2    | 2216,32  | 4539,65  | 5549,89  | 4440,73  | 474,23   | 19609,44 | 4186,6475  | 10041,835 | -5855,1875 |
| MAPRE1  | 17229,78 | 12233,25 | 11431,24 | 21075,54 | 9973,7   | 32718,05 | 15492,4525 | 21345,875 | -5853,4225 |
| ZEB2    | 9505,54  | 7208,7   | 11476,93 | 7289,34  | 24263,18 | 5175,69  | 8870,1275  | 14719,435 | -5849,3075 |
| POMK    | 3902,38  | 1859,67  | 4104,69  | 2254,68  | 16005,76 | 1711,58  | 3030,355   | 8858,67   | -5828,315  |
| GNAQ    | 3840,6   | 10639,66 | 5744,49  | 8653,49  | 3836,1   | 22184,32 | 7219,56    | 13010,21  | -5790,65   |
| FAM43A  | 494,12   | 12,07    | 439,87   | 9        | 11784,89 | 214,96   | 238,765    | 5999,925  | -5761,16   |
| ARHGEF7 | 7266,17  | 4481,75  | 9621,75  | 4925,57  | 4257,56  | 20408,71 | 6573,81    | 12333,135 | -5759,325  |
| IRF5    | 826,54   | 2958,63  | 1090,79  | 396,09   | 10826,34 | 3328,17  | 1318,0125  | 7077,255  | -5759,2425 |
| VIRMA   | 8167,38  | 5376,89  | 8581,21  | 5834,35  | 23161,85 | 2333,91  | 6989,9575  | 12747,88  | -5757,9225 |
| KIF20B  | 5358,58  | 4944,9   | 2989,44  | 4501,99  | 9820,98  | 10550,96 | 4448,7275  | 10185,97  | -5737,2425 |
| UNCX    | 0        | 1,51     | 0        | 0        | 11378,39 | 88,25    | 0,3775     | 5733,32   | -5732,9425 |
| LILRB4  | 0        | 0        | 0        | 0        | 11443,52 | 1,24     | 0          | 5722,38   | -5722,38   |
| LMO4    | 2482,3   | 965,66   | 7158,62  | 1435,31  | 683,5    | 16776,42 | 3010,4725  | 8729,96   | -5719,4875 |
| JUN     | 75,42    | 105,08   | 721,91   | 601,75   | 11278,96 | 871,67   | 376,04     | 6075,315  | -5699,275  |
| RAB37   | 2322,69  | 511,99   | 15833,04 | 1747,81  | 3239,41  | 18256,08 | 5103,8825  | 10747,745 | -5643,8625 |
| EMB     | 3398,28  | 238,86   | 889,18   | 733,38   | 7148,82  | 6735,67  | 1314,925   | 6942,245  | -5627,32   |
| FAM111A | 3302,62  | 3960,66  | 2232,65  | 4578,42  | 1103,67  | 17184,42 | 3518,5875  | 9144,045  | -5625,4575 |
| DNMT3B  | 3823,53  | 4161,56  | 5435,12  | 2341,63  | 742,47   | 18389,19 | 3940,46    | 9565,83   | -5625,37   |
| FAM98B  | 3670,23  | 2419,85  | 3193,32  | 2709,96  | 2332,71  | 14860,03 | 2998,34    | 8596,37   | -5598,03   |
| SMC1A   | 23599,7  | 16292,94 | 4586,73  | 11024,95 | 5032,06  | 33913,78 | 13876,08   | 19472,92  | -5596,84   |
| RAB27B  | 403,7    | 2751,47  | 36,76    | 315,32   | 363,95   | 12582,84 | 876,8125   | 6473,395  | -5596,5825 |
| STMN3   | 2572,85  | 4969,04  | 8985,67  | 824,85   | 533,09   | 19313,67 | 4338,1025  | 9923,38   | -5585,2775 |
| DPYSL2  | 2863,22  | 2028,94  | 264,35   | 207,18   | 9907,17  | 3928,63  | 1340,9225  | 6917,9    | -5576,9775 |
| FCER1G  | 1086,99  | 1914,9   | 2563,57  | 998,35   | 13161,11 | 1250,3   | 1640,9525  | 7205,705  | -5564,7525 |

|                 |          |          |          |          |          |          |            |           |            |
|-----------------|----------|----------|----------|----------|----------|----------|------------|-----------|------------|
| <b>RGS18</b>    | 5574,13  | 211,97   | 2447,32  | 1008,31  | 10027    | 5713,84  | 2310,4325  | 7870,42   | -5559,9875 |
| <b>PDZD8</b>    | 29750,81 | 24794,64 | 13567,25 | 18581,76 | 3462,48  | 50982,42 | 21673,615  | 27222,45  | -5548,835  |
| <b>IDI1</b>     | 9212,66  | 2715,22  | 5039,57  | 4687,69  | 9303,66  | 12614,16 | 5413,785   | 10958,91  | -5545,125  |
| <b>TMEM170B</b> | 1832,41  | 1090,79  | 918,32   | 761,86   | 9750,58  | 3641,16  | 1150,845   | 6695,87   | -5545,025  |
| <b>CERS6</b>    | 6736     | 3665,69  | 3079,28  | 5843,47  | 6972,26  | 13766,3  | 4831,11    | 10369,28  | -5538,17   |
| <b>TAX1BP1</b>  | 3302,48  | 4646,21  | 4810,34  | 4808,04  | 9743,62  | 10110,97 | 4391,7675  | 9927,295  | -5535,5275 |
| <b>ERO1A</b>    | 3184,95  | 6743,75  | 2836,39  | 4120,76  | 13664,34 | 5843,57  | 4221,4625  | 9753,955  | -5532,4925 |
| <b>ERBIN</b>    | 3413,44  | 5220,7   | 2117,16  | 3934,75  | 6466,51  | 11940,12 | 3671,5125  | 9203,315  | -5531,8025 |
| <b>TBC1D30</b>  | 8,3      | 23,84    | 69,73    | 50,11    | 11083,03 | 49,06    | 37,995     | 5566,045  | -5528,05   |
| <b>LNPEP</b>    | 3058,16  | 2964,38  | 2333,59  | 3200,2   | 8331,94  | 8487,65  | 2889,0825  | 8409,795  | -5520,7125 |
| <b>ROCK1</b>    | 7153,02  | 5683,09  | 6938,61  | 5814,38  | 11856,64 | 11965,88 | 6397,275   | 11911,26  | -5513,985  |
| <b>LSM8</b>     | 2813,39  | 3547,51  | 4694,68  | 1876,53  | 13895,32 | 3597,2   | 3233,0275  | 8746,26   | -5513,2325 |
| <b>PRDX3</b>    | 9473,2   | 11041,38 | 5159,12  | 7898,82  | 18451,49 | 9352,38  | 8393,13    | 13901,935 | -5508,805  |
| <b>NIN</b>      | 2771,2   | 2587,88  | 581,06   | 970,52   | 5410,85  | 9034,89  | 1727,665   | 7222,87   | -5495,205  |
| <b>SERINC1</b>  | 3837,19  | 5247,99  | 4839,54  | 8057,5   | 11497,63 | 10462,12 | 5495,555   | 10979,875 | -5484,32   |
| <b>ALDOC</b>    | 7637,94  | 4329,04  | 7286,29  | 2074,82  | 18611,83 | 3017,75  | 5332,0225  | 10814,79  | -5482,7675 |
| <b>RBPJ</b>     | 5881     | 4947,62  | 3014,92  | 3017,19  | 12658,91 | 6731,03  | 4215,1825  | 9694,97   | -5479,7875 |
| <b>DCP2</b>     | 5955,4   | 6590,19  | 4460,08  | 4167,53  | 8259,88  | 13277,13 | 5293,3     | 10768,505 | -5475,205  |
| <b>SATB2</b>    | 42,92    | 4,02     | 50,07    | 29,87    | 10997,43 | 0        | 31,72      | 5498,715  | -5466,995  |
| <b>RALGAPB</b>  | 1666,24  | 3181,22  | 2707,5   | 4808,9   | 2655,34  | 14424,76 | 3090,965   | 8540,05   | -5449,085  |
| <b>MKX</b>      | 0        | 0        | 25,79    | 3,65     | 10885,81 | 0        | 7,36       | 5442,905  | -5435,545  |
| <b>ARF6</b>     | 9308,78  | 10059,98 | 5974,58  | 9018,55  | 20303,32 | 7729,72  | 8590,4725  | 14016,52  | -5426,0475 |
| <b>SRGAP2</b>   | 3165,06  | 2897,3   | 878,42   | 4403,35  | 10719,67 | 5796,15  | 2836,0325  | 8257,91   | -5421,8775 |
| <b>AKNA</b>     | 2670,73  | 2386,89  | 3344,61  | 1632,36  | 12163,88 | 3694,59  | 2508,6475  | 7929,235  | -5420,5875 |
| <b>ZNF217</b>   | 3308,86  | 3148,67  | 1735,59  | 6650,51  | 10852,46 | 7399,67  | 3710,9075  | 9126,065  | -5415,1575 |
| <b>STMN1</b>    | 29352,25 | 34672,8  | 46972,4  | 29327,62 | 25698,07 | 55277,8  | 35081,2675 | 40487,935 | -5406,6675 |
| <b>TENT5A</b>   | 1330,2   | 295,29   | 1641,7   | 3292,92  | 10542,65 | 3501,65  | 1640,0275  | 7022,15   | -5382,1225 |
| <b>FOS</b>      | 56,93    | 563,92   | 3272,46  | 169,91   | 12532,16 | 243,27   | 1015,805   | 6387,715  | -5371,91   |
| <b>RBM25</b>    | 13995,75 | 14819,32 | 15034,09 | 11152,61 | 27232,74 | 10979,38 | 13750,4425 | 19106,06  | -5355,6175 |
| <b>PRRC2C</b>   | 37768,75 | 21954,36 | 26090,96 | 27534,45 | 38341,06 | 29006,28 | 28337,13   | 33673,67  | -5336,54   |
| <b>TBL1XR1</b>  | 6183,28  | 4300,48  | 4497,93  | 4454,73  | 10199,78 | 10134,36 | 4859,105   | 10167,07  | -5307,965  |
| <b>BRD3</b>     | 5599,98  | 6700,11  | 2907,31  | 5755,37  | 3204,91  | 17877,22 | 5240,6925  | 10541,065 | -5300,3725 |
| <b>FRAT2</b>    | 2326,53  | 3227,85  | 2680,57  | 3144,23  | 13645,75 | 2638,9   | 2844,795   | 8142,325  | -5297,53   |



|          |          |          |           |          |           |          |            |           |            |
|----------|----------|----------|-----------|----------|-----------|----------|------------|-----------|------------|
| MAP3K1   | 2343,33  | 1701,81  | 1109,33   | 1608,12  | 8419,07   | 5553,06  | 1690,6475  | 6986,065  | -5295,4175 |
| GPCPD1   | 4025,41  | 1812,93  | 2196,52   | 1274,14  | 13176,63  | 2060,77  | 2327,25    | 7618,7    | -5291,45   |
| NDUFS2   | 7500,45  | 9734,9   | 11312,98  | 7573,5   | 23711,79  | 4900,97  | 9030,4575  | 14306,38  | -5275,9225 |
| SMN1     | 4410,12  | 3942,72  | 2620,11   | 3857,23  | 14088,95  | 3855,38  | 3707,545   | 8972,165  | -5264,62   |
| TMX4     | 2699,21  | 3331,87  | 2057,61   | 4077,12  | 3516,05   | 13080,99 | 3041,4525  | 8298,52   | -5257,0675 |
| BEX1     | 513,57   | 31,68    | 2215,9    | 1,13     | 11889,67  | 0        | 690,57     | 5944,835  | -5254,265  |
| TASL     | 356,23   | 15,09    | 91,83     | 86,65    | 10376,59  | 400,2    | 137,45     | 5388,395  | -5250,945  |
| TMEM30A  | 5901,6   | 4970,49  | 5551,72   | 6830,62  | 13757,9   | 8366,54  | 5813,6075  | 11062,22  | -5248,6125 |
| USP32    | 3596,26  | 4459,87  | 5010,3    | 5849,8   | 17220,07  | 2733,95  | 4729,0575  | 9977,01   | -5247,9525 |
| TMX1     | 6772,42  | 6078,69  | 2192,65   | 5637,05  | 7195,07   | 13618,17 | 5170,2025  | 10406,62  | -5236,4175 |
| ATP2B4   | 11238,74 | 8770,55  | 10724,76  | 13589,84 | 9278,12   | 23340,23 | 11080,9725 | 16309,175 | -5228,2025 |
| LAMP2    | 6712,79  | 7422,85  | 5979,92   | 6408,67  | 13702,77  | 9968,58  | 6631,0575  | 11835,675 | -5204,6175 |
| SLC2A4RG | 3098,21  | 5036,02  | 5348,29   | 3655,13  | 13699,95  | 5276,94  | 4284,4125  | 9488,445  | -5204,0325 |
| SLC25A1  | 6584,04  | 4276,31  | 3422,92   | 2913,95  | 13221,81  | 5779,43  | 4299,305   | 9500,62   | -5201,315  |
| CDKN1B   | 3535,45  | 2893,73  | 1730,08   | 3140,32  | 9618,25   | 6418,39  | 2824,895   | 8018,32   | -5193,425  |
| SQLE     | 15251,83 | 15364,79 | 2693,53   | 4679,69  | 16493,91  | 12879,02 | 9497,46    | 14686,465 | -5189,005  |
| SMARCA5  | 12881,67 | 10344,36 | 6273,96   | 8161,03  | 10058,62  | 19143,42 | 9415,255   | 14601,02  | -5185,765  |
| MVD      | 3636,19  | 2137,23  | 1787,85   | 1898,23  | 4135,81   | 10951,74 | 2364,875   | 7543,775  | -5178,9    |
| ARL6IP1  | 15453,37 | 12677,92 | 9998,77   | 18313,15 | 17649,3   | 20927,33 | 14110,8025 | 19288,315 | -5177,5125 |
| SNTB1    | 28,09    | 102,72   | 187,49    | 1778,02  | 9280,6    | 2087,52  | 524,08     | 5684,06   | -5159,98   |
| SRSF6    | 11543,59 | 36073,58 | 13620,47  | 17869,11 | 24874,37  | 24985,01 | 19776,6875 | 24929,69  | -5153,0025 |
| WDR26    | 7297,61  | 7774,5   | 5469,4    | 4629,89  | 16279,92  | 6577,15  | 6292,85    | 11428,535 | -5135,685  |
| IARS1    | 13510,74 | 22376,84 | 14315,32  | 25952,8  | 12273,93  | 36052,35 | 19038,925  | 24163,14  | -5124,215  |
| MFSD10   | 6558,38  | 9612,86  | 9610,62   | 5884,79  | 22280,69  | 3793,06  | 7916,6625  | 13036,875 | -5120,2125 |
| P4HB     | 62832,58 | 55448,31 | 106115,52 | 79019,39 | 140129,87 | 21780,05 | 75853,95   | 80954,96  | -5101,01   |
| OSBPL8   | 4304,34  | 7602,95  | 2237,46   | 5707,57  | 4576,54   | 15516,07 | 4963,08    | 10046,305 | -5083,225  |
| ZNF638   | 10957,45 | 7703,92  | 14777,07  | 8601,63  | 24217,4   | 6941,66  | 10510,0175 | 15579,53  | -5069,5125 |
| VPS13C   | 3284,36  | 4253,14  | 4040,87   | 4311,29  | 5730,11   | 12326,18 | 3972,415   | 9028,145  | -5055,73   |
| GOLM1    | 629,37   | 331,65   | 609,1     | 435,82   | 4731,56   | 6351,34  | 501,485    | 5541,45   | -5039,965  |
| SIRPA    | 12,16    | 2,14     | 6,64      | 0        | 8180,68   | 1894,04  | 5,235      | 5037,36   | -5032,125  |
| UGP2     | 3312,26  | 4202,19  | 3881,49   | 4226,5   | 12245,31  | 5603,15  | 3905,61    | 8924,23   | -5018,62   |
| RPL17    | 81552,48 | 74073,63 | 78961,94  | 70787,07 | 134526,59 | 28099,13 | 76343,78   | 81312,86  | -4969,08   |
| UQCRB    | 12016,76 | 8086,25  | 16893,84  | 8874,49  | 28838,08  | 3980,19  | 11467,835  | 16409,135 | -4941,3    |

|                |          |          |           |          |           |          |            |           |            |
|----------------|----------|----------|-----------|----------|-----------|----------|------------|-----------|------------|
| <b>ZNF516</b>  | 595,87   | 4,01     | 1313,09   | 218,35   | 8054      | 2889,2   | 532,83     | 5471,6    | -4938,77   |
| <b>ASXL1</b>   | 6315,31  | 8091,25  | 7087,95   | 11113,27 | 7240,44   | 18925,4  | 8151,945   | 13082,92  | -4930,975  |
| <b>CSF3R</b>   | 220,4    | 112,87   | 1045,44   | 106,67   | 10438,1   | 157,68   | 371,345    | 5297,89   | -4926,545  |
| <b>THBD</b>    | 70,72    | 89,77    | 214,89    | 9        | 9777,68   | 256,03   | 96,095     | 5016,855  | -4920,76   |
| <b>CEP70</b>   | 1561,93  | 2388,16  | 2854,54   | 1428,25  | 335,48    | 13618    | 2058,22    | 6976,74   | -4918,52   |
| <b>POGLUT3</b> | 310,45   | 2191,58  | 1769,26   | 3583,84  | 2930,66   | 10831,33 | 1963,7825  | 6880,995  | -4917,2125 |
| <b>SUZ12</b>   | 8193,19  | 6222,57  | 3640,08   | 5560,81  | 10899,92  | 10696,34 | 5904,1625  | 10798,13  | -4893,9675 |
| <b>CLTCL1</b>  | 15,9     | 89,98    | 67,42     | 158,38   | 9446,6    | 472,44   | 82,92      | 4959,52   | -4876,6    |
| <b>PPP4R2</b>  | 2142,8   | 6723,64  | 2404,43   | 2049,94  | 7749,99   | 8650,39  | 3330,2025  | 8200,19   | -4869,9875 |
| <b>MT-ND2</b>  | 224953,3 | 157576,4 | 115856,07 | 153290,5 | 152442,92 | 183113,8 | 162919,065 | 167778,35 | -4859,285  |
| <b>CTDSPL2</b> | 3261,85  | 3540,15  | 1190,34   | 3655,09  | 5334,8    | 10206,26 | 2911,8575  | 7770,53   | -4858,6725 |
| <b>SH3KBP1</b> | 3244,16  | 2416,54  | 3825,71   | 4263,16  | 14924,07  | 1648,4   | 3437,3925  | 8286,235  | -4848,8425 |
| <b>CHAMP1</b>  | 6622,85  | 4236,12  | 5951,7    | 3478,22  | 2339,83   | 17499,83 | 5072,2225  | 9919,83   | -4847,6075 |
| <b>IGF1R</b>   | 4286,69  | 2707,7   | 4698,77   | 2165,85  | 144,55    | 16476,3  | 3464,7525  | 8310,425  | -4845,6725 |
| <b>NUCB2</b>   | 5356,84  | 10345,13 | 19648,7   | 8539,01  | 13434,53  | 18198,77 | 10972,42   | 15816,65  | -4844,23   |
| <b>EXOC3</b>   | 3113,38  | 6948,56  | 7939,71   | 4929,29  | 17693,32  | 3414,84  | 5732,735   | 10554,08  | -4821,345  |
| <b>NR3C1</b>   | 1672,52  | 1228,81  | 913,12    | 1740,19  | 6082,02   | 6333,41  | 1388,66    | 6207,715  | -4819,055  |
| <b>CCDC14</b>  | 8649,48  | 7236,16  | 6183,5    | 5180,11  | 4597,16   | 18660,15 | 6812,3125  | 11628,655 | -4816,3425 |
| <b>YY1</b>     | 10758,02 | 10660,03 | 5145      | 9833,98  | 10498,51  | 17332,14 | 9099,2575  | 13915,325 | -4816,0675 |
| <b>ZCCHC14</b> | 995,05   | 1648,41  | 1220,81   | 663,74   | 1363,31   | 10520,34 | 1132,0025  | 5941,825  | -4809,8225 |
| <b>GPBP1</b>   | 7486,09  | 5813,63  | 6815,25   | 3739,42  | 12875,95  | 8657,53  | 5963,5975  | 10766,74  | -4803,1425 |
| <b>ZFP36</b>   | 487,65   | 1151,46  | 2480,61   | 2008,03  | 11012,42  | 1652,71  | 1531,9375  | 6332,565  | -4800,6275 |
| <b>LUC7L2</b>  | 10414,82 | 7224,1   | 7592,89   | 6237,06  | 17589,26  | 7745,5   | 7867,2175  | 12667,38  | -4800,1625 |
| <b>SEPTIN9</b> | 7152,43  | 20430,07 | 16525,58  | 2674,93  | 19354,18  | 13633,14 | 11695,7525 | 16493,66  | -4797,9075 |
| <b>PAPOLA</b>  | 14906,06 | 12119,2  | 7850,24   | 12666,08 | 16178,73  | 17171,57 | 11885,395  | 16675,15  | -4789,755  |
| <b>PCNX4</b>   | 5445,1   | 5998,47  | 2711,97   | 3731,04  | 4755,12   | 13727,37 | 4471,645   | 9241,245  | -4769,6    |
| <b>CLEC11A</b> | 10731,81 | 34390,92 | 3023,72   | 32828,61 | 37182,07  | 12841,3  | 20243,765  | 25011,685 | -4767,92   |
| <b>DCTN4</b>   | 2928,62  | 4271,54  | 2782,16   | 4467,65  | 8191,92   | 8564,43  | 3612,4925  | 8378,175  | -4765,6825 |
| <b>IFI16</b>   | 1751,26  | 4546,52  | 6713,65   | 687,1    | 4250,06   | 12121,17 | 3424,6325  | 8185,615  | -4760,9825 |
| <b>UTP6</b>    | 5614,73  | 4411,21  | 7553,94   | 5151,54  | 18056,95  | 2822,96  | 5682,855   | 10439,955 | -4757,1    |
| <b>MYO18A</b>  | 1913,81  | 13179,49 | 1758,92   | 1225,64  | 4282,57   | 14252,51 | 4519,465   | 9267,54   | -4748,075  |
| <b>GLUD1</b>   | 11668,02 | 10518,62 | 6541,19   | 8506,51  | 14160,65  | 13947,75 | 9308,585   | 14054,2   | -4745,615  |
| <b>MGST1</b>   | 2323,29  | 551,44   | 3783,71   | 1487,45  | 13562,47  | 0        | 2036,4725  | 6781,235  | -4744,7625 |

|                |          |          |          |          |          |          |            |           |            |
|----------------|----------|----------|----------|----------|----------|----------|------------|-----------|------------|
| <b>NXPE3</b>   | 527,3    | 1834,72  | 1205,13  | 801,94   | 8892,64  | 2780,57  | 1092,2725  | 5836,605  | -4744,3325 |
| <b>MS4A7</b>   | 0,72     | 1,24     | 0        | 12,9     | 9307,02  | 166,54   | 3,715      | 4736,78   | -4733,065  |
| <b>MYCBP2</b>  | 24927,2  | 9494,22  | 32134,44 | 15610,24 | 41816,53 | 8724,2   | 20541,525  | 25270,365 | -4728,84   |
| <b>ARPC3</b>   | 14193,23 | 13823,2  | 18555,23 | 16606,54 | 31483,42 | 9553,46  | 15794,55   | 20518,44  | -4723,89   |
| <b>DCAF12</b>  | 6008,62  | 5053,06  | 3551,17  | 5865,71  | 7768,32  | 11909,2  | 5119,64    | 9838,76   | -4719,12   |
| <b>HIPK2</b>   | 5561,69  | 3578,13  | 3562,34  | 3711,33  | 5166,59  | 12476,8  | 4103,3725  | 8821,695  | -4718,3225 |
| <b>RESF1</b>   | 3978,09  | 3841,61  | 1738,2   | 2850,6   | 5897,02  | 9725,81  | 3102,125   | 7811,415  | -4709,29   |
| <b>GIGYF1</b>  | 6759,46  | 10876,27 | 6492,85  | 6306,47  | 15371,87 | 9261,36  | 7608,7625  | 12316,615 | -4707,8525 |
| <b>DENND3</b>  | 1642,06  | 5713,18  | 1462,7   | 2515,49  | 12040,9  | 3041,22  | 2833,3575  | 7541,06   | -4707,7025 |
| <b>FN1</b>     | 30,85    | 43,33    | 58,13    | 13,19    | 9368,15  | 109,42   | 36,375     | 4738,785  | -4702,41   |
| <b>PRKCD</b>   | 2977,91  | 4466,57  | 2328,33  | 3340,38  | 15951,65 | 6,62     | 3278,2975  | 7979,135  | -4700,8375 |
| <b>SLAIN1</b>  | 34,1     | 612,24   | 2572,23  | 916,88   | 11460,8  | 0        | 1033,8625  | 5730,4    | -4696,5375 |
| <b>MTAP</b>    | 0        | 4869,33  | 2414,77  | 0        | 4506,05  | 8527,12  | 1821,025   | 6516,585  | -4695,56   |
| <b>PDS5A</b>   | 15174,55 | 12977,48 | 5084,41  | 10392,7  | 15298,24 | 15907,23 | 10907,285  | 15602,735 | -4695,45   |
| <b>CD47</b>    | 9962,75  | 7986,67  | 3354,38  | 14427,81 | 4319,67  | 22913,42 | 8932,9025  | 13616,545 | -4683,6425 |
| <b>DARS1</b>   | 9519     | 12558,71 | 5846,34  | 9832,43  | 17398,52 | 10827,6  | 9439,12    | 14113,06  | -4673,94   |
| <b>RTN4</b>    | 11957,91 | 10460,06 | 10956,15 | 15222,23 | 18939,07 | 14675,65 | 12149,0875 | 16807,36  | -4658,2725 |
| <b>FUT4</b>    | 3052,25  | 1323,88  | 1575,84  | 3765,42  | 11287,15 | 2862,6   | 2429,3475  | 7074,875  | -4645,5275 |
| <b>AHRR</b>    | 11,38    | 2495,34  | 110,31   | 430,23   | 9343,33  | 1457,78  | 761,815    | 5400,555  | -4638,74   |
| <b>IPO7</b>    | 16799,71 | 13910,35 | 8368,48  | 15640,34 | 16380,21 | 20239,13 | 13679,72   | 18309,67  | -4629,95   |
| <b>SPN</b>     | 64126,48 | 80407,14 | 22949,49 | 65827,06 | 15376,98 | 110531,5 | 58327,5425 | 62954,215 | -4626,6725 |
| <b>TLE5</b>    | 11404,01 | 15423,04 | 17084,29 | 5966,07  | 18441,63 | 15734,38 | 12469,3525 | 17088,005 | -4618,6525 |
| <b>VOPP1</b>   | 3532,66  | 58,06    | 1111,23  | 11,27    | 2377,25  | 9155,84  | 1178,305   | 5766,545  | -4588,24   |
| <b>KIF15</b>   | 5410,85  | 3614,34  | 3521,12  | 2350,39  | 7700,63  | 8923,36  | 3724,175   | 8311,995  | -4587,82   |
| <b>ADNP</b>    | 10094,31 | 9014,24  | 10341,77 | 9859,39  | 13116,44 | 15710,8  | 9827,4275  | 14413,62  | -4586,1925 |
| <b>CBL</b>     | 1294,22  | 3500,84  | 339,47   | 1968,58  | 4900,07  | 7804,42  | 1775,7775  | 6352,245  | -4576,4675 |
| <b>YWHAZ</b>   | 21897,14 | 30380,12 | 21860,01 | 29574,39 | 35883,48 | 25122,48 | 25927,915  | 30502,98  | -4575,065  |
| <b>SLC30A1</b> | 1217,19  | 998      | 650,17   | 1530,47  | 8921,32  | 2408,22  | 1098,9575  | 5664,77   | -4565,8125 |
| <b>CAT</b>     | 7963,67  | 4152,44  | 9164,4   | 10418,81 | 10533,37 | 14444,8  | 7924,83    | 12489,085 | -4564,255  |
| <b>PCNX1</b>   | 1557,61  | 325,42   | 2273,31  | 724,62   | 8716,66  | 2840,77  | 1220,24    | 5778,715  | -4558,475  |
| <b>CD70</b>    | 12,01    | 3091,96  | 13,24    | 37,85    | 10500,67 | 181,42   | 788,765    | 5341,045  | -4552,28   |
| <b>ORAI3</b>   | 826,15   | 3807,58  | 3081,61  | 2085,9   | 7720,59  | 6280,42  | 2450,31    | 7000,505  | -4550,195  |
| <b>LRPPRC</b>  | 28157,75 | 28491,28 | 17981,67 | 23396    | 48712,49 | 9393,89  | 24506,675  | 29053,19  | -4546,515  |

|            |          |          |          |          |          |          |            |           |            |
|------------|----------|----------|----------|----------|----------|----------|------------|-----------|------------|
| KCTD12     | 327,94   | 23,38    | 727,31   | 401,75   | 8183,3   | 1627,91  | 370,095    | 4905,605  | -4535,51   |
| AHNAK      | 3665,79  | 16069,55 | 11625,26 | 31315,01 | 26604,03 | 13793,84 | 15668,9025 | 20198,935 | -4530,0325 |
| MDH1       | 8672,09  | 7266,1   | 8000,97  | 9914,34  | 14990,32 | 10975,44 | 8463,375   | 12982,88  | -4519,505  |
| SESN3      | 1138,56  | 801,3    | 2439,84  | 1228,49  | 11243,78 | 598,68   | 1402,0475  | 5921,23   | -4519,1825 |
| ERLIN1     | 3357,33  | 3462,89  | 1586,54  | 3200,97  | 8855,82  | 5975,33  | 2901,9325  | 7415,575  | -4513,6425 |
| HAL        | 28,77    | 5,08     | 56,21    | 77,28    | 9060,63  | 33,42    | 41,835     | 4547,025  | -4505,19   |
| CMTM3      | 1338,52  | 4646,79  | 2553,88  | 1358,04  | 3598,42  | 10347,03 | 2474,3075  | 6972,725  | -4498,4175 |
| DGKD       | 3013,41  | 6990,72  | 1982,06  | 3070,95  | 10429,2  | 6082,73  | 3764,285   | 8255,965  | -4491,68   |
| EIF4EBP2   | 8718,31  | 11545,29 | 5904,79  | 5829,31  | 8951,13  | 16015,18 | 7999,425   | 12483,155 | -4483,73   |
| INSR       | 130,38   | 2819,13  | 1063,81  | 867,69   | 4606,8   | 6784,91  | 1220,2525  | 5695,855  | -4475,6025 |
| FADS1      | 20524,52 | 11202,2  | 8773,45  | 12105,38 | 11489,77 | 23694,62 | 13151,3875 | 17592,195 | -4440,8075 |
| RAP2A      | 3156,89  | 7355,41  | 4261,63  | 2163,82  | 2893,85  | 14431,27 | 4234,4375  | 8662,56   | -4428,1225 |
| TXN        | 10675,73 | 8432,53  | 8950,54  | 11650,61 | 15564,13 | 13129,96 | 9927,3525  | 14347,045 | -4419,6925 |
| ZBTB33     | 3077,17  | 3061,07  | 2425,78  | 4432,41  | 8582,15  | 6754,05  | 3249,1075  | 7668,1    | -4418,9925 |
| IL6R       | 767,49   | 73,94    | 1456,6   | 808,26   | 10306,65 | 75,1     | 776,5725   | 5190,875  | -4414,3025 |
| UNC93B1    | 1598,9   | 1736,92  | 2241,91  | 2600,52  | 12634,33 | 281,19   | 2044,5625  | 6457,76   | -4413,1975 |
| HSD17B11   | 5312,3   | 4141,9   | 2729,08  | 5939,9   | 10753,68 | 7132,42  | 4530,795   | 8943,05   | -4412,255  |
| NCK2       | 1038,87  | 3204     | 548,07   | 192,24   | 8088,69  | 3214,49  | 1245,795   | 5651,59   | -4405,795  |
| MOB3A      | 3232,06  | 8072,27  | 1357,37  | 3002,72  | 10860,17 | 5766,7   | 3916,105   | 8313,435  | -4397,33   |
| EIF3M      | 24120,36 | 9696,92  | 19030,07 | 29624,69 | 29670,87 | 20356,2  | 20618,01   | 25013,535 | -4395,525  |
| SMCHD1     | 6767,97  | 6141,34  | 1848,65  | 7012,31  | 8011,47  | 11660,27 | 5442,5675  | 9835,87   | -4393,3025 |
| SMG1       | 8360,89  | 14086,79 | 3853,62  | 9735,89  | 6881,25  | 19910,18 | 9009,2975  | 13395,715 | -4386,4175 |
| GAA        | 962,79   | 568,93   | 1230,17  | 284,31   | 8480,52  | 1797,7   | 761,55     | 5139,11   | -4377,56   |
| TOR1AIP1   | 5028,15  | 2418,51  | 1914,63  | 4039,16  | 10297,14 | 5125,32  | 3350,1125  | 7711,23   | -4361,1175 |
| CSGALNACT2 | 1229,56  | 497,87   | 689,66   | 1790,43  | 7710,85  | 3112,51  | 1051,88    | 5411,68   | -4359,8    |
| PHACTR3    | 3,01     | 0        | 20,18    | 2,75     | 8270,26  | 454,83   | 6,485      | 4362,545  | -4356,06   |
| HMGB3      | 4937,2   | 6346,13  | 5350,41  | 2671,55  | 9368,62  | 8974,53  | 4826,3225  | 9171,575  | -4345,2525 |
| CHCHD7     | 1696,79  | 1973,18  | 2493,45  | 452,53   | 9775,2   | 2211,12  | 1653,9875  | 5993,16   | -4339,1725 |
| HDAC5      | 1262,33  | 4269,85  | 1580,65  | 1592,52  | 4291,26  | 8734,36  | 2176,3375  | 6512,81   | -4336,4725 |
| ZNF106     | 4066,89  | 8409,14  | 2722,82  | 5352,09  | 11438,07 | 7501,58  | 5137,735   | 9469,825  | -4332,09   |
| C5orf15    | 1501,82  | 1437,03  | 562,01   | 1027,44  | 5934,9   | 4977,22  | 1132,075   | 5456,06   | -4323,985  |
| CAPZA1     | 20102,59 | 12183,46 | 19110,22 | 25046,89 | 28837,11 | 18029,31 | 19110,79   | 23433,21  | -4322,42   |
| HOXA11     | 57,01    | 1,79     | 604,12   | 2,68     | 7334,68  | 1621,69  | 166,4      | 4478,185  | -4311,785  |

|          |          |          |          |          |          |          |            |           |            |
|----------|----------|----------|----------|----------|----------|----------|------------|-----------|------------|
| WAC      | 9377,93  | 10128,26 | 9049,79  | 11557,1  | 13758,71 | 14919,63 | 10028,27   | 14339,17  | -4310,9    |
| IMPDH2   | 19623,02 | 58525,67 | 19002,73 | 20140,99 | 56245,53 | 11009,87 | 29323,1025 | 33627,7   | -4304,5975 |
| ANXA2    | 3075,09  | 4897,5   | 16831,31 | 20040,05 | 28770,66 | 2258,68  | 11210,9875 | 15514,67  | -4303,6825 |
| RICTOR   | 2018,99  | 2366,48  | 2711,48  | 3272,48  | 8957,87  | 4829,73  | 2592,3575  | 6893,8    | -4301,4425 |
| CLN3     | 3176,01  | 3199,27  | 2250,47  | 3918,27  | 3586,32  | 11280,27 | 3136,005   | 7433,295  | -4297,29   |
| CUL4A    | 14030,21 | 8734,01  | 22643,78 | 10231,41 | 8420,23  | 27988,22 | 13909,8525 | 18204,225 | -4294,3725 |
| TRIM56   | 5312,84  | 7832,16  | 8444,09  | 5968,66  | 11378,26 | 10983,76 | 6889,4375  | 11181,01  | -4291,5725 |
| UBE2J1   | 4044,91  | 6371,97  | 2866,07  | 6324,46  | 10939,37 | 7417,77  | 4901,8525  | 9178,57   | -4276,7175 |
| NEMP1    | 3894,9   | 3684,86  | 1735,84  | 5581,33  | 3894,28  | 12094,58 | 3724,2325  | 7994,43   | -4270,1975 |
| CPXM1    | 2665,08  | 2419,95  | 8428,33  | 354,48   | 442,63   | 15030,4  | 3466,96    | 7736,515  | -4269,555  |
| PRKAR2B  | 2556,36  | 12333,58 | 2595,17  | 4631,94  | 4122,81  | 15471,67 | 5529,2625  | 9797,24   | -4267,9775 |
| IARS2    | 15988,73 | 8376,27  | 7315,33  | 6418,99  | 19758,61 | 7824,09  | 9524,83    | 13791,35  | -4266,52   |
| CCNB1IP1 | 4902,57  | 4579,75  | 3749,48  | 3630,5   | 11772,33 | 5183,06  | 4215,575   | 8477,695  | -4262,12   |
| TOP1MT   | 474,21   | 10400,48 | 942,78   | 6700,34  | 17272,08 | 486,9    | 4629,4525  | 8879,49   | -4250,0375 |
| STARD4   | 3814,51  | 1654,38  | 856,76   | 1140,82  | 5307,77  | 6888,77  | 1866,6175  | 6098,27   | -4231,6525 |
| HCLS1    | 10023,38 | 304,13   | 20926,47 | 11971,46 | 23360,6  | 6683,99  | 10806,36   | 15022,295 | -4215,935  |
| TIAL1    | 6908     | 5745,33  | 4522,46  | 4489     | 11953,04 | 7309,77  | 5416,1975  | 9631,405  | -4215,2075 |
| SREK1    | 8804,62  | 6790,41  | 4844,73  | 3600,84  | 11211,03 | 9230,58  | 6010,15    | 10220,805 | -4210,655  |
| FANCA    | 6195,01  | 4056,03  | 1790,37  | 2205,49  | 5076,3   | 10460,99 | 3561,725   | 7768,645  | -4206,92   |
| ATL3     | 2865,51  | 2508,25  | 1577,12  | 2407,99  | 8174,93  | 4915,68  | 2339,7175  | 6545,305  | -4205,5875 |
| NUFIP2   | 8075,12  | 8516,19  | 5182,38  | 9162,78  | 10444,9  | 13433,32 | 7734,1175  | 11939,11  | -4204,9925 |
| BMP8B    | 784,06   | 33,95    | 908,22   | 598,69   | 9550,94  | 17,48    | 581,23     | 4784,21   | -4202,98   |
| PRPF8    | 23773,34 | 38603,58 | 32589,87 | 29237,82 | 49882,08 | 20614,16 | 31051,1525 | 35248,12  | -4196,9675 |
| KDM3A    | 7969,46  | 5353,97  | 3936,6   | 6846,83  | 13567,87 | 6867,08  | 6026,715   | 10217,475 | -4190,76   |
| CHCHD3   | 8676,44  | 5210,65  | 4559,58  | 7301,76  | 14320,33 | 6925,56  | 6437,1075  | 10622,945 | -4185,8375 |
| NLRP3    | 337,11   | 50,7     | 34,8     | 47,1     | 8124,87  | 475,09   | 117,4275   | 4299,98   | -4182,5525 |
| PHGDH    | 3280,58  | 1,44     | 8038,63  | 784,09   | 2299,27  | 12115,82 | 3026,185   | 7207,545  | -4181,36   |
| RNF114   | 4273,58  | 6212,36  | 4774,25  | 7284,22  | 11994,55 | 7638,73  | 5636,1025  | 9816,64   | -4180,5375 |
| FCGR2B   | 40,71    | 8,35     | 248,5    | 930,02   | 8950,8   | 5,8      | 306,895    | 4478,3    | -4171,405  |
| MRPL33   | 1202,28  | 1299,54  | 2418,92  | 638,45   | 10623    | 494,08   | 1389,7975  | 5558,54   | -4168,7425 |
| CBWD2    | 2273,13  | 2537,78  | 1807,21  | 2024,67  | 9088,52  | 3559,89  | 2160,6975  | 6324,205  | -4163,5075 |
| RHEX     | 60,48    | 28,67    | 55,95    | 1030,98  | 484,91   | 8427,23  | 294,02     | 4456,07   | -4162,05   |
| PIK3CD   | 564,58   | 750,47   | 932,34   | 4048,34  | 8795,32  | 2670,76  | 1573,9325  | 5733,04   | -4159,1075 |



|                 |          |          |           |          |           |          |            |            |            |
|-----------------|----------|----------|-----------|----------|-----------|----------|------------|------------|------------|
| <b>SAMHD1</b>   | 445,44   | 736,59   | 1036,3    | 1144,04  | 9922,11   | 62,4     | 840,5925   | 4992,255   | -4151,6625 |
| <b>PJA2</b>     | 7153,82  | 8293,78  | 3556,1    | 7942,48  | 8507,58   | 13263,58 | 6736,545   | 10885,58   | -4149,035  |
| <b>PHF2</b>     | 1749,41  | 3589,72  | 1297,66   | 2213,02  | 2547,03   | 10169,25 | 2212,4525  | 6358,14    | -4145,6875 |
| <b>STK4</b>     | 5088,02  | 4337,26  | 3179,28   | 5011,15  | 5759,93   | 11332,01 | 4403,9275  | 8545,97    | -4142,0425 |
| <b>MT-ND3</b>   | 26119,58 | 24223,6  | 33647,21  | 18839,47 | 34116,19  | 25569,42 | 25707,465  | 29842,805  | -4135,34   |
| <b>MFSD14B</b>  | 2842,39  | 5531,27  | 3659,38   | 6484,4   | 5499,98   | 11992,86 | 4629,36    | 8746,42    | -4117,06   |
| <b>APAF1</b>    | 1840,77  | 1772,78  | 1786,33   | 2910,11  | 7451,98   | 4930,4   | 2077,4975  | 6191,19    | -4113,6925 |
| <b>ALDH9A1</b>  | 5379,67  | 3309,32  | 2933,11   | 3745,16  | 12344,95  | 3561,65  | 3841,815   | 7953,3     | -4111,485  |
| <b>WSB1</b>     | 7756,23  | 11484,11 | 6289,31   | 5714,71  | 14951,54  | 8891,08  | 7811,09    | 11921,31   | -4110,22   |
| <b>CLSTN2</b>   | 0        | 0        | 0         | 0        | 8202,27   | 11,36    | 0          | 4106,815   | -4106,815  |
| <b>BAZ2A</b>    | 7390,93  | 10366,19 | 5307,15   | 7843,81  | 8965,18   | 14686,57 | 7727,02    | 11825,875  | -4098,855  |
| <b>BTBD2</b>    | 3565,83  | 9291,21  | 8214,2    | 3430,04  | 12800,1   | 7642,44  | 6125,32    | 10221,27   | -4095,95   |
| <b>KMT2E</b>    | 5409,48  | 4737,21  | 4699,87   | 3689,34  | 11413,87  | 6040,94  | 4633,975   | 8727,405   | -4093,43   |
| <b>EEF1B2</b>   | 45398,69 | 51898,31 | 39239,24  | 34015,29 | 74631,16  | 18828,69 | 42637,8825 | 46729,925  | -4092,0425 |
| <b>SLC2A5</b>   | 6,5      | 16,77    | 3,31      | 0        | 8162,54   | 29,97    | 6,645      | 4096,255   | -4089,61   |
| <b>ANLN</b>     | 4456,91  | 2834,72  | 1717,97   | 2879,56  | 6522,61   | 7595,29  | 2972,29    | 7058,95    | -4086,66   |
| <b>THOC2</b>    | 13430,49 | 10719,9  | 25347,55  | 11015,52 | 28818,3   | 9607,19  | 15128,365  | 19212,745  | -4084,38   |
| <b>PHIP</b>     | 7970,5   | 5070,72  | 8295,18   | 9397,79  | 12593,37  | 10910,39 | 7683,5475  | 11751,88   | -4068,3325 |
| <b>FTO</b>      | 2063,06  | 2132,48  | 915,63    | 1560,91  | 1617,72   | 9841,35  | 1668,02    | 5729,535   | -4061,515  |
| <b>RASSF4</b>   | 23,53    | 241,96   | 68,58     | 19,14    | 8184,23   | 108,27   | 88,3025    | 4146,25    | -4057,9475 |
| <b>PAN2</b>     | 2075,48  | 3412,84  | 2880,73   | 2906,18  | 5057,64   | 8690,31  | 2818,8075  | 6873,975   | -4055,1675 |
| <b>PPP1R16B</b> | 398,77   | 3330,79  | 968,23    | 983,9    | 519,97    | 10389,11 | 1420,4225  | 5454,54    | -4034,1175 |
| <b>ST3GAL3</b>  | 1583,82  | 1483,6   | 3296,83   | 1856,46  | 9890      | 2286,34  | 2055,1775  | 6088,17    | -4032,9925 |
| <b>AKAP9</b>    | 5841,59  | 6824,24  | 8932,1    | 5480,11  | 15388,38  | 6202,96  | 6769,51    | 10795,67   | -4026,16   |
| <b>GTF3C4</b>   | 3964,88  | 5310,21  | 2394,49   | 3938,28  | 3056      | 12786,28 | 3901,965   | 7921,14    | -4019,175  |
| <b>GRSF1</b>    | 11360,43 | 9551,89  | 6914,12   | 9307,33  | 20042,69  | 6537,73  | 9283,4425  | 13290,21   | -4006,7675 |
| <b>TIMP2</b>    | 5,49     | 4,26     | 1,9       | 0        | 4966,99   | 3052,02  | 2,9125     | 4009,505   | -4006,5925 |
| <b>RAD50</b>    | 5488,48  | 4441,41  | 2074,02   | 4286,12  | 10582,89  | 5574,71  | 4072,5075  | 8078,8     | -4006,2925 |
| <b>TMED10</b>   | 8752,98  | 8325,3   | 9013,72   | 10796,55 | 12351,27  | 14096,44 | 9222,1375  | 13223,855  | -4001,7175 |
| <b>RPL5</b>     | 112323,4 | 109765,7 | 139051,23 | 110524,6 | 169766,95 | 74068,66 | 117916,228 | 121917,805 | -4001,5775 |
| <b>PCNP</b>     | 8543,66  | 11174,77 | 4868,82   | 8264,02  | 11230,92  | 13196,2  | 8212,8175  | 12213,56   | -4000,7425 |
| <b>ONECUT2</b>  | 80,44    | 15,09    | 207,54    | 276,84   | 8289,89   | 0        | 144,9775   | 4144,945   | -3999,9675 |
| <b>RAPGEF1</b>  | 1879,25  | 3039,25  | 196,68    | 2241,76  | 3590,9    | 8084,93  | 1839,235   | 5837,915   | -3998,68   |

|                  |          |          |          |          |          |          |            |           |            |
|------------------|----------|----------|----------|----------|----------|----------|------------|-----------|------------|
| <b>SLC25A36</b>  | 5872,02  | 6913,32  | 3424,02  | 2915,57  | 7861,18  | 9681,19  | 4781,2325  | 8771,185  | -3989,9525 |
| <b>PPP2R5C</b>   | 5904,12  | 5958,25  | 5516,37  | 5093,69  | 9388,69  | 9806,96  | 5618,1075  | 9597,825  | -3979,7175 |
| <b>CKS1B</b>     | 11246,88 | 5752,03  | 7818,08  | 9327,34  | 16944,22 | 8084,73  | 8536,0825  | 12514,475 | -3978,3925 |
| <b>IL1RN</b>     | 1,81     | 1,55     | 5,65     | 69,43    | 7991,54  | 1,79     | 19,61      | 3996,665  | -3977,055  |
| <b>CDH2</b>      | 4,02     | 3,03     | 34,47    | 0        | 7,27     | 7957,62  | 10,38      | 3982,445  | -3972,065  |
| <b>TAOK1</b>     | 3594,48  | 3650,53  | 2494,94  | 3207,95  | 5435,37  | 8963,33  | 3236,975   | 7199,35   | -3962,375  |
| <b>ACSL3</b>     | 6306,57  | 3296,63  | 3612,38  | 5123,15  | 4364,13  | 12720,85 | 4584,6825  | 8542,49   | -3957,8075 |
| <b>SERPINB10</b> | 1,5      | 1,28     | 0        | 0        | 7909,1   | 4,44     | 0,695      | 3956,77   | -3956,075  |
| <b>SPI1</b>      | 6463,67  | 2232,35  | 7176,64  | 10883,04 | 19454,33 | 1831,65  | 6688,925   | 10642,99  | -3954,065  |
| <b>VSIR</b>      | 6389,13  | 6074,76  | 5862,55  | 6301,95  | 15642,12 | 4579,64  | 6157,0975  | 10110,88  | -3953,7825 |
| <b>PTPRE</b>     | 311,68   | 2424,49  | 27,45    | 1900,46  | 8450,27  | 1757,42  | 1166,02    | 5103,845  | -3937,825  |
| <b>HMMR</b>      | 5990,72  | 4461,47  | 1527,92  | 3462,18  | 5109,57  | 10485,37 | 3860,5725  | 7797,47   | -3936,8975 |
| <b>BRI3</b>      | 1548,85  | 1135,42  | 1996,79  | 1200,54  | 9488,67  | 1324,83  | 1470,4     | 5406,75   | -3936,35   |
| <b>MMS19</b>     | 7001,11  | 7845,03  | 8739,95  | 6587,63  | 18188,4  | 4768,42  | 7543,43    | 11478,41  | -3934,98   |
| <b>LCP1</b>      | 25282,72 | 33649,79 | 26745,03 | 21931,54 | 53520,54 | 8141,97  | 26902,27   | 30831,255 | -3928,985  |
| <b>KLHL9</b>     | 0        | 3239,92  | 1748,48  | 0        | 1905,13  | 8443,62  | 1247,1     | 5174,375  | -3927,275  |
| <b>NFATC4</b>    | 167,15   | 2203,03  | 1651,48  | 7,54     | 184,3    | 9670,5   | 1007,3     | 4927,4    | -3920,1    |
| <b>EXOC5</b>     | 2857,12  | 4532,54  | 931,8    | 3895,64  | 2468,43  | 11438,24 | 3054,275   | 6953,335  | -3899,06   |
| <b>SDC2</b>      | 0        | 32,39    | 0        | 4,66     | 7808,45  | 0        | 9,2625     | 3904,225  | -3894,9625 |
| <b>UHRF1BP1L</b> | 1257,67  | 1170,88  | 1273,65  | 2026,37  | 8896,32  | 1756,12  | 1432,1425  | 5326,22   | -3894,0775 |
| <b>ACTN1</b>     | 16394,39 | 21983,04 | 12990,36 | 16446,56 | 22596,08 | 19068,24 | 16953,5875 | 20832,16  | -3878,5725 |
| <b>PGM1</b>      | 418,26   | 1160,44  | 2758,55  | 5,63     | 6710,95  | 3213,06  | 1085,72    | 4962,005  | -3876,285  |
| <b>MSMO1</b>     | 3645,87  | 666,61   | 471,01   | 1470,95  | 5339,29  | 5521,17  | 1563,61    | 5430,23   | -3866,62   |
| <b>FOXP4</b>     | 2605,56  | 2825,29  | 3387,3   | 1455     | 7125,09  | 5730,92  | 2568,2875  | 6428,005  | -3859,7175 |
| <b>GNB2</b>      | 16222,91 | 13530,35 | 19056,35 | 14471,04 | 28510,8  | 10842,57 | 15820,1625 | 19676,685 | -3856,5225 |
| <b>APOBR</b>     | 3621,4   | 4913,22  | 4690,86  | 6058,3   | 12920,03 | 4424,31  | 4820,945   | 8672,17   | -3851,225  |
| <b>TMEM38B</b>   | 1018,56  | 862,41   | 530,2    | 1628,98  | 3180,4   | 6535,77  | 1010,0375  | 4858,085  | -3848,0475 |
| <b>ITPRID2</b>   | 8972,25  | 5665,58  | 6714,06  | 6443,94  | 8220,85  | 13370,19 | 6948,9575  | 10795,52  | -3846,5625 |
| <b>SHOC2</b>     | 2533,63  | 2350,25  | 1470,99  | 2971,1   | 7055,55  | 5291,83  | 2331,4925  | 6173,69   | -3842,1975 |
| <b>FCGR1A</b>    | 3,09     | 1,32     | 82,62    | 7,86     | 7730,47  | 0        | 23,7225    | 3865,235  | -3841,5125 |
| <b>NFATC2IP</b>  | 5486     | 6015,17  | 3266,4   | 6061,59  | 6044,23  | 12037,76 | 5207,29    | 9040,995  | -3833,705  |
| <b>PPP3CA</b>    | 6389,39  | 4258,08  | 4055,04  | 8068,95  | 7982,3   | 11065,17 | 5692,865   | 9523,735  | -3830,87   |
| <b>NCS1</b>      | 47,09    | 1794,92  | 142,86   | 56,76    | 8662     | 0        | 510,4075   | 4331      | -3820,5925 |

|          |          |          |          |          |          |          |            |           |            |
|----------|----------|----------|----------|----------|----------|----------|------------|-----------|------------|
| FOXN3    | 2449,85  | 6955,44  | 2578,59  | 2046,97  | 6128,81  | 8521,74  | 3507,7125  | 7325,275  | -3817,5625 |
| RACGAP1  | 4151,76  | 5287,24  | 2273,46  | 5445,01  | 6035,41  | 10177,63 | 4289,3675  | 8106,52   | -3817,1525 |
| ARHGAP19 | 5029,51  | 4385,44  | 2507,24  | 2182,88  | 8415,76  | 6265     | 3526,2675  | 7340,38   | -3814,1125 |
| TMED8    | 3201,63  | 3648,02  | 3469,41  | 1734,16  | 5689,19  | 7950,79  | 3013,305   | 6819,99   | -3806,685  |
| KIF2A    | 7286,2   | 8788,73  | 3372,91  | 4086,84  | 5418,75  | 13953,97 | 5883,67    | 9686,36   | -3802,69   |
| IPO9     | 18798,37 | 9381,83  | 9145,58  | 10544,47 | 21811,63 | 9716,37  | 11967,5625 | 15764     | -3796,4375 |
| DNM1     | 397,92   | 1130,86  | 969,61   | 112,36   | 350,93   | 8545,23  | 652,6875   | 4448,08   | -3795,3925 |
| PAK2     | 9791     | 15406,17 | 7072,95  | 11098,62 | 11098,6  | 18173,84 | 10842,185  | 14636,22  | -3794,035  |
| ARHGAP5  | 825,35   | 2241,12  | 912,81   | 2,21     | 44,21    | 9532,94  | 995,3725   | 4788,575  | -3793,2025 |
| ATG13    | 3907,09  | 5955,42  | 8972,62  | 5726,28  | 13626,21 | 6233,51  | 6140,3525  | 9929,86   | -3789,5075 |
| HENMT1   | 2726,45  | 1,09     | 7301,08  | 62,7     | 2169,38  | 10454,09 | 2522,83    | 6311,735  | -3788,905  |
| CDK5RAP3 | 4969,69  | 8336,78  | 8813,69  | 8068,76  | 11447,63 | 11220,59 | 7547,23    | 11334,11  | -3786,88   |
| SYPL1    | 7627,84  | 4589,44  | 6143,11  | 5692,57  | 10900,4  | 8699,58  | 6013,24    | 9799,99   | -3786,75   |
| PTPN12   | 4812,42  | 3792,04  | 2354,89  | 3153,49  | 9532,88  | 5089,34  | 3528,21    | 7311,11   | -3782,9    |
| TUBA8    | 8,5      | 37,12    | 135,16   | 19,81    | 2874,5   | 4787,87  | 50,1475    | 3831,185  | -3781,0375 |
| SPARC    | 2543,27  | 1060,44  | 3639,54  | 522,53   | 6,03     | 11435,08 | 1941,445   | 5720,555  | -3779,11   |
| NUMB     | 2687,13  | 5279,22  | 2097,73  | 2037,46  | 6837,67  | 6746,51  | 3025,385   | 6792,09   | -3766,705  |
| BSG      | 27301,54 | 30018,86 | 44791,62 | 8125,91  | 41691,18 | 20957,85 | 27559,4825 | 31324,515 | -3765,0325 |
| TM9SF3   | 9248,86  | 10626,17 | 4575,93  | 9345,5   | 7588,94  | 16838,11 | 8449,115   | 12213,525 | -3764,41   |
| HEBP2    | 864,1    | 1295,99  | 1393,1   | 3493,86  | 9908,82  | 1140,8   | 1761,7625  | 5524,81   | -3763,0475 |
| ZNF292   | 7515,23  | 3282,9   | 6852,64  | 8787,66  | 12508,48 | 8234,7   | 6609,6075  | 10371,59  | -3761,9825 |
| PAN3     | 3332,34  | 3807,44  | 2034,45  | 2722,42  | 9735,18  | 3735,48  | 2974,1625  | 6735,33   | -3761,1675 |
| AP1S2    | 5176,51  | 3106,12  | 1851,65  | 4684,55  | 10894,24 | 4034,23  | 3704,7075  | 7464,235  | -3759,5275 |
| PTBP1    | 39904,11 | 53582,78 | 22657,85 | 28541,87 | 49270,32 | 30558,79 | 36171,6525 | 39914,555 | -3742,9025 |
| ABCA2    | 1893,03  | 6575,9   | 3600,81  | 3002,8   | 10250,66 | 4763,31  | 3768,135   | 7506,985  | -3738,85   |
| DCK      | 6261,8   | 2209,37  | 2554,27  | 5762,26  | 4154,68  | 11716,54 | 4196,925   | 7935,61   | -3738,685  |
| NUF2     | 3931,89  | 2082,88  | 1908,33  | 3421,85  | 7749,5   | 5400,26  | 2836,2375  | 6574,88   | -3738,6425 |
| AVL9     | 2585,84  | 3527,8   | 3118,24  | 2968,07  | 6461,29  | 7097,85  | 3049,9875  | 6779,57   | -3729,5825 |
| ARPC5    | 15087,51 | 10785,49 | 6350,85  | 17134,18 | 13229,07 | 18897,39 | 12339,5075 | 16063,23  | -3723,7225 |
| BNIP3    | 13508,61 | 17580,88 | 9769,86  | 7392,97  | 31340,35 | 231,16   | 12063,08   | 15785,755 | -3722,675  |
| DAPK1    | 3272,61  | 10859,89 | 6629,83  | 10359,66 | 4722,26  | 18276,86 | 7780,4975  | 11499,56  | -3719,0625 |
| FEM1B    | 3321,92  | 3692,66  | 1661,57  | 3500,32  | 7181,15  | 6335,19  | 3044,1175  | 6758,17   | -3714,0525 |
| FAM168A  | 2836,73  | 3099,85  | 2141     | 2006,33  | 5013,09  | 7453,93  | 2520,9775  | 6233,51   | -3712,5325 |

|                   |          |          |          |         |          |          |            |           |            |
|-------------------|----------|----------|----------|---------|----------|----------|------------|-----------|------------|
| <b>TUG1</b>       | 9776,39  | 11425,34 | 6993     | 7571,35 | 6905,08  | 18391,07 | 8941,52    | 12648,075 | -3706,555  |
| <b>CPD</b>        | 3319,01  | 3044,38  | 2669,81  | 2311,88 | 5425,77  | 7656,39  | 2836,27    | 6541,08   | -3704,81   |
| <b>CLSTN1</b>     | 6997,45  | 3150,1   | 6719,37  | 8397,01 | 10044,56 | 9982,08  | 6315,9825  | 10013,32  | -3697,3375 |
| <b>CDC7</b>       | 4795,97  | 2314,64  | 1814,77  | 3428,63 | 1996,1   | 11570,94 | 3088,5025  | 6783,52   | -3695,0175 |
| <b>DNAJC13</b>    | 3651,27  | 3180,4   | 4225,8   | 3383,44 | 10809,26 | 3789,5   | 3610,2275  | 7299,38   | -3689,1525 |
| <b>KDM5B</b>      | 10671,84 | 13678,68 | 10027,39 | 6995,92 | 14709,42 | 13322,05 | 10343,4575 | 14015,735 | -3672,2775 |
| <b>AC098850.3</b> | 304,08   | 598,95   | 343,45   | 629,07  | 3736,19  | 4543,81  | 468,8875   | 4140      | -3671,1125 |
| <b>AP3S1</b>      | 2785,49  | 2614,02  | 3324,47  | 2405,97 | 8497,16  | 4409,12  | 2782,4875  | 6453,14   | -3670,6525 |
| <b>GPT2</b>       | 1124,09  | 1448,04  | 3072,75  | 5452,74 | 4146,95  | 8741,74  | 2774,405   | 6444,345  | -3669,94   |
| <b>FLT3</b>       | 0        | 0        | 3,78     | 0       | 6626,27  | 710,88   | 0,945      | 3668,575  | -3667,63   |
| <b>EV12A</b>      | 53,34    | 459,07   | 41,71    | 0       | 7435,32  | 170,55   | 138,53     | 3802,935  | -3664,405  |
| <b>RASA1</b>      | 2718,14  | 7348,45  | 1669,85  | 1799,16 | 8698,83  | 5392,92  | 3383,9     | 7045,875  | -3661,975  |
| <b>SRGAP2C</b>    | 1318,65  | 679,42   | 614,1    | 1489,9  | 7898,69  | 1476,08  | 1025,5175  | 4687,385  | -3661,8675 |
| <b>TAF1D</b>      | 13466,46 | 4932,31  | 5512,01  | 8746,95 | 20092,98 | 3557,55  | 8164,4325  | 11825,265 | -3660,8325 |
| <b>TCF12</b>      | 4370,97  | 5217,74  | 4690,51  | 3859,75 | 4704,03  | 11686,01 | 4534,7425  | 8195,02   | -3660,2775 |
| <b>ZNF469</b>     | 316,59   | 62,51    | 102,05   | 434,42  | 297,44   | 7479,01  | 228,8925   | 3888,225  | -3659,3325 |
| <b>NBR1</b>       | 2702,44  | 5855,8   | 2267,44  | 3181,14 | 4883,9   | 9437,74  | 3501,705   | 7160,82   | -3659,115  |
| <b>NF1</b>        | 2727,19  | 4216,96  | 1813,98  | 2316,68 | 5790,38  | 7061,14  | 2768,7025  | 6425,76   | -3657,0575 |
| <b>RALB</b>       | 3581,53  | 3099,11  | 3586,55  | 7078,66 | 8432,37  | 7550,47  | 4336,4625  | 7991,42   | -3654,9575 |
| <b>PAFAH1B1</b>   | 3903,75  | 6621,51  | 6737,39  | 7244,85 | 14464    | 5081,13  | 6126,875   | 9772,565  | -3645,69   |
| <b>RC3H2</b>      | 3633,95  | 3395,63  | 2144,92  | 3594    | 3823,75  | 9851,75  | 3192,125   | 6837,75   | -3645,625  |
| <b>UBE2Q1</b>     | 5955,11  | 4449,89  | 6125,19  | 5410,68 | 13266,35 | 4988,58  | 5485,2175  | 9127,465  | -3642,2475 |
| <b>EVI2B</b>      | 231,7    | 810,8    | 128,51   | 1,39    | 5250,25  | 2616,25  | 293,1      | 3933,25   | -3640,15   |
| <b>EXOC4</b>      | 4400,83  | 5437,54  | 5681,99  | 4153,43 | 8942,62  | 8173,97  | 4918,4475  | 8558,295  | -3639,8475 |
| <b>FNIP1</b>      | 2042,28  | 1838,74  | 1139,71  | 1725,39 | 5043,96  | 5589,74  | 1686,53    | 5316,85   | -3630,32   |
| <b>INPP4B</b>     | 114,84   | 665,38   | 373,32   | 48,38   | 6044,1   | 1816,96  | 300,48     | 3930,53   | -3630,05   |
| <b>PARP8</b>      | 468,8    | 132,57   | 698,13   | 342,01  | 6229     | 1841,28  | 410,3775   | 4035,14   | -3624,7625 |
| <b>TOPBP1</b>     | 9559,19  | 8431,13  | 4568,96  | 6930,44 | 7287,02  | 14706,33 | 7372,43    | 10996,675 | -3624,245  |
| <b>LRRC8C</b>     | 817,32   | 1147,97  | 740,34   | 1046,13 | 7222,31  | 1895,94  | 937,94     | 4559,125  | -3621,185  |
| <b>RAB34</b>      | 8,52     | 1,65     | 17,95    | 3,76    | 7246,57  | 8,12     | 7,97       | 3627,345  | -3619,375  |
| <b>ATP6V1G1</b>   | 5414,76  | 4261,58  | 4161,55  | 3783,13 | 6997,74  | 9048,13  | 4405,255   | 8022,935  | -3617,68   |
| <b>RNASE6</b>     | 729,25   | 107,12   | 417,84   | 81,03   | 7866,23  | 29,71    | 333,81     | 3947,97   | -3614,16   |
| <b>USP13</b>      | 863,67   | 354,31   | 145,12   | 39,82   | 5394,86  | 2531,64  | 350,73     | 3963,25   | -3612,52   |

|          |          |          |          |          |          |          |            |           |            |
|----------|----------|----------|----------|----------|----------|----------|------------|-----------|------------|
| CTSC     | 22932,07 | 10429,76 | 10009,68 | 12019,64 | 22434,51 | 12468,94 | 13847,7875 | 17451,725 | -3603,9375 |
| RPL22L1  | 2874,46  | 3844,11  | 1210,08  | 1071,22  | 10892,88 | 813,15   | 2249,9675  | 5853,015  | -3603,0475 |
| ZFP91    | 6352,88  | 7407,69  | 4681,59  | 6014,99  | 10250,12 | 9178,5   | 6114,2875  | 9714,31   | -3600,0225 |
| NMNAT3   | 1398,41  | 133,27   | 2196,47  | 54,82    | 4047,59  | 5029,51  | 945,7425   | 4538,55   | -3592,8075 |
| GOLM2    | 2422,51  | 2203,29  | 1757,29  | 4345,01  | 6404,61  | 6142,35  | 2682,025   | 6273,48   | -3591,455  |
| HTT      | 4242,35  | 6791,69  | 3584,66  | 3418,27  | 3453,86  | 12739,53 | 4509,2425  | 8096,695  | -3587,4525 |
| CPNE8    | 1411,34  | 510,84   | 790,84   | 858,36   | 8950,58  | 0        | 892,845    | 4475,29   | -3582,445  |
| ITPR1    | 5586,27  | 1798,87  | 2882,96  | 4731,94  | 9735     | 4918,43  | 3750,01    | 7326,715  | -3576,705  |
| TCEA1    | 12639,54 | 9706,18  | 6530,49  | 10555,19 | 19395,23 | 7470,57  | 9857,85    | 13432,9   | -3575,05   |
| HLTF     | 8908,37  | 5453,54  | 6888,59  | 8953,2   | 3284,36  | 18963,81 | 7550,925   | 11124,085 | -3573,16   |
| MAPK14   | 7186,61  | 8491,08  | 7910,56  | 6165,26  | 6571,63  | 15450,98 | 7438,3775  | 11011,305 | -3572,9275 |
| PTTG1IP  | 11602,38 | 15585,21 | 28018,02 | 11697,87 | 27339,02 | 13256,49 | 16725,87   | 20297,755 | -3571,885  |
| PRELID3B | 4643,06  | 4333,47  | 3360,88  | 6248,65  | 6548,52  | 9888,18  | 4646,515   | 8218,35   | -3571,835  |
| CDHR1    | 0        | 0        | 2,63     | 0        | 7135,07  | 0        | 0,6575     | 3567,535  | -3566,8775 |
| PPIG     | 14605,35 | 8476,1   | 14546,43 | 9923,93  | 21602,4  | 9299,96  | 11887,9525 | 15451,18  | -3563,2275 |
| ARHGAP32 | 3,84     | 0        | 0        | 0        | 1684,55  | 5434,21  | 0,96       | 3559,38   | -3558,42   |
| RMI1     | 1144,27  | 1421,62  | 419,08   | 1837,88  | 1502,49  | 8024,99  | 1205,7125  | 4763,74   | -3558,0275 |
| EXOSC7   | 3960,94  | 2815,98  | 4158,15  | 1866,95  | 12093,83 | 1376,25  | 3200,505   | 6735,04   | -3534,535  |
| CREBZF   | 9270,74  | 8142,2   | 4892,26  | 10548,56 | 11397,01 | 12095,34 | 8213,44    | 11746,175 | -3532,735  |
| ADA2     | 28,07    | 108,09   | 0        | 0        | 2539,38  | 4569,46  | 34,04      | 3554,42   | -3520,38   |
| NCR3LG1  | 226,99   | 1215,78  | 421,17   | 1564,1   | 895,38   | 7849,2   | 857,01     | 4372,29   | -3515,28   |
| ZFHX3    | 243,35   | 672,24   | 128,96   | 88,33    | 88,71    | 7507,28  | 283,22     | 3797,995  | -3514,775  |
| CYBC1    | 3598,74  | 3373,53  | 10022,23 | 4190,7   | 15014,72 | 2595,74  | 5296,3     | 8805,23   | -3508,93   |
| CHCHD10  | 1039,31  | 996,27   | 883,91   | 1829,32  | 9000,48  | 388,65   | 1187,2025  | 4694,565  | -3507,3625 |
| RASSF2   | 2094,65  | 1415,62  | 3044,04  | 1025,34  | 6779,41  | 4021,18  | 1894,9125  | 5400,295  | -3505,3825 |
| TXNL4B   | 729,78   | 1186,5   | 682,02   | 1206,33  | 644,51   | 8268,35  | 951,1575   | 4456,43   | -3505,2725 |
| SPG11    | 4385,36  | 4706,44  | 4951,44  | 4150,96  | 8803,57  | 7304,01  | 4548,55    | 8053,79   | -3505,24   |
| ZNF24    | 6747,17  | 5444,35  | 2873,41  | 5545,56  | 6250,41  | 11053,72 | 5152,6225  | 8652,065  | -3499,4425 |
| CBX1     | 5833,08  | 5731,39  | 4518     | 5245,76  | 8594,12  | 9067,95  | 5332,0575  | 8831,035  | -3498,9775 |
| RBM6     | 8172,88  | 6733,98  | 12910,71 | 5588,48  | 13787,92 | 9894,01  | 8351,5125  | 11840,965 | -3489,4525 |
| DNAJC10  | 5109,23  | 3716,8   | 1718,59  | 3596,55  | 2578,34  | 11468,58 | 3535,2925  | 7023,46   | -3488,1675 |
| SERINC3  | 7444,6   | 10659,69 | 12140,53 | 12209,26 | 8801,7   | 19393,09 | 10613,52   | 14097,395 | -3483,875  |
| ZMYM2    | 3044,74  | 6149,09  | 2255,75  | 2757,65  | 8086,73  | 5982,32  | 3551,8075  | 7034,525  | -3482,7175 |



|          |          |          |          |          |          |          |            |           |            |
|----------|----------|----------|----------|----------|----------|----------|------------|-----------|------------|
| PUM2     | 9597,56  | 9182,09  | 5567,31  | 4447,43  | 11692,14 | 9655,48  | 7198,5975  | 10673,81  | -3475,2125 |
| SLC38A2  | 12143,28 | 15579,03 | 9597,1   | 13560,2  | 14525,41 | 17861,95 | 12719,9025 | 16193,68  | -3473,7775 |
| STMP1    | 2365,67  | 3974,7   | 4133,71  | 3197,4   | 7527,61  | 6239,09  | 3417,87    | 6883,35   | -3465,48   |
| CBWD5    | 1196,37  | 1489,88  | 1433,69  | 1557,87  | 7386,74  | 2362,9   | 1419,4525  | 4874,82   | -3455,3675 |
| MCL1     | 9135,98  | 19206,08 | 14711,93 | 13130,86 | 25518,07 | 9482,45  | 14046,2125 | 17500,26  | -3454,0475 |
| RMND5A   | 8082,76  | 7036,55  | 4402,42  | 6056,63  | 5775,01  | 13915,42 | 6394,59    | 9845,215  | -3450,625  |
| GOLPH3   | 5683,69  | 6364,91  | 8090,87  | 6998,68  | 12584,78 | 7882,71  | 6784,5375  | 10233,745 | -3449,2075 |
| MAPKAPK2 | 11669,44 | 5762,93  | 8851,19  | 13321,36 | 21421,96 | 5274,25  | 9901,23    | 13348,105 | -3446,875  |
| DENND1A  | 2232,15  | 2788,46  | 2042,11  | 2962,52  | 10448,18 | 1457,95  | 2506,31    | 5953,065  | -3446,755  |
| SLC39A9  | 5675,82  | 4451,6   | 3164,19  | 3951,95  | 6519,58  | 8992,01  | 4310,89    | 7755,795  | -3444,905  |
| TNRC6C   | 601,57   | 1184,2   | 988,4    | 809,46   | 2357,53  | 6308,86  | 895,9075   | 4333,195  | -3437,2875 |
| SPART    | 3612,09  | 5020,18  | 1        | 5647,99  | 13998,14 | 11,55    | 3570,315   | 7004,845  | -3434,53   |
| KCTD3    | 5081,91  | 2686,34  | 1364,75  | 1550,07  | 5916,68  | 6270,93  | 2670,7675  | 6093,805  | -3423,0375 |
| CENPH    | 3267,81  | 2879,15  | 1910,2   | 1385,63  | 5519,1   | 6037,59  | 2360,6975  | 5778,345  | -3417,6475 |
| ARNT     | 2359,13  | 4731,55  | 2055,64  | 3196,46  | 9023,85  | 3982,44  | 3085,695   | 6503,145  | -3417,45   |
| AKR1B1   | 5277,75  | 4032,64  | 4706,26  | 8,03     | 6539,59  | 7295,18  | 3506,17    | 6917,385  | -3411,215  |
| KLF13    | 3968,32  | 9125,3   | 4632,61  | 7170,37  | 6201,78  | 13058,22 | 6224,15    | 9630      | -3405,85   |
| UCK2     | 12634,42 | 6054,27  | 4370,66  | 5677,49  | 17915,97 | 3259,05  | 7184,21    | 10587,51  | -3403,3    |
| CD68     | 1595,02  | 2076,1   | 8957,31  | 15988,28 | 21017,87 | 90,2     | 7154,1775  | 10554,035 | -3399,8575 |
| SV2A     | 13,53    | 5413,63  | 10,55    | 36,61    | 965,39   | 8569,33  | 1368,58    | 4767,36   | -3398,78   |
| RHOU     | 86,63    | 1,51     | 16,53    | 903,66   | 4522,09  | 2778,71  | 252,0825   | 3650,4    | -3398,3175 |
| YY1AP1   | 6042,46  | 6572,12  | 7080,28  | 7918,35  | 14815,7  | 5787,33  | 6903,3025  | 10301,515 | -3398,2125 |
| GAS7     | 0        | 19,23    | 17,44    | 8,1      | 5831,73  | 981,45   | 11,1925    | 3406,59   | -3395,3975 |
| SPTLC1   | 2090,22  | 3967,9   | 3226,96  | 5849,71  | 5393,08  | 8945,47  | 3783,6975  | 7169,275  | -3385,5775 |
| STX16    | 5058,01  | 6870,95  | 5822,87  | 4859,52  | 5430,61  | 12643,63 | 5652,8375  | 9037,12   | -3384,2825 |
| SORL1    | 63,26    | 121,47   | 26,29    | 27,18    | 2366,24  | 4509,8   | 59,55      | 3438,02   | -3378,47   |
| PPA1     | 11416,93 | 12691,47 | 4985,27  | 6405,72  | 19804,36 | 4667,95  | 8874,8475  | 12236,155 | -3361,3075 |
| ZNF438   | 371,47   | 369,57   | 554,08   | 344,69   | 6968,46  | 564,05   | 409,9525   | 3766,255  | -3356,3025 |
| ADGRL1   | 431,78   | 899,56   | 1865,91  | 1381,67  | 548,01   | 8442,5   | 1144,73    | 4495,255  | -3350,525  |
| PPP3R1   | 11318,64 | 8629,7   | 6390,8   | 12260,92 | 9567,39  | 16433,12 | 9650,015   | 13000,255 | -3350,24   |
| BLM      | 4810,78  | 2585,95  | 3960,04  | 4200,1   | 4397,17  | 10070,28 | 3889,2175  | 7233,725  | -3344,5075 |
| SLC39A6  | 1325,7   | 1419,79  | 765,3    | 1200,39  | 5040,02  | 4002,64  | 1177,795   | 4521,33   | -3343,535  |
| AMZ2     | 2220,25  | 2722,99  | 2205,71  | 1362,15  | 7031,68  | 3908,78  | 2127,775   | 5470,23   | -3342,455  |

|          |          |          |          |          |          |          |           |           |            |
|----------|----------|----------|----------|----------|----------|----------|-----------|-----------|------------|
| ITFG1    | 2837,27  | 2163,31  | 1174,26  | 4906,09  | 4424     | 7800,59  | 2770,2325 | 6112,295  | -3342,0625 |
| RAB7A    | 15391,26 | 13578,54 | 13136,64 | 10963,56 | 17332,44 | 15885,25 | 13267,5   | 16608,845 | -3341,345  |
| ARPP19   | 7278,62  | 7485,29  | 3985,59  | 7743,06  | 5232,07  | 14696,82 | 6623,14   | 9964,445  | -3341,305  |
| UBE2E1   | 7013,85  | 6896,76  | 4210,44  | 5101,19  | 8511,74  | 9777,35  | 5805,56   | 9144,545  | -3338,985  |
| ACAT2    | 8514,12  | 3626,9   | 3582,36  | 7037,93  | 6297,14  | 11744    | 5690,3275 | 9020,57   | -3330,2425 |
| ZC3H18   | 5847,07  | 6715,47  | 4469,87  | 4750,24  | 4902,1   | 12648,2  | 5445,6625 | 8775,15   | -3329,4875 |
| PTPN2    | 3376,2   | 2710,19  | 1460,98  | 3757,65  | 9985,12  | 2325,76  | 2826,255  | 6155,44   | -3329,185  |
| DBI      | 2618,53  | 2650,15  | 4800,33  | 1980,84  | 10152,32 | 2529,06  | 3012,4625 | 6340,69   | -3328,2275 |
| SFXN1    | 4754,16  | 3468,31  | 607,2    | 3561,32  | 5026,5   | 7822,74  | 3097,7475 | 6424,62   | -3326,8725 |
| HACD4    | 0        | 19,61    | 460,08   | 0        | 1281,83  | 5611,6   | 119,9225  | 3446,715  | -3326,7925 |
| OSBPL5   | 807,14   | 6474,35  | 3907,12  | 2049,9   | 12389,35 | 878,98   | 3309,6275 | 6634,165  | -3324,5375 |
| RHEB     | 5312,63  | 3195,14  | 3910,68  | 4153,84  | 6727,36  | 8185,97  | 4143,0725 | 7456,665  | -3313,5925 |
| MAPK6    | 5633,81  | 2864,13  | 3569,8   | 4645,4   | 7495,76  | 7480,56  | 4178,285  | 7488,16   | -3309,875  |
| ZFP1     | 801,53   | 758,5    | 328,44   | 580,2    | 615,3    | 7234,94  | 617,1675  | 3925,12   | -3307,9525 |
| KIF11    | 8691,63  | 7584,88  | 2978,12  | 5479,87  | 5156,12  | 13823,88 | 6183,625  | 9490      | -3306,375  |
| MAP1LC3B | 3833,07  | 4415,54  | 3409,19  | 3242,73  | 3870,8   | 10186,23 | 3725,1325 | 7028,515  | -3303,3825 |
| KNL1     | 4427,72  | 2881,1   | 1821,33  | 3063,11  | 3045,09  | 9652,24  | 3048,315  | 6348,665  | -3300,35   |
| TLK1     | 3164,46  | 4239,21  | 2526,88  | 3608,38  | 2417,73  | 10930,33 | 3384,7325 | 6674,03   | -3289,2975 |
| IDH2     | 12632,23 | 27518,85 | 20772,82 | 9692,22  | 10016,67 | 31855,88 | 17654,03  | 20936,275 | -3282,245  |
| COX7A2   | 8464,44  | 6559,73  | 12305,59 | 7935,13  | 16321,75 | 7862,64  | 8816,2225 | 12092,195 | -3275,9725 |
| ZC3HAV1  | 8008,97  | 7566,11  | 9781,87  | 6118,07  | 13627,93 | 8661,11  | 7868,755  | 11144,52  | -3275,765  |
| FBXL5    | 1554,02  | 1980,42  | 1607,87  | 2077,71  | 7046,7   | 3113,19  | 1805,005  | 5079,945  | -3274,94   |
| ITCH     | 3080,84  | 3226,26  | 1927,55  | 3869,27  | 3627,67  | 8968,11  | 3025,98   | 6297,89   | -3271,91   |
| SMC5     | 1830,64  | 3414,18  | 1339,83  | 3727,16  | 2607,02  | 9088,49  | 2577,9525 | 5847,755  | -3269,8025 |
| ACADM    | 5540,2   | 8424,99  | 4616,12  | 4396,81  | 8285,66  | 9733,84  | 5744,53   | 9009,75   | -3265,22   |
| TSC22D3  | 53,7     | 192,59   | 100,84   | 58,46    | 2400,54  | 4327,88  | 101,3975  | 3364,21   | -3262,8125 |
| PLK4     | 4649,34  | 3008,63  | 1754,56  | 3320,87  | 6174,43  | 6702,08  | 3183,35   | 6438,255  | -3254,905  |
| FEZ2     | 1116,11  | 1287,93  | 1923,32  | 877,95   | 8490,79  | 611,07   | 1301,3275 | 4550,93   | -3249,6025 |
| SPAG9    | 2874,64  | 3200,08  | 1875,83  | 4206,5   | 4494,82  | 8073,39  | 3039,2625 | 6284,105  | -3244,8425 |
| ZHX3     | 476,87   | 1747,96  | 954,93   | 1813,47  | 4310,54  | 4675,03  | 1248,3075 | 4492,785  | -3244,4775 |
| PSTPIP1  | 6        | 7,52     | 1,45     | 5,06     | 6493,07  | 3,1      | 5,0075    | 3248,085  | -3243,0775 |
| ZFAND5   | 4122,24  | 7371,04  | 5148,7   | 6845,69  | 10406,82 | 7811,95  | 5871,9175 | 9109,385  | -3237,4675 |
| CENPE    | 3923,9   | 3426,33  | 2525,36  | 3683,67  | 5283,89  | 7970,11  | 3389,815  | 6627      | -3237,185  |

|          |          |          |          |          |          |          |           |           |            |
|----------|----------|----------|----------|----------|----------|----------|-----------|-----------|------------|
| HLA-C    | 5016,37  | 27482,49 | 74062,33 | 5600,59  | 48890,84 | 13663,5  | 28040,445 | 31277,17  | -3236,725  |
| GTF2H2C  | 4207,99  | 2145,65  | 842,75   | 2770,5   | 6099,73  | 5352,47  | 2491,7225 | 5726,1    | -3234,3775 |
| IKZF1    | 5773,21  | 7667,67  | 3789,23  | 8112,24  | 8655,41  | 10480,55 | 6335,5875 | 9567,98   | -3232,3925 |
| ABR      | 368,33   | 1945,98  | 25,75    | 45,73    | 5117,78  | 2538,65  | 596,4475  | 3828,215  | -3231,7675 |
| DIDO1    | 5284,88  | 7094,08  | 4883,25  | 8587,8   | 3987,04  | 15399,92 | 6462,5025 | 9693,48   | -3230,9775 |
| SRGAP2B  | 801,2    | 457,69   | 308,85   | 1903,93  | 6552,4   | 1643,42  | 867,9175  | 4097,91   | -3229,9925 |
| MX2      | 0        | 8,55     | 150,91   | 0        | 3081,42  | 3453,57  | 39,865    | 3267,495  | -3227,63   |
| C4orf3   | 5493,72  | 5558,78  | 5410,33  | 3727,55  | 11220,91 | 5314,54  | 5047,595  | 8267,725  | -3220,13   |
| MAP1LC3A | 112,49   | 0        | 1,78     | 152,05   | 6547,29  | 0,85     | 66,58     | 3274,07   | -3207,49   |
| KNTC1    | 11180,09 | 6419,66  | 4869,78  | 5486,56  | 9277,45  | 11114,5  | 6989,0225 | 10195,975 | -3206,9525 |
| STAU1    | 7050,87  | 6908,76  | 6582,32  | 11377,14 | 5371,08  | 16997,67 | 7979,7725 | 11184,375 | -3204,6025 |
| ING1     | 2163,71  | 1457,65  | 2346,84  | 1234,55  | 1789,63  | 8213,99  | 1800,6875 | 5001,81   | -3201,1225 |
| VPS35    | 9805,39  | 7716,96  | 6670,2   | 24962,61 | 9109,89  | 21868,96 | 12288,79  | 15489,425 | -3200,635  |
| PRKAA1   | 2724,65  | 2499,63  | 4280,5   | 2903,51  | 8653,77  | 3934,68  | 3102,0725 | 6294,225  | -3192,1525 |
| EFHD2    | 3675,92  | 6705,71  | 6343,78  | 6334,78  | 10350,44 | 7559,23  | 5765,0475 | 8954,835  | -3189,7875 |
| GLIPR1   | 71,2     | 29,01    | 177,13   | 211,74   | 6219,43  | 400,57   | 122,27    | 3310      | -3187,73   |
| MRPL44   | 2444,98  | 2887,64  | 2182,84  | 2858,39  | 9934,86  | 1625,29  | 2593,4625 | 5780,075  | -3186,6125 |
| ACAP2    | 2425,44  | 2650,74  | 1137,4   | 3237     | 5427,71  | 5670,47  | 2362,645  | 5549,09   | -3186,445  |
| MID1IP1  | 10419,59 | 7827,93  | 3231,88  | 3551,68  | 12360,41 | 6525,59  | 6257,77   | 9443      | -3185,23   |
| PYCARD   | 3135,65  | 2299,2   | 5156,05  | 3285,16  | 11457,04 | 1850,17  | 3469,015  | 6653,605  | -3184,59   |
| ZNF131   | 3778,59  | 2520,75  | 5951,85  | 2507,94  | 9515,62  | 4207,16  | 3689,7825 | 6861,39   | -3171,6075 |
| LEO1     | 4445,72  | 3140,75  | 3705     | 3231,64  | 8246,5   | 5354,97  | 3630,7775 | 6800,735  | -3169,9575 |
| ATP8B2   | 3281,9   | 1982,64  | 3402,39  | 2640,04  | 2272,88  | 9718,55  | 2826,7425 | 5995,715  | -3168,9725 |
| ECT2     | 2323,68  | 1794,9   | 1344,37  | 2989,2   | 3116,54  | 7447,19  | 2113,0375 | 5281,865  | -3168,8275 |
| WASF1    | 777,37   | 6583,67  | 1639,18  | 3094,54  | 3012,61  | 9366,83  | 3023,69   | 6189,72   | -3166,03   |
| CHMP1A   | 4688,8   | 8107,88  | 5558,74  | 4820,45  | 4303,64  | 13609,95 | 5793,9675 | 8956,795  | -3162,8275 |
| PDE4D    | 7,54     | 6,69     | 882,67   | 96,97    | 5423,35  | 1396,08  | 248,4675  | 3409,715  | -3161,2475 |
| HS2ST1   | 5044,22  | 4761,6   | 3564,47  | 6528,13  | 3345,18  | 12911,33 | 4974,605  | 8128,255  | -3153,65   |
| BROX     | 2869,75  | 2014,69  | 1279,97  | 1833,96  | 5421     | 4882,55  | 1999,5925 | 5151,775  | -3152,1825 |
| RECQL    | 2833,1   | 3607,98  | 2206,62  | 3771,41  | 2477,87  | 10030,36 | 3104,7775 | 6254,115  | -3149,3375 |
| ADAP1    | 478,98   | 407,29   | 42,62    | 119,7    | 6286,27  | 535,42   | 262,1475  | 3410,845  | -3148,6975 |
| YME1L1   | 9857,47  | 11221,97 | 9381,05  | 12131,37 | 12887,44 | 14704,68 | 10647,965 | 13796,06  | -3148,095  |
| AIMP1    | 6809,87  | 4702,68  | 4115,56  | 5766,67  | 11989,74 | 5002,58  | 5348,695  | 8496,16   | -3147,465  |

|                |          |          |          |          |          |          |           |           |            |
|----------------|----------|----------|----------|----------|----------|----------|-----------|-----------|------------|
| <b>MT1F</b>    | 0        | 85,13    | 87,12    | 217,28   | 6489,26  | 0        | 97,3825   | 3244,63   | -3147,2475 |
| <b>C5orf22</b> | 1551,67  | 1071,72  | 1708,73  | 1696,75  | 5049,98  | 4245,85  | 1507,2175 | 4647,915  | -3140,6975 |
| <b>PTGER4</b>  | 7,07     | 1424,96  | 75,3     | 85,53    | 6038,78  | 1038,09  | 398,215   | 3538,435  | -3140,22   |
| <b>ZKSCAN1</b> | 3983,59  | 4695,26  | 3695,87  | 3549,44  | 8529,05  | 5710,73  | 3981,04   | 7119,89   | -3138,85   |
| <b>HIF1A</b>   | 3630,63  | 4608,73  | 2541,3   | 3152,54  | 5335,62  | 7907,54  | 3483,3    | 6621,58   | -3138,28   |
| <b>SRCAP</b>   | 5159,82  | 10071,96 | 2845,83  | 7257,35  | 2310,44  | 16633,2  | 6333,74   | 9471,82   | -3138,08   |
| <b>MARCHF7</b> | 5340,46  | 6126,51  | 2960,73  | 7013,19  | 7859,88  | 9127,29  | 5360,2225 | 8493,585  | -3133,3625 |
| <b>MAGEF1</b>  | 895,43   | 1755,37  | 728,23   | 1413,44  | 2391,12  | 6264,34  | 1198,1175 | 4327,73   | -3129,6125 |
| <b>IREB2</b>   | 8377,08  | 6135,84  | 6013,87  | 6195,29  | 7286,07  | 12320,41 | 6680,52   | 9803,24   | -3122,72   |
| <b>ANO6</b>    | 4659,34  | 3365,91  | 2097,1   | 4827,73  | 6833,48  | 6877,34  | 3737,52   | 6855,41   | -3117,89   |
| <b>FRY</b>     | 1545,64  | 616,61   | 770,09   | 1064,63  | 7230,6   | 995,88   | 999,2425  | 4113,24   | -3113,9975 |
| <b>MTDH</b>    | 16628,94 | 14062,32 | 9626,08  | 13124,3  | 25316,3  | 7632,16  | 13360,41  | 16474,23  | -3113,82   |
| <b>COPS6</b>   | 8282,49  | 4872,12  | 6016,81  | 5432,03  | 13364,08 | 5163,96  | 6150,8625 | 9264,02   | -3113,1575 |
| <b>PCMTD2</b>  | 1901,57  | 2773,18  | 2038,48  | 3043,36  | 1870,61  | 9229,07  | 2439,1475 | 5549,84   | -3110,6925 |
| <b>RAB24</b>   | 3115,11  | 3641,91  | 4500,8   | 4823,18  | 12370,2  | 1878,49  | 4020,25   | 7124,345  | -3104,095  |
| <b>SPATA6</b>  | 0        | 0        | 9,46     | 0        | 5290,79  | 922,08   | 2,365     | 3106,435  | -3104,07   |
| <b>NCAPD2</b>  | 18206,19 | 18836,06 | 9556,85  | 12389,42 | 14447,8  | 21253,23 | 14747,13  | 17850,515 | -3103,385  |
| <b>AGT</b>     | 165,76   | 53,6     | 104,89   | 20,6     | 6309,54  | 64,76    | 86,2125   | 3187,15   | -3100,9375 |
| <b>CDK19</b>   | 1385,38  | 1596,71  | 2197,09  | 4673,57  | 2757,73  | 8363,54  | 2463,1875 | 5560,635  | -3097,4475 |
| <b>PRDX2</b>   | 11528,53 | 8230     | 8008,82  | 4102,67  | 12879,34 | 9246,31  | 7967,505  | 11062,825 | -3095,32   |
| <b>HIPK1</b>   | 6697,11  | 6282,6   | 5826,37  | 9716,65  | 8123,27  | 12327,16 | 7130,6825 | 10225,215 | -3094,5325 |
| <b>TADA3</b>   | 6054,42  | 8985,04  | 8837,89  | 6189,31  | 9900,35  | 11321,5  | 7516,665  | 10610,925 | -3094,26   |
| <b>LARP7</b>   | 5443,41  | 4494,47  | 6151,64  | 4271,07  | 10211,23 | 6150,49  | 5090,1475 | 8180,86   | -3090,7125 |
| <b>E2F7</b>    | 123,22   | 1081,88  | 36,06    | 7,65     | 48,31    | 6748,16  | 312,2025  | 3398,235  | -3086,0325 |
| <b>MAD1L1</b>  | 1295,88  | 4046,59  | 3508,72  | 8118,72  | 11903,09 | 2741,12  | 4242,4775 | 7322,105  | -3079,6275 |
| <b>KDM5A</b>   | 1950,2   | 6451,39  | 4417,83  | 3317,78  | 7579,87  | 6646,61  | 4034,3    | 7113,24   | -3078,94   |
| <b>AAK1</b>    | 709,03   | 836,04   | 1562,63  | 2226,77  | 4600,51  | 4214,85  | 1333,6175 | 4407,68   | -3074,0625 |
| <b>ARID4A</b>  | 2056,19  | 2588,9   | 2366,67  | 2489,26  | 7709,47  | 3182,66  | 2375,255  | 5446,065  | -3070,81   |
| <b>TICRR</b>   | 4610,85  | 4447,47  | 1895,76  | 3474,09  | 2563,22  | 10788,57 | 3607,0425 | 6675,895  | -3068,8525 |
| <b>ERCC5</b>   | 7519,76  | 6278     | 14560,97 | 5367,13  | 7759,37  | 15221,35 | 8431,465  | 11490,36  | -3058,895  |
| <b>PIKFYVE</b> | 4265,74  | 4106,51  | 2922,02  | 4989,96  | 5813,4   | 8443,24  | 4071,0575 | 7128,32   | -3057,2625 |
| <b>PPP1CB</b>  | 9996,47  | 7980,06  | 5167,43  | 5933,29  | 11762,16 | 8858,88  | 7269,3125 | 10310,52  | -3041,2075 |
| <b>AZI2</b>    | 1658,4   | 2230,2   | 1389,38  | 1673,94  | 6435,19  | 3114,08  | 1737,98   | 4774,635  | -3036,655  |

|                 |          |          |         |          |          |          |            |           |            |
|-----------------|----------|----------|---------|----------|----------|----------|------------|-----------|------------|
| <b>TBC1D1</b>   | 3491,47  | 3362,83  | 2161,01 | 3090,72  | 5874,23  | 6241,18  | 3026,5075  | 6057,705  | -3031,1975 |
| <b>IAH1</b>     | 3        | 12,87    | 264,28  | 839,9    | 5602,32  | 1006,15  | 280,0125   | 3304,235  | -3024,2225 |
| <b>PALD1</b>    | 16,79    | 38,47    | 65,2    | 2,25     | 4846,38  | 1252,17  | 30,6775    | 3049,275  | -3018,5975 |
| <b>DOC2A</b>    | 81,58    | 40,23    | 117,08  | 97,46    | 638,21   | 5551,7   | 84,0875    | 3094,955  | -3010,8675 |
| <b>GSK3B</b>    | 2803,84  | 2839,18  | 1493,61 | 1914,14  | 3046,46  | 7495,33  | 2262,6925  | 5270,895  | -3008,2025 |
| <b>TCIRG1</b>   | 7093,79  | 2930,5   | 1184,94 | 8099,28  | 14965,98 | 684,91   | 4827,1275  | 7825,445  | -2998,3175 |
| <b>GID8</b>     | 6143,39  | 6242,98  | 6444,76 | 7426,18  | 6018,91  | 13094,91 | 6564,3275  | 9556,91   | -2992,5825 |
| <b>UBR5</b>     | 15178,77 | 11353,13 | 14160,2 | 12135,79 | 26234,7  | 6161,43  | 13206,9725 | 16198,065 | -2991,0925 |
| <b>MBTD1</b>    | 2885,85  | 4254,56  | 3597,37 | 3325,78  | 4060,25  | 8943,61  | 3515,89    | 6501,93   | -2986,04   |
| <b>CAMK1D</b>   | 1525,06  | 2079,25  | 225,75  | 1724,19  | 3487,77  | 5260,72  | 1388,5625  | 4374,245  | -2985,6825 |
| <b>LY75</b>     | 186,51   | 0        | 661,19  | 782,12   | 3116,5   | 3668,25  | 407,455    | 3392,375  | -2984,92   |
| <b>FAM102B</b>  | 1783,89  | 3426,21  | 1374,82 | 3580,96  | 4519,66  | 6531,84  | 2541,47    | 5525,75   | -2984,28   |
| <b>ZFP90</b>    | 495,6    | 932,02   | 1850,97 | 605,94   | 1140,29  | 6761,65  | 971,1325   | 3950,97   | -2979,8375 |
| <b>TOMM7</b>    | 2425,87  | 4935,6   | 7398,06 | 3683,15  | 13474,98 | 1705,89  | 4610,67    | 7590,435  | -2979,765  |
| <b>GNG10</b>    | 1157,08  | 943,69   | 861,38  | 1042,07  | 3886,14  | 4072,83  | 1001,055   | 3979,485  | -2978,43   |
| <b>TMEM65</b>   | 1646,78  | 6639,76  | 1113    | 1659,89  | 6726,22  | 4753,52  | 2764,8575  | 5739,87   | -2975,0125 |
| <b>VEZF1</b>    | 2780,51  | 2233,38  | 2219,19 | 2725,35  | 3955,26  | 6973,96  | 2489,6075  | 5464,61   | -2975,0025 |
| <b>BDP1</b>     | 4998,78  | 3136,93  | 2301,16 | 4741,89  | 6990,64  | 6547,97  | 3794,69    | 6769,305  | -2974,615  |
| <b>NTNG2</b>    | 0        | 28,27    | 22,06   | 6,49     | 64,22    | 5911,19  | 14,205     | 2987,705  | -2973,5    |
| <b>BOD1L1</b>   | 7943,7   | 6570,62  | 5104,04 | 6827,31  | 8965,19  | 10203,57 | 6611,4175  | 9584,38   | -2972,9625 |
| <b>MTREX</b>    | 10118,28 | 8685,61  | 5056,13 | 5939,92  | 8543,8   | 12292,85 | 7449,985   | 10418,325 | -2968,34   |
| <b>PLXNB2</b>   | 6639,35  | 23169,55 | 1259,5  | 6994,84  | 10428,53 | 14538,04 | 9515,81    | 12483,285 | -2967,475  |
| <b>PHF21A</b>   | 2323,36  | 2451,49  | 2755,49 | 3420,32  | 7937,11  | 3470,83  | 2737,665   | 5703,97   | -2966,305  |
| <b>PM20D2</b>   | 2950,6   | 385,47   | 290,19  | 36,01    | 3077,66  | 4685,37  | 915,5675   | 3881,515  | -2965,9475 |
| <b>SACM1L</b>   | 4202,13  | 4095,3   | 2505,28 | 2418,35  | 4790,95  | 7744,08  | 3305,265   | 6267,515  | -2962,25   |
| <b>ADGRE5</b>   | 1923,08  | 5399,32  | 2046,59 | 3225,97  | 11912,07 | 293,1    | 3148,74    | 6102,585  | -2953,845  |
| <b>POGZ</b>     | 4783,23  | 6097,37  | 3638,67 | 5253,08  | 6172,61  | 9612,68  | 4943,0875  | 7892,645  | -2949,5575 |
| <b>RYBP</b>     | 2894,02  | 5386,04  | 5042,49 | 5884,45  | 4488,66  | 11013,5  | 4801,75    | 7751,08   | -2949,33   |
| <b>PI4KA</b>    | 13610,84 | 14503,34 | 12426,7 | 8323,93  | 18772,71 | 11557,28 | 12216,2025 | 15164,995 | -2948,7925 |
| <b>FAM72A</b>   | 3384,44  | 1054,68  | 942,45  | 2730,12  | 6465,61  | 3485,06  | 2027,9225  | 4975,335  | -2947,4125 |
| <b>ARHGEF40</b> | 590,74   | 41,28    | 66,46   | 278,28   | 1962,36  | 4410,35  | 244,19     | 3186,355  | -2942,165  |
| <b>WDHD1</b>    | 5223     | 3626,27  | 1270,1  | 2630,7   | 2657,69  | 9601,24  | 3187,5175  | 6129,465  | -2941,9475 |
| <b>OTUD4</b>    | 2910,37  | 3825,67  | 2074,29 | 2702,96  | 5910,49  | 5729,06  | 2878,3225  | 5819,775  | -2941,4525 |



|          |          |          |          |          |           |          |            |           |            |
|----------|----------|----------|----------|----------|-----------|----------|------------|-----------|------------|
| AGPAT2   | 3407,57  | 2437,59  | 1673,41  | 2469,84  | 6899,12   | 3962,22  | 2497,1025  | 5430,67   | -2933,5675 |
| PSMA2    | 12016,88 | 8042,37  | 9868,38  | 8462,66  | 16739,2   | 8314,87  | 9597,5725  | 12527,035 | -2929,4625 |
| PAIP2    | 8083,68  | 7046,87  | 6400,86  | 6706,73  | 11101,64  | 8875,03  | 7059,535   | 9988,335  | -2928,8    |
| GNB4     | 4254,18  | 3097,9   | 3098,76  | 4031,57  | 4580,53   | 8513,46  | 3620,6025  | 6546,995  | -2926,3925 |
| CNST     | 3216,32  | 3453,84  | 1438,95  | 3830,49  | 7579,95   | 4239,4   | 2984,9     | 5909,675  | -2924,775  |
| CD38     | 1429,41  | 1192,83  | 6047,94  | 102,98   | 2556,72   | 7677,38  | 2193,29    | 5117,05   | -2923,76   |
| EIF2A    | 8067,27  | 8347,88  | 4180,18  | 5927,58  | 14234,08  | 4872,45  | 6630,7275  | 9553,265  | -2922,5375 |
| EIF3CL   | 571,25   | 298,38   | 1536,41  | 287,76   | 6466,74   | 721,81   | 673,45     | 3594,275  | -2920,825  |
| DOT1L    | 9680,83  | 12235,45 | 4316,82  | 4471,6   | 10227,61  | 10950,61 | 7676,175   | 10589,11  | -2912,935  |
| CEP350   | 5106,02  | 3668,79  | 2083,9   | 5118,56  | 6998,25   | 6814,17  | 3994,3175  | 6906,21   | -2911,8925 |
| DZANK1   | 153,95   | 111,17   | 171,26   | 60,01    | 5772,78   | 297,11   | 124,0975   | 3034,945  | -2910,8475 |
| BNIP2    | 4646,16  | 5146,71  | 6645,81  | 6786,11  | 10442,96  | 6986,5   | 5806,1975  | 8714,73   | -2908,5325 |
| ME2      | 5817,09  | 4920,03  | 2487,44  | 5798,25  | 10722,5   | 4593,28  | 4755,7025  | 7657,89   | -2902,1875 |
| DUSP7    | 3784,93  | 4318,63  | 2305,58  | 2380,82  | 9727,85   | 2451,73  | 3197,49    | 6089,79   | -2892,3    |
| B4GALT6  | 527,99   | 289,32   | 69,8     | 371,65   | 0         | 6406,12  | 314,69     | 3203,06   | -2888,37   |
| KIAA1143 | 3466,82  | 2911,78  | 2283,86  | 2135,91  | 3841,88   | 7332,14  | 2699,5925  | 5587,01   | -2887,4175 |
| HIRIP3   | 4088,66  | 3836,71  | 2371,65  | 3131,29  | 4117,11   | 8361,22  | 3357,0775  | 6239,165  | -2882,0875 |
| C2CD5    | 2459,44  | 3105,25  | 2521,07  | 1565,94  | 5933,6    | 4652,36  | 2412,925   | 5292,98   | -2880,055  |
| RPLP2    | 58136,23 | 54413,73 | 77512,34 | 48074,59 | 103896,68 | 20928,51 | 59534,2225 | 62412,595 | -2878,3725 |
| HNRNPU   | 85885,49 | 62685,14 | 51340,82 | 66268,78 | 83747,53  | 55087,33 | 66545,0575 | 69417,43  | -2872,3725 |
| PFKFB3   | 3033,74  | 1857,86  | 3941,7   | 2328,37  | 8608,41   | 2714,43  | 2790,4175  | 5661,42   | -2871,0025 |
| PLAUR    | 904,53   | 1427,76  | 1455,82  | 1380,49  | 7848,17   | 477,99   | 1292,15    | 4163,08   | -2870,93   |
| NDUFA5   | 4277     | 2935,78  | 3151,01  | 3703,24  | 5262,02   | 7507,45  | 3516,7575  | 6384,735  | -2867,9775 |
| MAD2L1   | 9698,83  | 5718,62  | 3228,24  | 5571,38  | 9163,13   | 8680,12  | 6054,2675  | 8921,625  | -2867,3575 |
| STRBP    | 3259,23  | 3382,7   | 1367,02  | 4174,17  | 999,26    | 10802,28 | 3045,78    | 5900,77   | -2854,99   |
| TBC1D14  | 4840,58  | 6027,24  | 2779,72  | 5645,89  | 8382,26   | 6972,72  | 4823,3575  | 7677,49   | -2854,1325 |
| RGS19    | 4333,93  | 1297,29  | 4699,82  | 5912,68  | 8087,79   | 5740,83  | 4060,93    | 6914,31   | -2853,38   |
| CEBPB    | 2583,76  | 1327,65  | 3213,2   | 3983,74  | 8198,65   | 3056,59  | 2777,0875  | 5627,62   | -2850,5325 |
| ERCC6L2  | 1005,56  | 1406,21  | 509,05   | 996,91   | 973,65    | 6681,52  | 979,4325   | 3827,585  | -2848,1525 |
| ANKHD1   | 8103,4   | 8004,69  | 7907,64  | 7858,96  | 12159,08  | 9459,65  | 7968,6725  | 10809,365 | -2840,6925 |
| DBNDD2   | 240,85   | 987,48   | 299,43   | 397,51   | 1194,05   | 5448,59  | 481,3175   | 3321,32   | -2840,0025 |
| HNMT     | 122,37   | 0        | 175,92   | 67,73    | 5860,34   | 2,28     | 91,505     | 2931,31   | -2839,805  |
| FOXK1    | 3731,87  | 5296,18  | 3626,17  | 4833,34  | 7276,5    | 7141,53  | 4371,89    | 7209,015  | -2837,125  |

|                 |         |          |          |         |          |          |           |           |            |
|-----------------|---------|----------|----------|---------|----------|----------|-----------|-----------|------------|
| <b>POLE3</b>    | 9887,81 | 9099,65  | 6136,38  | 7984,99 | 8164,31  | 14063,58 | 8277,2075 | 11113,945 | -2836,7375 |
| <b>ARHGAP17</b> | 3173,26 | 2385,31  | 3714,9   | 2846,6  | 8793,8   | 2938,77  | 3030,0175 | 5866,285  | -2836,2675 |
| <b>UBE2K</b>    | 6266,45 | 6680,57  | 3388,36  | 7274,38 | 8504,12  | 8969,93  | 5902,44   | 8737,025  | -2834,585  |
| <b>VAPB</b>     | 2203,83 | 3300,99  | 3288,43  | 2682,37 | 3188,85  | 8202,95  | 2868,905  | 5695,9    | -2826,995  |
| <b>CNOT8</b>    | 7542,53 | 6401,88  | 4847,61  | 7379,58 | 10785,17 | 7952,43  | 6542,9    | 9368,8    | -2825,9    |
| <b>TMEM167A</b> | 6938,05 | 5229,89  | 5896,53  | 7347,4  | 12599,69 | 5755,78  | 6352,9675 | 9177,735  | -2824,7675 |
| <b>ATP5PD</b>   | 6682,5  | 5299,78  | 9295,66  | 6190,57 | 14007,65 | 5363,89  | 6867,1275 | 9685,77   | -2818,6425 |
| <b>AURKA</b>    | 5384,68 | 4035,97  | 3714,58  | 5101,97 | 4468,36  | 10274,91 | 4559,3    | 7371,635  | -2812,335  |
| <b>DES12</b>    | 3656,63 | 2159,92  | 945,85   | 1991,49 | 3916,62  | 6080,31  | 2188,4725 | 4998,465  | -2809,9925 |
| <b>CUL4B</b>    | 4138,46 | 2915,97  | 4068,37  | 3456,86 | 6660,8   | 6242,39  | 3644,915  | 6451,595  | -2806,68   |
| <b>RASGRP2</b>  | 6093,26 | 4899,79  | 21863,29 | 8599,82 | 15606,41 | 10734,75 | 10364,04  | 13170,58  | -2806,54   |
| <b>GBA</b>      | 2412,52 | 3418,92  | 3132,3   | 2923,79 | 4998,08  | 6558,62  | 2971,8825 | 5778,35   | -2806,4675 |
| <b>NAIP</b>     | 2657,62 | 1089,41  | 1810,83  | 1654,3  | 6654,57  | 2561     | 1803,04   | 4607,785  | -2804,745  |
| <b>SLC37A2</b>  | 58,4    | 20,08    | 25,36    | 76,57   | 5359,02  | 323,99   | 45,1025   | 2841,505  | -2796,4025 |
| <b>FANCD2</b>   | 6187,79 | 5053,85  | 3111,42  | 2564,7  | 4971,26  | 9077,71  | 4229,44   | 7024,485  | -2795,045  |
| <b>PSMB10</b>   | 2886,02 | 4315,53  | 4966,78  | 3617,61 | 11888,56 | 1592,32  | 3946,485  | 6740,44   | -2793,955  |
| <b>TMEM87A</b>  | 3028,98 | 2534,26  | 3174,32  | 2432,56 | 8071,57  | 3098,44  | 2792,53   | 5585,005  | -2792,475  |
| <b>DEF6</b>     | 2984,74 | 4716,85  | 7245,18  | 4955,58 | 5726,25  | 9807,96  | 4975,5875 | 7767,105  | -2791,5175 |
| <b>BRAF</b>     | 1617,37 | 1909,08  | 1251,28  | 1644,07 | 5615,91  | 3176,17  | 1605,45   | 4396,04   | -2790,59   |
| <b>AKR7A2</b>   | 2965,12 | 5754,5   | 3930,8   | 2354,21 | 7224,12  | 5858,04  | 3751,1575 | 6541,08   | -2789,9225 |
| <b>NUP50</b>    | 8238,2  | 9049,74  | 4175,29  | 8479,86 | 8070,05  | 12480,12 | 7485,7725 | 10275,085 | -2789,3125 |
| <b>RNF40</b>    | 9532,75 | 10544,94 | 11068,7  | 8817,54 | 15387,86 | 10167,37 | 9990,9825 | 12777,615 | -2786,6325 |
| <b>ZNF618</b>   | 32,46   | 1183,35  | 894,17   | 2379,81 | 2231,14  | 5581,07  | 1122,4475 | 3906,105  | -2783,6575 |
| <b>XRN1</b>     | 1694,6  | 2085,06  | 1170,05  | 1412,25 | 4296,6   | 4446,02  | 1590,49   | 4371,31   | -2780,82   |
| <b>PRIM1</b>    | 3725,87 | 3372,8   | 1086,57  | 2460,98 | 3149,99  | 7733,5   | 2661,555  | 5441,745  | -2780,19   |
| <b>STAG1</b>    | 4603,13 | 3037,39  | 1014,82  | 1627,85 | 1632,38  | 9068,63  | 2570,7975 | 5350,505  | -2779,7075 |
| <b>UBR7</b>     | 4775,38 | 5053,89  | 1992,61  | 4749,43 | 3584,37  | 10253    | 4142,8275 | 6918,685  | -2775,8575 |
| <b>CLK2</b>     | 5618,19 | 3862,83  | 4671,68  | 5111,45 | 10615,36 | 4565,9   | 4816,0375 | 7590,63   | -2774,5925 |
| <b>NXT2</b>     | 1072,87 | 1246,02  | 806,93   | 1649,3  | 4584,85  | 3344,27  | 1193,78   | 3964,56   | -2770,78   |
| <b>DLGAP5</b>   | 3605,93 | 5109,84  | 2550,48  | 3674,67 | 3210,78  | 9800,35  | 3735,23   | 6505,565  | -2770,335  |
| <b>MIS18BP1</b> | 4038,78 | 4913,34  | 2382,12  | 4156,16 | 7009,86  | 6274,24  | 3872,6    | 6642,05   | -2769,45   |
| <b>AKT3</b>     | 80,08   | 20,46    | 20,9     | 13,78   | 5559,49  | 29,63    | 33,805    | 2794,56   | -2760,755  |
| <b>SEPTIN5</b>  | 181,11  | 1634,78  | 0        | 81,17   | 4121,13  | 2343,72  | 474,265   | 3232,425  | -2758,16   |

|                |          |          |          |          |          |          |            |           |            |
|----------------|----------|----------|----------|----------|----------|----------|------------|-----------|------------|
| <b>CNOT1</b>   | 21457,76 | 24938,4  | 10370,17 | 16901,25 | 10472,02 | 31871,42 | 18416,895  | 21171,72  | -2754,825  |
| <b>LMBR1</b>   | 2082,78  | 3142,87  | 1602,03  | 2009,61  | 3131,12  | 6789,04  | 2209,3225  | 4960,08   | -2750,7575 |
| <b>TLE4</b>    | 89,94    | 989,17   | 5,14     | 248,03   | 3123,36  | 3040,11  | 333,07     | 3081,735  | -2748,665  |
| <b>NFATC2</b>  | 717,51   | 3413,93  | 591,09   | 2762,16  | 0        | 9237,94  | 1871,1725  | 4618,97   | -2747,7975 |
| <b>PDCD6IP</b> | 5745,85  | 13507,7  | 8602,16  | 7479,65  | 12644,87 | 10513,37 | 8833,84    | 11579,12  | -2745,28   |
| <b>FAM120A</b> | 5116,16  | 17317,68 | 4448,48  | 16881,91 | 12745,83 | 14622,16 | 10941,0575 | 13683,995 | -2742,9375 |
| <b>GBE1</b>    | 4323,69  | 10600,55 | 5118,67  | 2476,17  | 9581,81  | 7158,7   | 5629,77    | 8370,255  | -2740,485  |
| <b>LHX2</b>    | 0        | 0        | 1,18     | 0        | 5481,15  | 0        | 0,295      | 2740,575  | -2740,28   |
| <b>LSM14B</b>  | 4273,71  | 5888,15  | 5298,16  | 5397,88  | 5236,76  | 10671,48 | 5214,475   | 7954,12   | -2739,645  |
| <b>FEV</b>     | 22,1     | 16,6     | 226,82   | 5360,04  | 0        | 8291,58  | 1406,39    | 4145,79   | -2739,4    |
| <b>RAB1A</b>   | 7127,25  | 5150,69  | 6050,78  | 4944,58  | 11628,31 | 5481,43  | 5818,325   | 8554,87   | -2736,545  |
