# Supplementary material for: The Hematopoietic TALE-Code Shows Normal Activity of IRX1 in Myeloid Progenitors and Reveals Ectopic Expression of IRX3 and IRX5 in Acute Myeloid Leukemia
Source: MDPI journal article supplement (doi:10.3390/ijms23063192), 2022-03-16
Supplement: s1 [file s1]

| gene       | CMK      | M-07e    | MKPL-1    | UT-7     | OCI-AML3  | MEGAL    | IRX1       | IRX35      | IRX1-IRX35 |
|------------|----------|----------|-----------|----------|-----------|----------|------------|------------|------------|
| EEF1A1     | 1242567  | 1249235  | 1354612,5 | 1298236  | 1288572,7 | 566886,8 | 1286162,78 | 927729,75  | 358433,025 |
| HBG2       | 118671,9 | 65203,95 | 86844,53  | 407387,5 | 0         | 15,79    | 169526,975 | 7,895      | 169519,08  |
| AC104389.6 | 72407,63 | 29972,95 | 377741,35 | 87502,85 | 0         | 0        | 141906,195 | 0          | 141906,195 |
| HBG1       | 69851,76 | 24291,81 | 1253,87   | 374225   | 0         | 12,23    | 117405,608 | 6,115      | 117399,493 |
| GLUL       | 157283,8 | 71999,53 | 81074,42  | 219373,6 | 25248,95  | 11287,73 | 132432,82  | 18268,34   | 114164,48  |
| TFRC       | 108932,9 | 130618,7 | 128238,09 | 219380   | 6135,98   | 95318,19 | 146792,39  | 50727,085  | 96065,305  |
| RPL13A     | 232972,1 | 391593   | 429906,39 | 227075,2 | 373496,32 | 81163,6  | 320386,663 | 227329,96  | 93056,7025 |
| HSP90AB1   | 205847,2 | 147852,2 | 184058,83 | 279946,2 | 163180,86 | 86911,45 | 204426,09  | 125046,155 | 79379,935  |
| ITGA2B     | 79497,21 | 42930,7  | 196079,73 | 65428,02 | 146,89    | 33203,03 | 95983,915  | 16674,96   | 79308,955  |
| MT-CO2     | 196349,8 | 273481,8 | 274326,73 | 205766,7 | 218407,94 | 111935   | 237481,268 | 165171,47  | 72309,7975 |
| APOE       | 16218,59 | 32464,04 | 182151,04 | 49259,19 | 63,62     | 167,38   | 70023,215  | 115,5      | 69907,715  |
| HSPA8      | 219859   | 132433,5 | 99208,35  | 203825,3 | 156784,79 | 38700,84 | 163831,535 | 97742,815  | 66088,72   |
| PRKCSH     | 16022,72 | 30297,46 | 95515,63  | 199618,6 | 25604,1   | 13145,74 | 85363,59   | 19374,92   | 65988,67   |
| MT-CO3     | 271710,3 | 347480,3 | 431733,99 | 244012,8 | 276963,81 | 238629,5 | 323734,328 | 257796,67  | 65937,6575 |
| FTH1       | 89488,45 | 83027,51 | 137803,75 | 136921,4 | 57066,16  | 40896,52 | 111810,265 | 48981,34   | 62828,925  |
| CALR       | 111091,9 | 54179,64 | 144562,86 | 111848,8 | 38256,67  | 47246,64 | 105420,798 | 42751,655  | 62669,1425 |
| RPL10      | 140681,3 | 136161,3 | 180251,07 | 185920,7 | 146644,57 | 51525,96 | 160753,58  | 99085,265  | 61668,315  |
| RPLP0      | 264458,2 | 227220,4 | 295495,68 | 197442,7 | 280271,59 | 90236,9  | 246154,248 | 185254,245 | 60900,0025 |
| TUBB       | 174797   | 148273,4 | 136476,62 | 155884,2 | 116576,75 | 70675,76 | 153857,81  | 93626,255  | 60231,555  |
| PIM1       | 35678,52 | 38502,64 | 96378,52  | 78794,68 | 377,59    | 6132,4   | 62338,59   | 3254,995   | 59083,595  |
| HNRNPA1    | 220575,9 | 236493,8 | 201587,34 | 182616,7 | 200623,89 | 102000,8 | 210318,43  | 151312,355 | 59006,075  |
| ENO1       | 230771,4 | 240135,4 | 307260,94 | 183592,4 | 280222    | 83868,13 | 240440,023 | 182045,065 | 58394,9575 |
| HSPG2      | 14033,29 | 84077,84 | 73989,57  | 59334,01 | 284,88    | 3752,76  | 57858,6775 | 2018,82    | 55839,8575 |
| RPL4       | 202597,9 | 215386,6 | 222625,35 | 181304,8 | 202598,45 | 96851,86 | 205478,633 | 149725,155 | 55753,4775 |
| TRIM28     | 74198,71 | 106776   | 117944,76 | 64396,93 | 38188,46  | 32513,63 | 90829,0975 | 35351,045  | 55478,0525 |
| RPS3       | 238253,3 | 213625   | 187608,96 | 226281,8 | 252866,21 | 69798,08 | 216442,24  | 161332,145 | 55110,095  |
| HDC        | 75619,23 | 136,35   | 127333,81 | 21647,76 | 3,46      | 2279,45  | 56184,2875 | 1141,455   | 55042,8325 |
| ILF3       | 45417,19 | 50150,8  | 137178,27 | 96771,67 | 24359,43  | 31307,82 | 82379,4825 | 27833,625  | 54545,8575 |
| FLNA       | 90548,87 | 95819,78 | 141844,61 | 205478,3 | 88759,27  | 73258,41 | 133422,9   | 81008,84   | 52414,06   |
| PRG2       | 43747,52 | 212,22   | 48462     | 114295,5 | 97,98     | 36,91    | 51679,305  | 67,445     | 51611,86   |
| RPS5       | 89819,5  | 132589,8 | 132361,05 | 97871,24 | 97958,37  | 31806,96 | 113160,395 | 64882,665  | 48277,73   |
| RPS2       | 225886,3 | 269593,2 | 215286,96 | 195857   | 319802,6  | 39526,63 | 226655,875 | 179664,615 | 46991,26   |

|                 |          |          |           |          |           |          |            |            |            |
|-----------------|----------|----------|-----------|----------|-----------|----------|------------|------------|------------|
| <b>SMARCA4</b>  | 24918,64 | 27448,5  | 126775,18 | 83664,47 | 20899,15  | 19516,21 | 65701,6975 | 20207,68   | 45494,0175 |
| <b>PFN1</b>     | 63394,24 | 115831,8 | 181891,06 | 109634,3 | 118553,9  | 27226,25 | 117687,845 | 72890,075  | 44797,77   |
| <b>RPL18A</b>   | 111494,2 | 110070,4 | 97323,12  | 153943,7 | 113978,15 | 37365,6  | 118207,843 | 75671,875  | 42535,9675 |
| <b>TMSB10</b>   | 31958,01 | 43037,02 | 123776,57 | 49401,69 | 26653,75  | 13662,01 | 62043,3225 | 20157,88   | 41885,4425 |
| <b>RPS9</b>     | 69282,42 | 127262,8 | 113419,84 | 81486,81 | 91530,72  | 23212,64 | 97862,9725 | 57371,68   | 40491,2925 |
| <b>TPM4</b>     | 16179,8  | 42734,7  | 122527,82 | 66341,37 | 14789,22  | 29080,31 | 61945,9225 | 21934,765  | 40011,1575 |
| <b>DNM2</b>     | 12523,11 | 16826,02 | 73580,5   | 90545,69 | 8957,36   | 10333,42 | 48368,83   | 9645,39    | 38723,44   |
| <b>RPS11</b>    | 104901   | 118616,6 | 224011,58 | 109880,2 | 156021,06 | 47210,49 | 139352,345 | 101615,775 | 37736,57   |
| <b>MT-ND4</b>   | 309245   | 322753,5 | 331251,5  | 242542   | 269242,12 | 258649,4 | 301448,008 | 263945,75  | 37502,2575 |
| <b>TUBA1B</b>   | 201715,7 | 139181,5 | 151785,8  | 163833,4 | 95578,15  | 157987,6 | 164129,09  | 126782,88  | 37346,21   |
| <b>RHAG</b>     | 25752,99 | 60821,85 | 40327,08  | 25716,4  | 0         | 2437,04  | 38154,58   | 1218,52    | 36936,06   |
| <b>RPS19</b>    | 68767,31 | 84424,05 | 164305,56 | 73846,17 | 96710,73  | 25278,85 | 97835,7725 | 60994,79   | 36840,9825 |
| <b>HMGA1</b>    | 91697,09 | 56749,39 | 48432,71  | 30421,53 | 26888,02  | 13251,8  | 56825,18   | 20069,91   | 36755,27   |
| <b>LAPTM5</b>   | 31841,33 | 77935,39 | 63685,44  | 82007,56 | 30799,15  | 24285,79 | 63867,43   | 27542,47   | 36324,96   |
| <b>HSPA5</b>    | 76541,85 | 55442,15 | 47854,57  | 48267,7  | 24442,77  | 18276,53 | 57026,5675 | 21359,65   | 35666,9175 |
| <b>MT-CO1</b>   | 574923,3 | 690272,3 | 656997,68 | 536111,7 | 621536,7  | 536703,4 | 614576,245 | 579120,07  | 35456,175  |
| <b>GATA1</b>    | 101163,4 | 6953,14  | 19903,01  | 18229,44 | 0         | 2900,42  | 36562,255  | 1450,21    | 35112,045  |
| <b>CSF2RB</b>   | 51280,5  | 16705,99 | 27236,16  | 47957,61 | 2009,29   | 524,33   | 35795,065  | 1266,81    | 34528,255  |
| <b>RPL3</b>     | 179979,1 | 249469,5 | 202614,67 | 170118,9 | 253299,09 | 79551,79 | 200545,513 | 166425,44  | 34120,0725 |
| <b>KCNH2</b>    | 28376,84 | 37177,36 | 36199,08  | 33722,64 | 6,68      | 22,97    | 33868,98   | 14,825     | 33854,155  |
| <b>RPL6</b>     | 121032,6 | 117322,1 | 135696,07 | 103902,9 | 125329,32 | 46628,69 | 119488,415 | 85979,005  | 33509,41   |
| <b>PSAP</b>     | 48981,65 | 33175,69 | 119928,85 | 33502,97 | 18899,99  | 31962,4  | 58897,29   | 25431,195  | 33466,095  |
| <b>IGFBP4</b>   | 527,71   | 42607,8  | 65130,87  | 98064,03 | 4509,44   | 32060,07 | 51582,6025 | 18284,755  | 33297,8475 |
| <b>RPL18</b>    | 70665,38 | 80509,89 | 143438,1  | 96674,96 | 99281,49  | 31121,94 | 97822,0825 | 65201,715  | 32620,3675 |
| <b>GATA2</b>    | 63632,83 | 33068,4  | 55733,55  | 20722,73 | 1433,09   | 20790,99 | 43289,3775 | 11112,04   | 32177,3375 |
| <b>SH3BGRL3</b> | 30363,91 | 23767,57 | 71523,55  | 35170,4  | 9617,2    | 8069,22  | 40206,3575 | 8843,21    | 31363,1475 |
| <b>CFL1</b>     | 103384,8 | 56518,38 | 92429,34  | 62656,08 | 51111,13  | 43728,68 | 78747,155  | 47419,905  | 31327,25   |
| <b>SLC40A1</b>  | 35655,71 | 35119,13 | 25376,15  | 52388,93 | 339,33    | 11505,07 | 37134,98   | 5922,2     | 31212,78   |
| <b>TLN1</b>     | 70856,72 | 80775,51 | 62953,53  | 55941,1  | 23342,13  | 49922,49 | 67631,715  | 36632,31   | 30999,405  |
| <b>APOC1</b>    | 7765,03  | 11647,45 | 80613,42  | 25088,82 | 317,68    | 483,77   | 31278,68   | 400,725    | 30877,955  |
| <b>ACTN4</b>    | 28897,3  | 41985,62 | 64216,62  | 71852,89 | 13847,55  | 28363,82 | 51738,1075 | 21105,685  | 30632,4225 |
| <b>YBX1</b>     | 80924,34 | 77228,36 | 95990,03  | 103672,7 | 77425,07  | 40820,37 | 89453,8525 | 59122,72   | 30331,1325 |
| <b>RPL11</b>    | 64583,21 | 73066,58 | 146090,59 | 68365,5  | 84821,49  | 34248,16 | 88026,47   | 59534,825  | 28491,645  |

|         |          |          |           |          |           |          |            |            |            |
|---------|----------|----------|-----------|----------|-----------|----------|------------|------------|------------|
| EIF5A   | 31230,49 | 59159,48 | 69393,95  | 42494,61 | 30237,7   | 13950,01 | 50569,6325 | 22093,855  | 28475,7775 |
| DIAPH1  | 49917,71 | 79340,42 | 27498,02  | 36223,76 | 22028,24  | 17938,78 | 48244,9775 | 19983,51   | 28261,4675 |
| DLK1    | 111781,6 | 1099,41  | 84,6      | 0        | 0         | 1,93     | 28241,4075 | 0,965      | 28240,4425 |
| SPINT2  | 10676,72 | 17633,86 | 82664     | 17612,22 | 0,94      | 8004,67  | 32146,7    | 4002,805   | 28143,895  |
| RPL28   | 60377,75 | 91813,3  | 136304,15 | 77546,92 | 102727,03 | 24236,93 | 91510,53   | 63481,98   | 28028,55   |
| ESYT1   | 24283,94 | 40920,96 | 33381,6   | 48775,64 | 7139,83   | 11934,94 | 36840,535  | 9537,385   | 27303,15   |
| GPI     | 53332,94 | 50232,55 | 87114,11  | 52834,97 | 50020,09  | 17169,08 | 60878,6425 | 33594,585  | 27284,0575 |
| SMARCA2 | 15128,05 | 13107,48 | 14400,58  | 99257,68 | 5234,53   | 11224,21 | 35473,4475 | 8229,37    | 27244,0775 |
| EGFL7   | 19646,3  | 18007,89 | 45900,3   | 29773,1  | 721,43    | 1471,4   | 28331,8975 | 1096,415   | 27235,4825 |
| VASP    | 27756,28 | 20084,87 | 46970,67  | 40111,45 | 8629,39   | 4559,84  | 33730,8175 | 6594,615   | 27136,2025 |
| CDC37   | 11930,71 | 16514,68 | 64299,37  | 60456,04 | 15060,99  | 7738,37  | 38300,2    | 11399,68   | 26900,52   |
| PDIA3   | 62986,66 | 35271,34 | 70396,56  | 38699,06 | 27372,2   | 22531,15 | 51838,405  | 24951,675  | 26886,73   |
| MYC     | 27139,61 | 63974,61 | 27919,01  | 45278,91 | 27626,4   | 1087,96  | 41078,035  | 14357,18   | 26720,855  |
| MLC1    | 12339,83 | 60981,61 | 24513,36  | 21445,69 | 619,46    | 7099,26  | 29820,1225 | 3859,36    | 25960,7625 |
| SLC25A6 | 77768,26 | 75522,99 | 21514,38  | 51724,41 | 38647,31  | 23454,8  | 56632,51   | 31051,055  | 25581,455  |
| RPSA    | 134167,1 | 124696,9 | 105810,75 | 77459,93 | 118156,16 | 53319,35 | 110533,683 | 85737,755  | 24795,9275 |
| PFKL    | 22593,52 | 24221,69 | 66378,97  | 52030,42 | 23811,05  | 9255,39  | 41306,15   | 16533,22   | 24772,93   |
| S100A6  | 11391,78 | 11298,45 | 59139,55  | 44283,7  | 8896,07   | 4845,68  | 31528,37   | 6870,875   | 24657,495  |
| PIEZO1  | 48426,4  | 51309,47 | 113502,12 | 45935,39 | 37200,42  | 43146,41 | 64793,345  | 40173,415  | 24619,93   |
| CD24    | 81429,26 | 52,19    | 8647,31   | 8079,51  | 0         | 2,48     | 24552,0675 | 1,24       | 24550,8275 |
| MT-ND1  | 217787,2 | 177887,9 | 146483,85 | 86701,39 | 146088,88 | 120189,9 | 157215,088 | 133139,38  | 24075,7075 |
| TAL1    | 17601,46 | 16839,76 | 18559     | 43253,53 | 291,04    | 13,17    | 24063,4375 | 152,105    | 23911,3325 |
| LDB1    | 29899,9  | 36067,6  | 32371,6   | 33323,87 | 4038,19   | 14131,6  | 32915,7425 | 9084,895   | 23830,8475 |
| EIF3G   | 14605,21 | 12640,99 | 64271,84  | 48012,43 | 15024,2   | 7240,69  | 34882,6175 | 11132,445  | 23750,1725 |
| SOD1    | 32395,81 | 11517,77 | 81012,13  | 22734,79 | 14458,51  | 12336,48 | 36915,125  | 13397,495  | 23517,63   |
| TCP1    | 41178,1  | 38173,97 | 22780,34  | 68619,74 | 18714,34  | 19897,72 | 42688,0375 | 19306,03   | 23382,0075 |
| MT-ATP6 | 181610,1 | 226052,2 | 236851,05 | 172388,8 | 149322,81 | 212443,2 | 204225,563 | 180883,005 | 23342,5575 |
| HDAC7   | 17722,94 | 11798,04 | 38145,86  | 35790,6  | 2116,82   | 3362,34  | 25864,36   | 2739,58    | 23124,78   |
| RPS28   | 33264,47 | 30241,78 | 74989,03  | 61428,3  | 46567,74  | 7384,56  | 49980,895  | 26976,15   | 23004,745  |
| HBA1    | 15110,78 | 585,83   | 57665,27  | 18054,93 | 0         | 9,09     | 22854,2025 | 4,545      | 22849,6575 |
| TGM2    | 4636,96  | 26690,15 | 30891,66  | 29275,3  | 108,64    | 5,04     | 22873,5175 | 56,84      | 22816,6775 |
| NFE2    | 26432,44 | 3563,05  | 53254,46  | 23351,5  | 891,38    | 6889,94  | 26650,3625 | 3890,66    | 22759,7025 |
| ANK1    | 17452,57 | 23981,99 | 21559,17  | 25796,18 | 0         | 3,14     | 22197,4775 | 1,57       | 22195,9075 |

|                 |          |          |           |          |           |          |            |           |            |
|-----------------|----------|----------|-----------|----------|-----------|----------|------------|-----------|------------|
| <b>RPS16</b>    | 74829,22 | 77032,25 | 139331,86 | 82632,12 | 105424,89 | 37442,62 | 93456,3625 | 71433,755 | 22022,6075 |
| <b>SLC1A5</b>   | 25063,43 | 26556,94 | 47302,28  | 53879,71 | 12854,82  | 20642,78 | 38200,59   | 16748,8   | 21451,79   |
| <b>DDOST</b>    | 28348,82 | 25285,84 | 60037     | 34476,27 | 19249,23  | 11943,28 | 37036,9825 | 15596,255 | 21440,7275 |
| <b>DNMT1</b>    | 26004,39 | 22155,69 | 57057,46  | 70389,59 | 16978,9   | 28181,48 | 43901,7825 | 22580,19  | 21321,5925 |
| <b>S100A4</b>   | 24759,48 | 21659,79 | 46488,94  | 25544,68 | 11940,52  | 5255,21  | 29613,2225 | 8597,865  | 21015,3575 |
| <b>HK1</b>      | 27131,58 | 20561,97 | 23267,8   | 39053,39 | 4807,81   | 8728,83  | 27503,685  | 6768,32   | 20735,365  |
| <b>UBB</b>      | 70037,14 | 59941,82 | 100448,08 | 56486,82 | 50918,1   | 51850,9  | 71728,465  | 51384,5   | 20343,965  |
| <b>HNRNPAB</b>  | 40326,65 | 36247,18 | 26154,28  | 44039,88 | 14188,79  | 18673,19 | 36691,9975 | 16430,99  | 20261,0075 |
| <b>LY6E</b>     | 25349,17 | 29714,25 | 36615,82  | 10507,59 | 10703,22  | 13,01    | 25546,7075 | 5358,115  | 20188,5925 |
| <b>RPS10</b>    | 70102,34 | 66168,7  | 115889,15 | 63320,02 | 103114,23 | 14362,82 | 78870,0525 | 58738,525 | 20131,5275 |
| <b>KHSRP</b>    | 28776,93 | 41122,25 | 24754,03  | 69737,96 | 13824,1   | 28140,85 | 41097,7925 | 20982,475 | 20115,3175 |
| <b>PTMA</b>     | 159778,7 | 191655,3 | 192607,52 | 148762,9 | 210705,89 | 95591,19 | 173201,1   | 153148,54 | 20052,56   |
| <b>CHD4</b>     | 70303,72 | 54583,37 | 69747,51  | 38530,54 | 37943,01  | 38762,6  | 58291,285  | 38352,805 | 19938,48   |
| <b>RAVER1</b>   | 13113,41 | 14835,34 | 37401,75  | 43433,56 | 3504,81   | 11058,87 | 27196,015  | 7281,84   | 19914,175  |
| <b>HSPD1</b>    | 92252,04 | 64603,26 | 38484,94  | 64338,53 | 73071,71  | 17450,24 | 64919,6925 | 45260,975 | 19658,7175 |
| <b>EIF4G2</b>   | 74632,19 | 54096,12 | 44531,27  | 54405,57 | 42680,39  | 32178,27 | 56916,2875 | 37429,33  | 19486,9575 |
| <b>MYH9</b>     | 34719,76 | 117123,8 | 41181,62  | 56161,48 | 50382,51  | 35251,41 | 62296,6625 | 42816,96  | 19479,7025 |
| <b>CD34</b>     | 88076,85 | 102,17   | 46247,45  | 382,74   | 5,65      | 28528,62 | 33702,3025 | 14267,135 | 19435,1675 |
| <b>U2AF1</b>    | 4324,58  | 9663,03  | 57919,47  | 24309,48 | 5764,03   | 3514,54  | 24054,14   | 4639,285  | 19414,855  |
| <b>TXNDC5</b>   | 25346,77 | 16493,71 | 40487,01  | 29580,33 | 8782,7    | 8391,57  | 27976,955  | 8587,135  | 19389,82   |
| <b>MRPL4</b>    | 11299,83 | 9864,98  | 44077,8   | 31630,06 | 7168,17   | 2499,27  | 24218,1675 | 4833,72   | 19384,4475 |
| <b>NIBAN2</b>   | 11411,93 | 14124,21 | 33139,05  | 36489,89 | 6703,64   | 2474,52  | 23791,27   | 4589,08   | 19202,19   |
| <b>PICALM</b>   | 28893,2  | 12815,76 | 37875,69  | 30943,05 | 5759,29   | 11351,87 | 27631,925  | 8555,58   | 19076,345  |
| <b>KIT</b>      | 5009,37  | 32695,92 | 28962,3   | 20758,49 | 1,27      | 5617,95  | 21856,52   | 2809,61   | 19046,91   |
| <b>LENG8</b>    | 16120,72 | 34851,35 | 53727,52  | 22615,44 | 13241,67  | 12978,68 | 31828,7575 | 13110,175 | 18718,5825 |
| <b>FERMT3</b>   | 30472,24 | 15852,5  | 52501,23  | 23922,05 | 12778,44  | 11866,29 | 30687,005  | 12322,365 | 18364,64   |
| <b>ABCC4</b>    | 41496,34 | 14363,88 | 33825,37  | 21393,26 | 1400,91   | 17500,34 | 27769,7125 | 9450,625  | 18319,0875 |
| <b>PGD</b>      | 23046,45 | 16873,93 | 32810,33  | 30545,47 | 3986,7    | 11583,39 | 25819,045  | 7785,045  | 18034      |
| <b>NUCB1</b>    | 12541,44 | 17816,12 | 51246,9   | 20000,61 | 6940,07   | 7909,61  | 25401,2675 | 7424,84   | 17976,4275 |
| <b>SERPINB1</b> | 7503,78  | 15765,86 | 72090,81  | 7378,91  | 9084,82   | 6346,48  | 25684,84   | 7715,65   | 17969,19   |
| <b>UBL5</b>     | 7398,98  | 6068,51  | 51056,77  | 27077,6  | 6266,32   | 3617,31  | 22900,465  | 4941,815  | 17958,65   |
| <b>RPS6</b>     | 86865,52 | 155529   | 147766,62 | 479062,4 | 325583,79 | 73128,39 | 217305,89  | 199356,09 | 17949,8    |
| <b>PPIB</b>     | 32460,54 | 26362    | 66897,21  | 28583,23 | 30922,41  | 10405,01 | 38575,745  | 20663,71  | 17912,035  |

|         |          |          |           |          |           |          |            |            |            |
|---------|----------|----------|-----------|----------|-----------|----------|------------|------------|------------|
| LYL1    | 21596,41 | 14406,24 | 35240,74  | 37633,92 | 9758,19   | 8988,28  | 27219,3275 | 9373,235   | 17846,0925 |
| KLF1    | 11866,03 | 14885,54 | 24172,92  | 25152,67 | 33,42     | 2357,54  | 19019,29   | 1195,48    | 17823,81   |
| UROD    | 18522,56 | 17173,34 | 32608,12  | 21598,84 | 2444,49   | 6869,94  | 22475,715  | 4657,215   | 17818,5    |
| TGFB1   | 29688,98 | 19364,54 | 60026,57  | 29992,91 | 21293,16  | 12639,65 | 34768,25   | 16966,405  | 17801,845  |
| IFITM3  | 1750,98  | 41,26    | 66262,88  | 2553,58  | 367,53    | 210,59   | 17652,175  | 289,06     | 17363,115  |
| MYL4    | 18697,35 | 7628,08  | 35224,23  | 8272,16  | 0         | 763,04   | 17455,455  | 381,52     | 17073,935  |
| HLA-A   | 18497,63 | 34308,9  | 155983,18 | 5123,77  | 65173,22  | 7748,29  | 53478,37   | 36460,755  | 17017,615  |
| SLC43A3 | 44737,31 | 13937,08 | 18302,88  | 34843,79 | 16999,54  | 4898,1   | 27955,265  | 10948,82   | 17006,445  |
| HERC2   | 29043    | 30974,56 | 40670,2   | 42858,1  | 6849,58   | 31230,82 | 35886,465  | 19040,2    | 16846,265  |
| RPS18   | 132317,1 | 126115,7 | 225480,91 | 124296,7 | 246658,6  | 24834,22 | 152052,6   | 135746,41  | 16306,19   |
| MPP1    | 17770,44 | 8996,38  | 21805,83  | 30134,35 | 2431,13   | 4310,25  | 19676,75   | 3370,69    | 16306,06   |
| FAU     | 31884,18 | 32368,37 | 56408,71  | 34945,07 | 32828,18  | 12495,43 | 38901,5825 | 22661,805  | 16239,7775 |
| RPL36   | 31005,67 | 38576    | 63360,66  | 81051,32 | 65877,16  | 8664,27  | 53498,4125 | 37270,715  | 16227,6975 |
| PRRC2A  | 31118,54 | 45819,34 | 37388,48  | 48025,52 | 27411,76  | 21464,41 | 40587,97   | 24438,085  | 16149,885  |
| BLVRB   | 11743,69 | 7836,67  | 27828,88  | 24668,88 | 1978,28   | 1972,77  | 18019,53   | 1975,525   | 16044,005  |
| HNRNPM  | 37599,92 | 38272,57 | 34386,28  | 48239,01 | 17838,36  | 29330,02 | 39624,445  | 23584,19   | 16040,255  |
| PRSS57  | 12354,84 | 28850,48 | 36623,97  | 11128,11 | 28,72     | 12967,25 | 22239,35   | 6497,985   | 15741,365  |
| GABRE   | 7920,15  | 10658,76 | 24617,84  | 19272,01 | 0         | 0        | 15617,19   | 0          | 15617,19   |
| SRSF3   | 40907,23 | 39744,38 | 38462,86  | 29698,81 | 20242,55  | 23089    | 37203,32   | 21665,775  | 15537,545  |
| PDE4DIP | 5117,58  | 18169,17 | 4771,88   | 35588,81 | 655,61    | 196,76   | 15911,86   | 426,185    | 15485,675  |
| CALM3   | 22592,58 | 36014,02 | 49700,66  | 51229,38 | 21765,73  | 27141,69 | 39884,16   | 24453,71   | 15430,45   |
| HYOU1   | 23781,84 | 13672,85 | 28571,41  | 24036,09 | 6174,95   | 8065,13  | 22515,5475 | 7120,04    | 15395,5075 |
| PDLIM1  | 14864,35 | 27274,18 | 9249,31   | 11160,09 | 94,85     | 663,22   | 15636,9825 | 379,035    | 15257,9475 |
| LAPTM4B | 24144,53 | 41821,32 | 12996,52  | 19355,57 | 8676,95   | 10000,08 | 24579,485  | 9338,515   | 15240,97   |
| RAB6B   | 7274,26  | 14012,78 | 5455,49   | 34258,02 | 51,2      | 47,91    | 15250,1375 | 49,555     | 15200,5825 |
| TAGLN2  | 70884,62 | 69324,06 | 71290,69  | 86197,56 | 63511,09  | 54953,41 | 74424,2325 | 59232,25   | 15191,9825 |
| EIF4B   | 43748,42 | 83380,24 | 35922,93  | 52781,04 | 46291,98  | 31464,52 | 53958,1575 | 38878,25   | 15079,9075 |
| PPAN    | 7151,89  | 6680,02  | 36967,39  | 27587,46 | 7349,9    | 1697,95  | 19596,69   | 4523,925   | 15072,765  |
| TXNIP   | 21009,57 | 26882,75 | 33590,06  | 17267,15 | 5938,52   | 13652,8  | 24687,3825 | 9795,66    | 14891,7225 |
| FAM117A | 8501,81  | 10463,87 | 36464,08  | 15628,69 | 2399,61   | 3606,05  | 17764,6125 | 3002,83    | 14761,7825 |
| CKB     | 19777,2  | 10041,14 | 29483,34  | 12156,89 | 1042,29   | 5467,58  | 17864,6425 | 3254,935   | 14609,7075 |
| ODC1    | 32871,71 | 22658,86 | 20855,56  | 10314,24 | 7326,42   | 6849,31  | 21675,0925 | 7087,865   | 14587,2275 |
| RPL7A   | 143885,4 | 159960,3 | 125499,02 | 137644,4 | 143397,32 | 111099,8 | 141747,27  | 127248,535 | 14498,735  |



|         |          |          |          |          |           |          |            |           |            |
|---------|----------|----------|----------|----------|-----------|----------|------------|-----------|------------|
| NCL     | 125723,2 | 101973,7 | 83934,12 | 78472,54 | 107048,48 | 59035,25 | 97525,8725 | 83041,865 | 14484,0075 |
| VCP     | 37308,14 | 27593,59 | 28921,24 | 25706,34 | 10401,57  | 20422,94 | 29882,3275 | 15412,255 | 14470,0725 |
| CTNBNL1 | 16507    | 11187,97 | 39537,56 | 23018,56 | 4672,87   | 11724,02 | 22562,7725 | 8198,445  | 14364,3275 |
| CA1     | 25146,56 | 5245,96  | 7854,75  | 18993,11 | 0         | 6,38     | 14310,095  | 3,19      | 14306,905  |
| MIF     | 50096,48 | 54904,41 | 58487,75 | 36919,32 | 57010,27  | 14746,41 | 50101,99   | 35878,34  | 14223,65   |
| PTPN1   | 11925,32 | 6712,81  | 27920,77 | 36075,11 | 2623,81   | 10457,02 | 20658,5025 | 6540,415  | 14118,0875 |
| STIP1   | 31805,66 | 21802,4  | 21650,68 | 28289,8  | 12207,93  | 11391,26 | 25887,135  | 11799,595 | 14087,54   |
| SRSF2   | 45342,45 | 64015,8  | 32969,8  | 34365,78 | 30508,4   | 29705,29 | 44173,4575 | 30106,845 | 14066,6125 |
| ARL6IP4 | 21310,29 | 14236,36 | 42002,02 | 16416,46 | 10131,41  | 8731,99  | 23491,2825 | 9431,7    | 14059,5825 |
| MCM3    | 34806,16 | 22406,29 | 22126,44 | 42734,56 | 11414,6   | 21623,62 | 30518,3625 | 16519,11  | 13999,2525 |
| HPGD    | 15613,64 | 6925,72  | 16321,99 | 17125,04 | 0         | 2,47     | 13996,5975 | 1,235     | 13995,3625 |
| COX6B1  | 11617,13 | 7939,6   | 54427,03 | 16566,63 | 12581,03  | 4858,11  | 22637,5975 | 8719,57   | 13918,0275 |
| PKN1    | 27270,03 | 30592,13 | 35793,61 | 41843,26 | 22875,7   | 17265,93 | 33874,7575 | 20070,815 | 13803,9425 |
| EIF3B   | 26346,16 | 36282,6  | 33877,73 | 30337,55 | 20454,76  | 15565,31 | 31711,01   | 18010,035 | 13700,975  |
| TIMP1   | 24248,58 | 16842,79 | 24674,42 | 16178,66 | 8468,46   | 5242,74  | 20486,1125 | 6855,6    | 13630,5125 |
| ATP5F1A | 55869,06 | 53141,75 | 49139,67 | 51602,39 | 48324,14  | 29360,6  | 52438,2175 | 38842,37  | 13595,8475 |
| BTK     | 16313,57 | 8483,59  | 40326,27 | 15507,7  | 9928,96   | 3254,53  | 20157,7825 | 6591,745  | 13566,0375 |
| PLIN2   | 4674,31  | 7382,87  | 9743,98  | 66287,7  | 15287,62  | 1969,97  | 22022,215  | 8628,795  | 13393,42   |
| MARS1   | 15387,71 | 10299,59 | 19349,14 | 20672,12 | 2512,53   | 3589,6   | 16427,14   | 3051,065  | 13376,075  |
| RRP1B   | 14052,9  | 6887,95  | 33699,56 | 17203,21 | 3341,43   | 5901,71  | 17960,905  | 4621,57   | 13339,335  |
| MTSS1   | 10807,44 | 26610,42 | 8434,1   | 8450,38  | 400,55    | 229,25   | 13575,585  | 314,9     | 13260,685  |
| JUP     | 4749,42  | 26675,16 | 26025,2  | 8118,5   | 83,19     | 6234,44  | 16392,07   | 3158,815  | 13233,255  |
| FXYD5   | 14937,58 | 5908,86  | 39004,54 | 12639,48 | 5870,87   | 3914,29  | 18122,615  | 4892,58   | 13230,035  |
| CAPN1   | 15709,2  | 25621,04 | 18911,92 | 21405,88 | 6194,05   | 8269,78  | 20412,01   | 7231,915  | 13180,095  |
| KEAP1   | 9817,21  | 9069,41  | 34331,35 | 29491,94 | 8575,38   | 6557,19  | 20677,4775 | 7566,285  | 13111,1925 |
| ADCY7   | 10160,87 | 15113    | 5527,23  | 29310,97 | 661,42    | 3190,94  | 15028,0175 | 1926,18   | 13101,8375 |
| RPS25   | 69825,12 | 46154,81 | 86787,86 | 70718,99 | 90041,05  | 20556,48 | 68371,695  | 55298,765 | 13072,93   |
| TUBA1C  | 40317,31 | 24253,51 | 41299    | 35428,79 | 22231,77  | 22297,64 | 35324,6525 | 22264,705 | 13059,9475 |
| PPP6R1  | 23296,93 | 36813,92 | 29385,91 | 46984,32 | 21051,98  | 21090,39 | 34120,27   | 21071,185 | 13049,085  |
| LUC7L3  | 22155,23 | 24006,12 | 61199,71 | 22300,74 | 18190,82  | 20580,97 | 32415,45   | 19385,895 | 13029,555  |
| IGF2BP1 | 22578,73 | 18354,41 | 11347,2  | 0        | 105,43    | 1,66     | 13070,085  | 53,545    | 13016,54   |
| COTL1   | 36484,38 | 16955,25 | 33248,09 | 23982,36 | 24084,5   | 5247,42  | 27667,52   | 14665,96  | 13001,56   |
| TTC3    | 16061,38 | 17536,48 | 40232,75 | 13231,25 | 6259,81   | 11388,01 | 21765,465  | 8823,91   | 12941,555  |

|                |          |          |          |          |           |          |            |           |            |
|----------------|----------|----------|----------|----------|-----------|----------|------------|-----------|------------|
| <b>RPS12</b>   | 75438,19 | 75845,09 | 88365,26 | 93071,99 | 105136,26 | 35439,97 | 83180,1325 | 70288,115 | 12892,0175 |
| <b>RPS26</b>   | 23857,09 | 14296,66 | 59392,39 | 18272,9  | 17542,46  | 14632,2  | 28954,76   | 16087,33  | 12867,43   |
| <b>PDIA6</b>   | 35574,16 | 24712,9  | 38894,14 | 15386,53 | 22011,12  | 9613,09  | 28641,9325 | 15812,105 | 12829,8275 |
| <b>SERF2</b>   | 34787,13 | 34044,6  | 78251,91 | 33148,6  | 45892,25  | 18638,11 | 45058,06   | 32265,18  | 12792,88   |
| <b>VEGFA</b>   | 10179,75 | 2370,97  | 35450,02 | 21942,14 | 7348,43   | 2406,65  | 17485,72   | 4877,54   | 12608,18   |
| <b>CPSF1</b>   | 17990,43 | 30011,01 | 39143,1  | 26400,27 | 24550,02  | 7082,29  | 28386,2025 | 15816,155 | 12570,0475 |
| <b>SLC44A2</b> | 4859,12  | 4206,12  | 26635,67 | 25332,96 | 664,1     | 4717,32  | 15258,4675 | 2690,71   | 12567,7575 |
| <b>RPS4Y1</b>  | 29944,42 | 0        | 1,11     | 21142,03 | 473,83    | 8,75     | 12771,89   | 241,29    | 12530,6    |
| <b>DDB1</b>    | 26939,66 | 28438,43 | 28176,29 | 28917,47 | 12724,39  | 18516,77 | 28117,9625 | 15620,58  | 12497,3825 |
| <b>CCT8</b>    | 60036,54 | 34455,71 | 93282,46 | 41283,91 | 73995,64  | 15646,29 | 57264,655  | 44820,965 | 12443,69   |
| <b>YBX3</b>    | 18951,22 | 17347,05 | 29550,93 | 15587,89 | 15860,62  | 6,46     | 20359,2725 | 7933,54   | 12425,7325 |
| <b>PRKDC</b>   | 76903,63 | 45394,66 | 46558,18 | 52647,08 | 62784,19  | 23222,86 | 55375,8875 | 43003,525 | 12372,3625 |
| <b>BAG6</b>    | 19727,95 | 23944,05 | 37266,31 | 28310,35 | 22199,08  | 7817,89  | 27312,165  | 15008,485 | 12303,68   |
| <b>EIF4G1</b>  | 45957,9  | 47287,95 | 33272,36 | 29252,64 | 28743,74  | 24579,71 | 38942,7125 | 26661,725 | 12280,9875 |
| <b>ARHGDIA</b> | 26831,19 | 32897,78 | 29041,91 | 27781,68 | 20167,28  | 13548,25 | 29138,14   | 16857,765 | 12280,375  |
| <b>HSP90B1</b> | 76595,22 | 74104,85 | 64826,95 | 37900,29 | 73354,16  | 28847,27 | 63356,8275 | 51100,715 | 12256,1125 |
| <b>TIE1</b>    | 11902,14 | 6124,95  | 28109,47 | 3479,61  | 0         | 301,55   | 12404,0425 | 150,775   | 12253,2675 |
| <b>WARS1</b>   | 12801,74 | 9234,57  | 22930,87 | 27050,49 | 5492,21   | 6354,86  | 18004,4175 | 5923,535  | 12080,8825 |
| <b>GCN1</b>    | 20803,55 | 24447,64 | 25759,77 | 24856,71 | 7973,72   | 15847,41 | 23966,9175 | 11910,565 | 12056,3525 |
| <b>ALDH1A1</b> | 18690,3  | 13411,02 | 54447,5  | 4506,03  | 298,21    | 21226,44 | 22763,7125 | 10762,325 | 12001,3875 |
| <b>ANGPTL6</b> | 2304,2   | 4692,81  | 15228,41 | 26099,88 | 9,65      | 221,56   | 12081,325  | 115,605   | 11965,72   |
| <b>MPIG6B</b>  | 24458,88 | 2504     | 15648,01 | 6525,54  | 1,6       | 682,85   | 12284,1075 | 342,225   | 11941,8825 |
| <b>AARS1</b>   | 29571,65 | 14354,37 | 16163,77 | 20708,15 | 11339,8   | 5207,6   | 20199,485  | 8273,7    | 11925,785  |
| <b>TOMM40</b>  | 18957,65 | 16910,82 | 29615,26 | 19911,25 | 9869,14   | 9045,01  | 21348,745  | 9457,075  | 11891,67   |
| <b>VPS51</b>   | 7092,08  | 27136,32 | 22382,42 | 16573,13 | 8458,81   | 4467,35  | 18295,9875 | 6463,08   | 11832,9075 |
| <b>PRMT1</b>   | 25241,56 | 30760,01 | 35928,32 | 24699,01 | 23547,68  | 11147,24 | 29157,225  | 17347,46  | 11809,765  |
| <b>NOP53</b>   | 22468,97 | 41024,94 | 55915,29 | 26255,46 | 35137,62  | 14093,34 | 36416,165  | 24615,48  | 11800,685  |
| <b>FLOT2</b>   | 11666,28 | 16956,31 | 29002,18 | 13655,97 | 6596,48   | 5741,02  | 17820,185  | 6168,75   | 11651,435  |
| <b>UBA1</b>    | 46635,44 | 28119,46 | 24355,72 | 22273,22 | 17960,37  | 19481,87 | 30345,96   | 18721,12  | 11624,84   |
| <b>FARP1</b>   | 6103,35  | 86,42    | 41810,02 | 228,45   | 55,58     | 811,46   | 12057,06   | 433,52    | 11623,54   |
| <b>RAB8A</b>   | 11505,93 | 11056,88 | 25296,43 | 19163,14 | 2640,85   | 7639,98  | 16755,595  | 5140,415  | 11615,18   |
| <b>PRPF19</b>  | 21989,43 | 24131,18 | 23684,41 | 26785,68 | 9306,22   | 15795,69 | 24147,675  | 12550,955 | 11596,72   |
| <b>FBL</b>     | 26329,68 | 21122,02 | 28847    | 28678,42 | 19708,69  | 9645,26  | 26244,28   | 14676,975 | 11567,305  |

|                  |          |          |          |          |          |          |            |           |            |
|------------------|----------|----------|----------|----------|----------|----------|------------|-----------|------------|
| <b>LMNA</b>      | 5127,45  | 22241,25 | 10151,49 | 52949,2  | 19715,77 | 2403,39  | 22617,3475 | 11059,58  | 11557,7675 |
| <b>LONP1</b>     | 18559,89 | 17834,65 | 23647,22 | 42209,8  | 22833,43 | 5204,96  | 25562,89   | 14019,195 | 11543,695  |
| <b>WDR1</b>      | 27285,12 | 33396,71 | 19986,81 | 24456,37 | 16935,91 | 12625,2  | 26281,2525 | 14780,555 | 11500,6975 |
| <b>SOS1</b>      | 21875,22 | 9955,97  | 10196,01 | 14160,23 | 1080,33  | 4039,88  | 14046,8575 | 2560,105  | 11486,7525 |
| <b>RUVBL2</b>    | 15030,8  | 24493,35 | 25977,28 | 26863,56 | 15386,94 | 7846,74  | 23091,2475 | 11616,84  | 11474,4075 |
| <b>RNF130</b>    | 18014,87 | 19052,78 | 23112,39 | 20404,93 | 5562,18  | 11888,21 | 20146,2425 | 8725,195  | 11421,0475 |
| <b>HMGB1</b>     | 39428,33 | 63567,28 | 45302,03 | 43578,25 | 36363,7  | 36928,09 | 47968,9725 | 36645,895 | 11323,0775 |
| <b>SAMSN1</b>    | 9991,5   | 6266,92  | 27387,4  | 6801,31  | 853,71   | 1726,36  | 12611,7825 | 1290,035  | 11321,7475 |
| <b>TFDP1</b>     | 24792,47 | 12042,07 | 9986,47  | 19537,8  | 10589,48 | 92,61    | 16589,7025 | 5341,045  | 11248,6575 |
| <b>CAPNS1</b>    | 12808,74 | 15163,39 | 47414,38 | 16338,2  | 14153,91 | 9232,5   | 22931,1775 | 11693,205 | 11237,9725 |
| <b>MEST</b>      | 14650,61 | 6807,21  | 17995,73 | 5943,01  | 181,64   | 41,38    | 11349,14   | 111,51    | 11237,63   |
| <b>NOC2L</b>     | 15134,84 | 12776,38 | 20673,2  | 22708,42 | 7326,03  | 5847,53  | 17823,21   | 6586,78   | 11236,43   |
| <b>STXBP5</b>    | 30901,81 | 12405,58 | 8345,9   | 18658,67 | 166,03   | 12542,39 | 17577,99   | 6354,21   | 11223,78   |
| <b>CLIC1</b>     | 35434,96 | 34017,37 | 54659,12 | 54233,4  | 54890,94 | 11883,75 | 44586,2125 | 33387,345 | 11198,8675 |
| <b>UNC13D</b>    | 21084,13 | 30357,79 | 26671,5  | 26725,96 | 19454,83 | 10576,53 | 26209,845  | 15015,68  | 11194,165  |
| <b>RPL24</b>     | 65270,8  | 84510,2  | 91075,15 | 47052,86 | 97929,58 | 23736,02 | 71977,2525 | 60832,8   | 11144,4525 |
| <b>STXBP2</b>    | 8908,36  | 12939,57 | 19168,2  | 30172,59 | 13319,69 | 46,16    | 17797,18   | 6682,925  | 11114,255  |
| <b>FSCN1</b>     | 9954,34  | 3897,9   | 35439,47 | 23019,49 | 1079,34  | 12903,66 | 18077,8    | 6991,5    | 11086,3    |
| <b>ATP7B</b>     | 18266,46 | 13398,05 | 3498,83  | 11801,26 | 59,83    | 1266,65  | 11741,15   | 663,24    | 11077,91   |
| <b>CD164</b>     | 41800,2  | 36125,71 | 34360,59 | 15714,78 | 15272,33 | 26574,31 | 32000,32   | 20923,32  | 11077      |
| <b>SNRPD2</b>    | 18046,95 | 16994,45 | 44770,28 | 21988,38 | 19112,42 | 9728,54  | 25450,015  | 14420,48  | 11029,535  |
| <b>MACROH2A1</b> | 36670,21 | 42655,63 | 46006,46 | 33655,41 | 19720,65 | 37770,54 | 39746,9275 | 28745,595 | 11001,3325 |
| <b>TPM3</b>      | 42388,85 | 39197,16 | 58887,02 | 69795,84 | 43824,63 | 39437,62 | 52567,2175 | 41631,125 | 10936,0925 |
| <b>RCC2</b>      | 32510,3  | 28334,47 | 34935,56 | 29396,73 | 10902,52 | 29828,86 | 31294,265  | 20365,69  | 10928,575  |
| <b>COL18A1</b>   | 30725,75 | 2117,43  | 11199,8  | 5922,38  | 2242,57  | 990,17   | 12491,34   | 1616,37   | 10874,97   |
| <b>POLR2A</b>    | 14397,63 | 30012,46 | 22809,21 | 21005,76 | 9111,92  | 13401,62 | 22056,265  | 11256,77  | 10799,495  |
| <b>LIMD2</b>     | 10474,19 | 14157,16 | 15200,38 | 16059,98 | 2172,99  | 4237,65  | 13972,9275 | 3205,32   | 10767,6075 |
| <b>SERBP1</b>    | 57259,84 | 57518,8  | 48078,33 | 59499,45 | 60863,9  | 28812,74 | 55589,105  | 44838,32  | 10750,785  |
| <b>GATD3B</b>    | 4943,46  | 4426,54  | 36561,49 | 14878,27 | 4067,02  | 4893,93  | 15202,44   | 4480,475  | 10721,965  |
| <b>RPS7</b>      | 76167,7  | 69302,02 | 84842,13 | 34305,75 | 94867,42 | 16004,56 | 66154,4    | 55435,99  | 10718,41   |
| <b>KPNB1</b>     | 52604,03 | 40961,81 | 31452,04 | 38230,52 | 23576,6  | 36633,25 | 40812,1    | 30104,925 | 10707,175  |
| <b>JUND</b>      | 10941,71 | 18074,8  | 20036,02 | 19814,9  | 8875,57  | 4250,32  | 17216,8575 | 6562,945  | 10653,9125 |
| <b>EI24</b>      | 36827,98 | 11479,87 | 5946,33  | 11013,94 | 5315,59  | 6015,28  | 16317,03   | 5665,435  | 10651,595  |



|                 |          |          |           |          |           |          |            |           |            |
|-----------------|----------|----------|-----------|----------|-----------|----------|------------|-----------|------------|
| <b>NOP56</b>    | 37480,94 | 20299,61 | 20533,21  | 19501,67 | 16151,75  | 11480,44 | 24453,8575 | 13816,095 | 10637,7625 |
| <b>MGAT4B</b>   | 20927,97 | 16387,43 | 14321,81  | 25167,72 | 4713,59   | 12472,93 | 19201,2325 | 8593,26   | 10607,9725 |
| <b>TALDO1</b>   | 32147,29 | 13019,11 | 29539     | 32022,28 | 17717,48  | 14514,67 | 26681,92   | 16116,075 | 10565,845  |
| <b>RRBP1</b>    | 8046,21  | 12582,65 | 26324,84  | 24889,01 | 7654,97   | 7171,62  | 17960,6775 | 7413,295  | 10547,3825 |
| <b>SREBF1</b>   | 12679,44 | 19069,27 | 28596,26  | 12991,88 | 9446,36   | 6321,45  | 18334,2125 | 7883,905  | 10450,3075 |
| <b>GART</b>     | 21053,73 | 13657,14 | 12683,67  | 32952,86 | 9776,73   | 9542,24  | 20086,85   | 9659,485  | 10427,365  |
| <b>UBASH3B</b>  | 7215,61  | 3005,32  | 16275,37  | 21318,61 | 628,72    | 2492,1   | 11953,7275 | 1560,41   | 10393,3175 |
| <b>RACK1</b>    | 111210   | 124999,5 | 88823,67  | 112938,9 | 136953,8  | 61353,31 | 109493,043 | 99153,555 | 10339,4875 |
| <b>HS6ST1</b>   | 8174,69  | 14888,55 | 11443,18  | 13928,44 | 286,36    | 3271,54  | 12108,715  | 1778,95   | 10329,765  |
| <b>ICAM5</b>    | 2385,61  | 4520,39  | 20746,47  | 15857,75 | 221,12    | 1040,36  | 10877,555  | 630,74    | 10246,815  |
| <b>CFH</b>      | 11750,68 | 7536,43  | 14367,76  | 7930,07  | 39,38     | 367,98   | 10396,235  | 203,68    | 10192,555  |
| <b>PITX1</b>    | 48,26    | 23989,38 | 6966,28   | 10527,96 | 9,7       | 425,31   | 10382,97   | 217,505   | 10165,465  |
| <b>BCAT1</b>    | 22561,25 | 20833,04 | 15257,33  | 12564,47 | 646,46    | 14651,81 | 17804,0225 | 7649,135  | 10154,8875 |
| <b>H2AX</b>     | 21353,78 | 17975,5  | 16054,45  | 15551,68 | 5192,75   | 9971,74  | 17733,8525 | 7582,245  | 10151,6075 |
| <b>ATP2A3</b>   | 13677,22 | 35088,45 | 26879,48  | 27666,88 | 4839,19   | 26641,48 | 25828,0075 | 15740,335 | 10087,6725 |
| <b>IFITM1</b>   | 2168,91  | 7716,48  | 34345,59  | 3844,69  | 2,63      | 3879,31  | 12018,9175 | 1940,97   | 10077,9475 |
| <b>AP1B1</b>    | 14930,22 | 12812,83 | 21665,51  | 16052,12 | 4577,62   | 8051,9   | 16365,17   | 6314,76   | 10050,41   |
| <b>DKC1</b>     | 22204,98 | 15991,06 | 23103,55  | 27619,9  | 13057,01  | 11359,56 | 22229,8725 | 12208,285 | 10021,5875 |
| <b>MYO9B</b>    | 7821,07  | 11949,85 | 21359,32  | 42710,79 | 10014,65  | 11863    | 20960,2575 | 10938,825 | 10021,4325 |
| <b>HBS1L</b>    | 9855,95  | 8664,41  | 11753,02  | 29697,19 | 3500,57   | 6596,14  | 14992,6425 | 5048,355  | 9944,2875  |
| <b>ASAH1</b>    | 27266,58 | 9775,25  | 20234,96  | 8269,79  | 6970,25   | 5917,38  | 16386,645  | 6443,815  | 9942,83    |
| <b>PLA2G6</b>   | 8275,48  | 16404,71 | 13075,6   | 9520,61  | 928,23    | 2861,2   | 11819,1    | 1894,715  | 9924,385   |
| <b>UBAC1</b>    | 11102,3  | 9448,95  | 13350,52  | 20714,3  | 3079,46   | 4468,66  | 13654,0175 | 3774,06   | 9879,9575  |
| <b>YIF1B</b>    | 8611,08  | 10583,14 | 21780,67  | 20692,96 | 5223,13   | 5893,44  | 15416,9625 | 5558,285  | 9858,6775  |
| <b>IL2RG</b>    | 13640,48 | 17626,71 | 15370,06  | 6040,11  | 690,27    | 6081,15  | 13169,34   | 3385,71   | 9783,63    |
| <b>U2AF2</b>    | 24456,95 | 32086,44 | 29497,34  | 28798,47 | 22292,48  | 15609,39 | 28709,8    | 18950,935 | 9758,865   |
| <b>ATP5PO</b>   | 24466,72 | 11637,49 | 37161,85  | 16124,62 | 16949,38  | 8243,49  | 22347,67   | 12596,435 | 9751,235   |
| <b>HNRNPUL1</b> | 28988,68 | 32728,33 | 43919,99  | 35209,29 | 21117     | 29907,26 | 35211,5725 | 25512,13  | 9699,4425  |
| <b>CTSH</b>     | 3294,14  | 20877,02 | 9159,76   | 12735,21 | 3206,69   | 433,1    | 11516,5325 | 1819,895  | 9696,6375  |
| <b>PLCXD1</b>   | 27687,55 | 9219,35  | 5505,85   | 8013,33  | 897,66    | 4925,35  | 12606,52   | 2911,505  | 9695,015   |
| <b>ITGA4</b>    | 44502,58 | 26532,41 | 36587,07  | 11511,71 | 9042,62   | 31196,13 | 29783,4425 | 20119,375 | 9664,0675  |
| <b>PKM</b>      | 111286,5 | 78650,97 | 157400,58 | 51153,43 | 108480,73 | 71463,61 | 99622,8625 | 89972,17  | 9650,6925  |
| <b>CCT3</b>     | 45146,4  | 29983,56 | 30176,21  | 43522,67 | 37860,19  | 17324,39 | 37207,21   | 27592,29  | 9614,92    |

|                |          |          |          |          |          |          |            |           |           |
|----------------|----------|----------|----------|----------|----------|----------|------------|-----------|-----------|
| <b>PNN</b>     | 23572,83 | 27026,73 | 30302,15 | 17069,24 | 9851,53  | 20113,42 | 24492,7375 | 14982,475 | 9510,2625 |
| <b>AGPAT3</b>  | 12217,17 | 10091,33 | 16925,67 | 17171,43 | 4275,69  | 4921,64  | 14101,4    | 4598,665  | 9502,735  |
| <b>KRI1</b>    | 4255,33  | 6320,73  | 28505,57 | 18624,34 | 4328,11  | 5528,5   | 14426,4925 | 4928,305  | 9498,1875 |
| <b>IRX1</b>    | 8324,96  | 10520,88 | 13678,36 | 5456,82  | 0        | 0        | 9495,255   | 0         | 9495,255  |
| <b>ADD2</b>    | 2760,6   | 23181,84 | 3665,53  | 14481,76 | 568,51   | 2526,53  | 11022,4325 | 1547,52   | 9474,9125 |
| <b>ATP1A1</b>  | 37334,74 | 22910,21 | 37814,66 | 30039,54 | 19346,82 | 25776,79 | 32024,7875 | 22561,805 | 9462,9825 |
| <b>NUDT3</b>   | 13129,18 | 16738,21 | 20882,58 | 9228,99  | 6971,02  | 4214,38  | 14994,74   | 5592,7    | 9402,04   |
| <b>DLC1</b>    | 11842,25 | 13753,41 | 3232,3   | 8730,05  | 0        | 18,04    | 9389,5025  | 9,02      | 9380,4825 |
| <b>IFITM2</b>  | 11007,79 | 10414,75 | 28958,53 | 8428,93  | 6572,95  | 4139,57  | 14702,5    | 5356,26   | 9346,24   |
| <b>ATP5F1B</b> | 83182,71 | 63785,55 | 55617,52 | 62295,42 | 75442,55 | 38328,91 | 66220,3    | 56885,73  | 9334,57   |
| <b>CCT2</b>    | 29901,66 | 25928,26 | 22998,39 | 29350,6  | 19371,48 | 16051,8  | 27044,7275 | 17711,64  | 9333,0875 |
| <b>ANPEP</b>   | 4380,36  | 6255,61  | 17977,22 | 10840,01 | 994,31   | 206,98   | 9863,3     | 600,645   | 9262,655  |
| <b>PTPN7</b>   | 23554,48 | 26829,41 | 17454,17 | 32242,85 | 18718,7  | 12837,73 | 25020,2275 | 15778,215 | 9242,0125 |
| <b>STOM</b>    | 18462,71 | 11379,11 | 7061,5   | 24916,96 | 2265,01  | 10175,87 | 15455,07   | 6220,44   | 9234,63   |
| <b>NECTIN2</b> | 6349,04  | 4635,64  | 31775,65 | 8941,67  | 1146,74  | 6491,92  | 12925,5    | 3819,33   | 9106,17   |
| <b>UBXN6</b>   | 6146,92  | 6780,12  | 14074,72 | 31641,9  | 7785,67  | 3374,61  | 14660,915  | 5580,14   | 9080,775  |
| <b>CARM1</b>   | 6348,98  | 5604,74  | 16043,51 | 20399,38 | 3959,6   | 2098,71  | 12099,1525 | 3029,155  | 9069,9975 |
| <b>PA2G4</b>   | 36637,35 | 28522,24 | 21444,55 | 32323,52 | 23928,67 | 17426,51 | 29731,915  | 20677,59  | 9054,325  |
| <b>ICAM3</b>   | 4332,08  | 5627,56  | 28147,18 | 10350,93 | 963,84   | 5159,09  | 12114,4375 | 3061,465  | 9052,9725 |
| <b>CD151</b>   | 11093,5  | 13400,39 | 20167,13 | 11982,78 | 6617,52  | 3648,17  | 14160,95   | 5132,845  | 9028,105  |
| <b>DCTN1</b>   | 12919,65 | 14916,13 | 28301,27 | 16788,57 | 9940,26  | 8527,25  | 18231,405  | 9233,755  | 8997,65   |
| <b>MYH10</b>   | 14971,49 | 16738,94 | 12080,27 | 12458,94 | 49,06    | 10090,36 | 14062,41   | 5069,71   | 8992,7    |
| <b>KDM1A</b>   | 19074,57 | 21506,32 | 32729,55 | 17035,2  | 12611,66 | 14585,68 | 22586,41   | 13598,67  | 8987,74   |
| <b>RBM3</b>    | 34331,51 | 25819,94 | 16863,45 | 17138,14 | 20440,13 | 8691,8   | 23538,26   | 14565,965 | 8972,295  |
| <b>GOLGA8A</b> | 12377,55 | 28796,96 | 4519,22  | 469,36   | 4660,65  | 596,23   | 11540,7725 | 2628,44   | 8912,3325 |
| <b>LDHA</b>    | 132098,4 | 121245,3 | 66014,06 | 84362,92 | 125635,1 | 58453,77 | 100930,175 | 92044,435 | 8885,74   |
| <b>SRPRA</b>   | 18737,9  | 7636,05  | 16301,24 | 23853,75 | 9183,52  | 6382,5   | 16632,235  | 7783,01   | 8849,225  |
| <b>TMBIM1</b>  | 8698,01  | 11813,94 | 7344,44  | 15899,65 | 3294,76  | 890,97   | 10939,01   | 2092,865  | 8846,145  |
| <b>ST3GAL2</b> | 5774,23  | 16253,18 | 8553,99  | 10338,4  | 1572,3   | 1392,9   | 10229,95   | 1482,6    | 8747,35   |
| <b>TUFM</b>    | 27883,1  | 32307,07 | 23262,18 | 23301,92 | 19981,69 | 15916,77 | 26688,5675 | 17949,23  | 8739,3375 |
| <b>AP2M1</b>   | 27914,74 | 20741,55 | 39150,51 | 26764,19 | 24076,94 | 15778,49 | 28642,7475 | 19927,715 | 8715,0325 |
| <b>ATAD3A</b>  | 11138,3  | 11781,09 | 16284,09 | 15921,87 | 5797,57  | 4392,24  | 13781,3375 | 5094,905  | 8686,4325 |
| <b>MGAT3</b>   | 7348,28  | 7761,28  | 3914,04  | 16971,78 | 4,77     | 621,49   | 8998,845   | 313,13    | 8685,715  |

|                |          |          |          |          |          |          |            |           |           |
|----------------|----------|----------|----------|----------|----------|----------|------------|-----------|-----------|
| <b>CDKN2A</b>  | 0        | 2032,59  | 49240,81 | 0        | 338,56   | 7929,71  | 12818,35   | 4134,135  | 8684,215  |
| <b>SEC61A1</b> | 24659,37 | 19713,63 | 33054,02 | 21534,16 | 15042,34 | 17069,88 | 24740,295  | 16056,11  | 8684,185  |
| <b>CCT6A</b>   | 34797,68 | 22996,41 | 18474,09 | 20950,05 | 19226,13 | 12044,85 | 24304,5575 | 15635,49  | 8669,0675 |
| <b>EIF3I</b>   | 22325,97 | 17611,9  | 16564,12 | 21424,56 | 14069,55 | 7563,64  | 19481,6375 | 10816,595 | 8665,0425 |
| <b>PLIN3</b>   | 4905,47  | 11481,7  | 15412,79 | 24007,06 | 5866,74  | 4719,14  | 13951,755  | 5292,94   | 8658,815  |
| <b>UBR4</b>    | 24659,31 | 22861,35 | 64870,34 | 56780,45 | 22881,49 | 44388,13 | 42292,8625 | 33634,81  | 8658,0525 |
| <b>PECAM1</b>  | 11248,99 | 11493,49 | 13794,7  | 5100,84  | 2338,8   | 1202     | 10409,505  | 1770,4    | 8639,105  |
| <b>EPB41</b>   | 10816,92 | 14435,96 | 13158,8  | 17322,46 | 2006,39  | 8623,49  | 13933,535  | 5314,94   | 8618,595  |
| <b>FAM178B</b> | 955,01   | 3326,12  | 4828,67  | 25443,1  | 0        | 64,84    | 8638,225   | 32,42     | 8605,805  |
| <b>PHB2</b>    | 24978,47 | 30363,53 | 21840,64 | 16433,31 | 19973,96 | 9675,49  | 23403,9875 | 14824,725 | 8579,2625 |
| <b>SYNGR2</b>  | 7729,71  | 10989,36 | 15921,93 | 22788,91 | 7439,85  | 4143,52  | 14357,4775 | 5791,685  | 8565,7925 |
| <b>PSMD3</b>   | 16989,47 | 13953,57 | 14185,77 | 15842,48 | 6597,49  | 6789,54  | 15242,8225 | 6693,515  | 8549,3075 |
| <b>PHB</b>     | 23781,62 | 16707,8  | 19130,13 | 17938,51 | 13851,14 | 7829,89  | 19389,515  | 10840,515 | 8549      |
| <b>SRSF1</b>   | 29685,45 | 36234,4  | 19599,09 | 32091,02 | 12384,44 | 29328,26 | 29402,49   | 20856,35  | 8546,14   |
| <b>AP1M1</b>   | 7858,99  | 8357,89  | 15868,27 | 28757,61 | 7416,08  | 5949,1   | 15210,69   | 6682,59   | 8528,1    |
| <b>VAR51</b>   | 22657,21 | 19455,05 | 12984,03 | 20708,3  | 17240,96 | 3637,78  | 18951,1475 | 10439,37  | 8511,7775 |
| <b>EIF2S3</b>  | 47769,58 | 18994,08 | 16970,17 | 22902,09 | 21948,8  | 14380,87 | 26658,98   | 18164,835 | 8494,145  |
| <b>CHCHD2</b>  | 35158,76 | 29534,21 | 30686,55 | 19299,73 | 25125,31 | 15280,31 | 28669,8125 | 20202,81  | 8467,0025 |
| <b>SNRNP70</b> | 19863,83 | 30982,16 | 34516,17 | 22715,44 | 22443    | 14679,34 | 27019,4    | 18561,17  | 8458,23   |
| <b>GYPC</b>    | 9266,92  | 11050,77 | 7553,71  | 17959,66 | 3086,07  | 2936     | 11457,765  | 3011,035  | 8446,73   |
| <b>SNX5</b>    | 23340,52 | 24467,67 | 12181,96 | 18338,68 | 12366,94 | 9920,23  | 19582,2075 | 11143,585 | 8438,6225 |
| <b>CTNNA1</b>  | 12265,69 | 14383,29 | 14263,64 | 10684,65 | 8929,61  | 20,34    | 12899,3175 | 4474,975  | 8424,3425 |
| <b>STAT5B</b>  | 13148,79 | 18106,18 | 16783,04 | 18599,85 | 2878,06  | 13609,09 | 16659,465  | 8243,575  | 8415,89   |
| <b>USP48</b>   | 16583,38 | 12234,09 | 17714,75 | 18433,42 | 5903,51  | 9757,27  | 16241,41   | 7830,39   | 8411,02   |
| <b>BCAP31</b>  | 15273,94 | 13036,13 | 24440,89 | 23190,56 | 13019,02 | 8138,81  | 18985,38   | 10578,915 | 8406,465  |
| <b>CLUH</b>    | 7046,96  | 19101,28 | 17557,54 | 16391,45 | 9163,51  | 4120,31  | 15024,3075 | 6641,91   | 8382,3975 |
| <b>PPP2R1A</b> | 15687,4  | 27668,22 | 38626,24 | 17667,47 | 21433,82 | 11636,71 | 24912,3325 | 16535,265 | 8377,0675 |
| <b>ZNF385A</b> | 11936,78 | 13527,53 | 11452,51 | 8159,43  | 958,82   | 4860,09  | 11269,0625 | 2909,455  | 8359,6075 |
| <b>CTBP2</b>   | 10826,69 | 12763,9  | 4933,31  | 10935,5  | 3062,01  | 30,9     | 9864,85    | 1546,455  | 8318,395  |
| <b>PPP1CA</b>  | 25612,39 | 19617,39 | 21157,95 | 17570,73 | 11729,49 | 13621,87 | 20989,615  | 12675,68  | 8313,935  |
| <b>ITGB3</b>   | 13277,23 | 1522,6   | 13652,44 | 5681,28  | 18,12    | 441,56   | 8533,3875  | 229,84    | 8303,5475 |
| <b>RCL1</b>    | 2169,33  | 3712,94  | 2749,96  | 31370,26 | 2013,94  | 1389,02  | 10000,6225 | 1701,48   | 8299,1425 |
| <b>FARSA</b>   | 14940,6  | 8710,01  | 17792,61 | 28013    | 10613,12 | 7544,3   | 17364,055  | 9078,71   | 8285,345  |

|                 |          |          |          |          |          |          |            |           |           |
|-----------------|----------|----------|----------|----------|----------|----------|------------|-----------|-----------|
| <b>RNPS1</b>    | 23301,23 | 21157,7  | 20069,37 | 22410,88 | 19394,51 | 7569,5   | 21734,795  | 13482,005 | 8252,79   |
| <b>FCER1A</b>   | 23805,77 | 1207,88  | 17342,52 | 6888,27  | 2,96     | 8152,64  | 12311,11   | 4077,8    | 8233,31   |
| <b>STT3A</b>    | 25883,38 | 10109,73 | 15054,5  | 29778,08 | 11914,47 | 12065,59 | 20206,4225 | 11990,03  | 8216,3925 |
| <b>PLOD1</b>    | 6567,06  | 13009,52 | 24030,43 | 10865,97 | 9519,29  | 1344,91  | 13618,245  | 5432,1    | 8186,145  |
| <b>PYCR1</b>    | 10010,19 | 6624,83  | 8757,64  | 11354,88 | 2014,16  | 81,93    | 9186,885   | 1048,045  | 8138,84   |
| <b>DBN1</b>     | 15373,45 | 9397,53  | 22488,55 | 15426,16 | 10475,55 | 4615,24  | 15671,4225 | 7545,395  | 8126,0275 |
| <b>ABCF1</b>    | 12387,73 | 10837,32 | 17430,32 | 17880,32 | 9002     | 4016,3   | 14633,9225 | 6509,15   | 8124,7725 |
| <b>SERPINF1</b> | 386,44   | 2070,78  | 30001,55 | 83,58    | 20,13    | 17,36    | 8135,5875  | 18,745    | 8116,8425 |
| <b>EMP3</b>     | 12400,51 | 10663,72 | 23563,42 | 16580,34 | 12074,6  | 3296,36  | 15801,9975 | 7685,48   | 8116,5175 |
| <b>NUMA1</b>    | 23809,3  | 26489,88 | 27609,17 | 30149,86 | 14408,82 | 23424,38 | 27014,5525 | 18916,6   | 8097,9525 |
| <b>EPOR</b>     | 157,18   | 1473,6   | 14387,8  | 24485,28 | 1392,85  | 2731,9   | 10125,965  | 2062,375  | 8063,59   |
| <b>PSMD8</b>    | 16584,04 | 11574,58 | 20243,31 | 18497,17 | 10280,3  | 7045,91  | 16724,775  | 8663,105  | 8061,67   |
| <b>BANF1</b>    | 25628,47 | 11099,11 | 19084,74 | 12378,3  | 9210,66  | 8776,55  | 17047,655  | 8993,605  | 8054,05   |
| <b>MAN1A1</b>   | 7539,13  | 4584,92  | 4726,59  | 16528    | 579,94   | 3,5      | 8344,66    | 291,72    | 8052,94   |
| <b>TYK2</b>     | 7070,92  | 6552,91  | 33657,56 | 28353,89 | 15848,26 | 5913,12  | 18908,82   | 10880,69  | 8028,13   |
| <b>NARF</b>     | 5444,51  | 10614,95 | 32058,6  | 12751,38 | 7262,51  | 7133,14  | 15217,36   | 7197,825  | 8019,535  |
| <b>SAE1</b>     | 17684,1  | 16479,8  | 25582,4  | 20983,75 | 7448,28  | 16912,75 | 20182,5125 | 12180,515 | 8001,9975 |
| <b>CTSB</b>     | 10425,29 | 14118,77 | 20219,6  | 30608,9  | 17148,29 | 4551,42  | 18843,14   | 10849,855 | 7993,285  |
| <b>CTSD</b>     | 20609,02 | 15551,59 | 28722,41 | 18092,85 | 15163,87 | 10431,24 | 20743,9675 | 12797,555 | 7946,4125 |
| <b>UCP2</b>     | 16829,44 | 4182,36  | 9195,06  | 14883,35 | 1943,97  | 4734,48  | 11272,5525 | 3339,225  | 7933,3275 |
| <b>GSE1</b>     | 15387,15 | 24661,23 | 12480,29 | 19064,84 | 4139,74  | 15871,7  | 17898,3775 | 10005,72  | 7892,6575 |
| <b>HNRNPC</b>   | 65003,91 | 63962,93 | 54597,61 | 56945,12 | 74678,93 | 29798,74 | 60127,3925 | 52238,835 | 7888,5575 |
| <b>CAD</b>      | 29344,42 | 15430,5  | 23072,9  | 9576,25  | 14733,31 | 8281,01  | 19356,0175 | 11507,16  | 7848,8575 |
| <b>TBCD</b>     | 10974,68 | 10382,37 | 23619,25 | 7861,42  | 3322,07  | 7404,16  | 13209,43   | 5363,115  | 7846,315  |
| <b>HUWE1</b>    | 42211,15 | 26950,31 | 25083,24 | 25768,93 | 16814,72 | 27559,92 | 30003,4075 | 22187,32  | 7816,0875 |
| <b>PIM2</b>     | 7103,83  | 6757,29  | 13882,32 | 12280,66 | 1458,78  | 2944,42  | 10006,025  | 2201,6    | 7804,425  |
| <b>ISYNA1</b>   | 4385,88  | 17174,48 | 8043,61  | 23974,94 | 2102,33  | 9138,87  | 13394,7275 | 5620,6    | 7774,1275 |
| <b>FBRSL1</b>   | 13819,84 | 19289,76 | 16074,47 | 14235,74 | 7983,56  | 8184,27  | 15854,9525 | 8083,915  | 7771,0375 |
| <b>GSPT1</b>    | 20128,52 | 16063,94 | 13579,4  | 23368,43 | 15543    | 5520,51  | 18285,0725 | 10531,755 | 7753,3175 |
| <b>MTA2</b>     | 17395,76 | 18588,95 | 21023,56 | 16193,35 | 8997,23  | 12161,73 | 18300,405  | 10579,48  | 7720,925  |
| <b>EIF1</b>     | 25762,55 | 33751,33 | 43401,12 | 32846,57 | 38460,71 | 14029,65 | 33940,3925 | 26245,18  | 7695,2125 |
| <b>KCNK6</b>    | 4313,63  | 3681,21  | 20068,95 | 16539,25 | 2382,99  | 4529,83  | 11150,76   | 3456,41   | 7694,35   |
| <b>SDF4</b>     | 15271,52 | 11381,22 | 23154,37 | 14225,86 | 9600,31  | 7053,48  | 16008,2425 | 8326,895  | 7681,3475 |

|          |          |          |           |          |           |          |            |            |           |
|----------|----------|----------|-----------|----------|-----------|----------|------------|------------|-----------|
| MBOAT7   | 5963,68  | 7508,16  | 20122,59  | 17115,12 | 2766,15   | 7255,2   | 12677,3875 | 5010,675   | 7666,7125 |
| GRB10    | 6921,42  | 10051,7  | 6904,79   | 8097,82  | 541,03    | 125,24   | 7993,9325  | 333,135    | 7660,7975 |
| SERP1    | 14653,32 | 20276,21 | 20425     | 16749,56 | 13340,22  | 7390,4   | 18026,0225 | 10365,31   | 7660,7125 |
| PRAME    | 24497,07 | 669,38   | 12,83     | 5453,25  | 16,29     | 7,53     | 7658,1325  | 11,91      | 7646,2225 |
| MPST     | 8129,32  | 23139,68 | 9840,91   | 9797,42  | 6101,02   | 4127,02  | 12726,8325 | 5114,02    | 7612,8125 |
| TPSB2    | 26,64    | 15520,05 | 2579,29   | 15168,61 | 1,88      | 1433,72  | 8323,6475  | 717,8      | 7605,8475 |
| SARS1    | 10994,11 | 10604,06 | 13190,48  | 18876,97 | 7163,39   | 4469,13  | 13416,405  | 5816,26    | 7600,145  |
| MT-ND5   | 111759,3 | 179748,1 | 74015,61  | 113404,8 | 108087,45 | 116205,3 | 119731,968 | 112146,38  | 7585,5875 |
| TNFSF13B | 331,12   | 5,14     | 36724,51  | 272,73   | 2311,23   | 1199,51  | 9333,375   | 1755,37    | 7578,005  |
| DRAP1    | 14922,92 | 6987,68  | 16195,37  | 13856,53 | 4149,98   | 6675,68  | 12990,625  | 5412,83    | 7577,795  |
| FST      | 13359,16 | 534,98   | 8398,87   | 8108,93  | 29,05     | 30,44    | 7600,485   | 29,745     | 7570,74   |
| NUP62    | 12674,85 | 25038,53 | 17907,56  | 16204,31 | 8988,84   | 11797,36 | 17956,3125 | 10393,1    | 7563,2125 |
| EIF3K    | 14516,15 | 11546,04 | 30096,85  | 17015,38 | 14939,83  | 6523,77  | 18293,605  | 10731,8    | 7561,805  |
| ICAM4    | 3146,81  | 7747,15  | 21624,68  | 6805,36  | 7,24      | 4582,33  | 9831       | 2294,785   | 7536,215  |
| NCF4     | 25855,1  | 16230,79 | 34649,99  | 14117,01 | 29046,64  | 1326,94  | 22713,2225 | 15186,79   | 7526,4325 |
| NRROS    | 10927,28 | 11657,68 | 13411,13  | 12049,11 | 3407,37   | 5571,41  | 12011,3    | 4489,39    | 7521,91   |
| YARS1    | 15554,94 | 15231,06 | 33402,79  | 20421,92 | 11919,16  | 15367,34 | 21152,6775 | 13643,25   | 7509,4275 |
| SPTBN2   | 320,52   | 27802,98 | 643,95    | 33871,76 | 18,49     | 16299,12 | 15659,8025 | 8158,805   | 7500,9975 |
| PSMD2    | 22423,44 | 16657,27 | 15098,38  | 15441,37 | 8635,24   | 11194,4  | 17405,115  | 9914,82    | 7490,295  |
| SUPT5H   | 8454,81  | 13676,28 | 28369,7   | 14232,17 | 8582,51   | 8824,63  | 16183,24   | 8703,57    | 7479,67   |
| GANAB    | 33569,88 | 39550,46 | 43659,02  | 28754,46 | 29231,66  | 28600,36 | 36383,455  | 28916,01   | 7467,445  |
| MLLT1    | 7361,46  | 10717,77 | 9128,09   | 30119,97 | 6597,95   | 7131,16  | 14331,8225 | 6864,555   | 7467,2675 |
| PARP1    | 43655,9  | 25600,96 | 28961,93  | 29958,26 | 16320,61  | 32839,5  | 32044,2625 | 24580,055  | 7464,2075 |
| ACTB     | 383943,6 | 354823,2 | 356225,83 | 338545,4 | 516779,62 | 185107,9 | 358384,515 | 350943,775 | 7440,74   |
| FASN     | 86296,1  | 61085,87 | 53122,44  | 36505,49 | 76786,68  | 26849,2  | 59252,475  | 51817,94   | 7434,535  |
| MCM3AP   | 10833,7  | 11737,88 | 17333,49  | 12570,86 | 4759,92   | 6664,19  | 13118,9825 | 5712,055   | 7406,9275 |
| ACSL4    | 28932,8  | 2788,86  | 14292,55  | 10827,89 | 5902,13   | 7722,21  | 14210,525  | 6812,17    | 7398,355  |
| LTBP4    | 2558,22  | 2096,73  | 34666,3   | 7475,6   | 4096,39   | 4539,58  | 11699,2125 | 4317,985   | 7381,2275 |
| ANAPC5   | 17405,13 | 15293,08 | 25225,93  | 14738,76 | 10534,28  | 11118,59 | 18165,725  | 10826,435  | 7339,29   |
| PFAS     | 14406,37 | 15442,64 | 7168,67   | 8664,93  | 5674,9    | 2494,54  | 11420,6525 | 4084,72    | 7335,9325 |
| EEF1G    | 186314,5 | 172788,5 | 219187,18 | 171931,9 | 269578,16 | 90862,21 | 187555,528 | 180220,185 | 7335,3425 |
| EBNA1BP2 | 11890,71 | 6413,33  | 14881,15  | 12067,93 | 5156,53   | 2827,1   | 11313,28   | 3991,815   | 7321,465  |
| MRPS12   | 10794,48 | 4542,4   | 9817,52   | 13354,36 | 3578,12   | 1038,51  | 9627,19    | 2308,315   | 7318,875  |



|            |          |          |          |          |          |          |            |           |           |
|------------|----------|----------|----------|----------|----------|----------|------------|-----------|-----------|
| CTSW       | 7074,36  | 11631,65 | 19965,3  | 674,06   | 6,07     | 5032,12  | 9836,3425  | 2519,095  | 7317,2475 |
| NOLC1      | 24379,37 | 21978,61 | 13400    | 16041,93 | 11748,95 | 11573,08 | 18949,9775 | 11661,015 | 7288,9625 |
| DHX9       | 37194,48 | 26067,98 | 22681,57 | 30196,49 | 17029,64 | 26509,63 | 29035,13   | 21769,635 | 7265,495  |
| CYC1       | 15915,36 | 28164,31 | 11603,88 | 14091,62 | 17304,25 | 3129,11  | 17443,7925 | 10216,68  | 7227,1125 |
| ADAM15     | 11457,23 | 7687,78  | 12915,9  | 13905,14 | 7818,46  | 760,43   | 11491,5125 | 4289,445  | 7202,0675 |
| POLD1      | 12302,32 | 24761,64 | 16948,66 | 16567,33 | 9997,76  | 10910,32 | 17644,9875 | 10454,04  | 7190,9475 |
| TTLL12     | 13130,31 | 18259,38 | 10560,81 | 14883,09 | 6016     | 8040,81  | 14208,3975 | 7028,405  | 7179,9925 |
| FLOT1      | 5429,01  | 6688,32  | 17512,1  | 15722,96 | 5014,53  | 3306,2   | 11338,0975 | 4160,365  | 7177,7325 |
| WDR83OS    | 4741,44  | 4651,49  | 29270,73 | 6202,43  | 6087,59  | 1996,42  | 11216,5225 | 4042,005  | 7174,5175 |
| LGALS9     | 3728,51  | 3295,72  | 18103,38 | 6867,02  | 1480,94  | 206,52   | 7998,6575  | 843,73    | 7154,9275 |
| ALDH16A1   | 7327,47  | 6060,04  | 14601,77 | 9508,23  | 1873,1   | 2593,63  | 9374,3775  | 2233,365  | 7141,0125 |
| FKBP1A     | 19450,81 | 19190,51 | 18739,9  | 18773,59 | 11364,76 | 12442,79 | 19038,7025 | 11903,775 | 7134,9275 |
| HSH2D      | 9639,8   | 15463,05 | 20810,27 | 9416,59  | 463,54   | 12933,6  | 13832,4275 | 6698,57   | 7133,8575 |
| FAM89A     | 1811,2   | 11911,9  | 4024,07  | 11615,85 | 407,4    | 7,86     | 7340,755   | 207,63    | 7133,125  |
| MAP4K4     | 18385,31 | 14970,95 | 8851,92  | 18726,85 | 4869,01  | 11332,5  | 15233,7575 | 8100,755  | 7133,0025 |
| RPN1       | 29251,16 | 23326,22 | 26552,46 | 19798,38 | 14298,48 | 20963,37 | 24732,055  | 17630,925 | 7101,13   |
| EMILIN1    | 429,65   | 29870,41 | 390,89   | 101      | 88,94    | 1121,27  | 7697,9875  | 605,105   | 7092,8825 |
| AP2A1      | 7300,86  | 17729,18 | 12023,46 | 16216,63 | 5915,37  | 6592,46  | 13317,5325 | 6253,915  | 7063,6175 |
| SRM        | 16115,32 | 10670,51 | 15337,49 | 16183,88 | 12239,07 | 2824,84  | 14576,8    | 7531,955  | 7044,845  |
| MDK        | 796,11   | 1230,7   | 37903,22 | 324,88   | 205,76   | 5853,34  | 10063,7275 | 3029,55   | 7034,1775 |
| LAMTOR1    | 17036,29 | 6396,22  | 13012,67 | 9380,03  | 4442,42  | 4421     | 11456,3025 | 4431,71   | 7024,5925 |
| RAN        | 57741,32 | 36822,25 | 47887,59 | 32568,5  | 45414,4  | 28049,08 | 43754,915  | 36731,74  | 7023,175  |
| FP565260.1 | 4242,71  | 2462,76  | 14635,06 | 15380,87 | 2195,78  | 2155,34  | 9180,35    | 2175,56   | 7004,79   |
| SLC39A3    | 20358,62 | 18888,04 | 14628,57 | 7305,34  | 3216,54  | 13393,63 | 15295,1425 | 8305,085  | 6990,0575 |
| SSU72      | 9721,57  | 10278,53 | 20141,24 | 17352    | 9209,75  | 5567,42  | 14373,335  | 7388,585  | 6984,75   |
| PIN1       | 4785,45  | 5558,49  | 19358,93 | 14000,96 | 3416,14  | 4478,09  | 10925,9575 | 3947,115  | 6978,8425 |
| XK         | 15458,36 | 6781,58  | 4843,22  | 849,64   | 42,46    | 1,75     | 6983,2     | 22,105    | 6961,095  |
| NME4       | 14782,38 | 14182,71 | 13186,58 | 15037,54 | 11368,17 | 3309,92  | 14297,3025 | 7339,045  | 6958,2575 |
| SIGLEC6    | 1251,51  | 2891,49  | 616,9    | 27984,86 | 3,04     | 2478,15  | 8186,19    | 1240,595  | 6945,595  |
| COL23A1    | 7042,44  | 7074,65  | 12851,73 | 5652,53  | 2445,98  | 9,72     | 8155,3375  | 1227,85   | 6927,4875 |
| NME1       | 23137,57 | 15394,32 | 14187,39 | 13970,18 | 13577,59 | 5937,38  | 16672,365  | 9757,485  | 6914,88   |
| YIPF2      | 2398,43  | 3575,75  | 16948,05 | 14783,11 | 3198,33  | 1919,18  | 9426,335   | 2558,755  | 6867,58   |
| SAFB       | 16110,25 | 15797,67 | 18132,94 | 22807,17 | 12467,64 | 10251,43 | 18212,0075 | 11359,535 | 6852,4725 |

|          |          |          |           |          |           |          |            |           |           |
|----------|----------|----------|-----------|----------|-----------|----------|------------|-----------|-----------|
| AHCY     | 22370,99 | 27145,46 | 12260,16  | 22698,27 | 15783,81  | 12814,18 | 21118,72   | 14298,995 | 6819,725  |
| MINPP1   | 10869,05 | 15475,09 | 2977,27   | 13184,34 | 1032,38   | 6648,06  | 10626,4375 | 3840,22   | 6786,2175 |
| TAF15    | 10220,47 | 17942,13 | 18975,72  | 14826,09 | 6719,72   | 10700,77 | 15491,1025 | 8710,245  | 6780,8575 |
| SLC29A1  | 11796,96 | 4781,38  | 5410,32   | 23882,05 | 6341,42   | 3055,1   | 11467,6775 | 4698,26   | 6769,4175 |
| LRRCS9   | 14244,7  | 15053,31 | 10130,93  | 18305,95 | 6362,15   | 8982,03  | 14433,7225 | 7672,09   | 6761,6325 |
| CCT7     | 47598,29 | 35435,28 | 32325,85  | 40906,85 | 40249,04  | 24428,87 | 39066,5675 | 32338,955 | 6727,6125 |
| RHOG     | 12717,39 | 9372,68  | 21982,92  | 15384,82 | 12445,07  | 3849,86  | 14864,4525 | 8147,465  | 6716,9875 |
| MARCKSL1 | 8526,5   | 19183,05 | 29178,67  | 2537,66  | 7948,43   | 8363,23  | 14856,47   | 8155,83   | 6700,64   |
| PKLR     | 1278,01  | 14983,98 | 807,51    | 9715,34  | 0         | 4,04     | 6696,21    | 2,02      | 6694,19   |
| MATK     | 12712,6  | 12118,4  | 3803,8    | 1649,75  | 510,15    | 1247,97  | 7571,1375  | 879,06    | 6692,0775 |
| EHBP1L1  | 5333,27  | 17236    | 9524,81   | 14266,68 | 5243,51   | 4578,01  | 11590,19   | 4910,76   | 6679,43   |
| SERPINH1 | 13509,46 | 15316,89 | 10968,88  | 7918,21  | 4023,36   | 6508,34  | 11928,36   | 5265,85   | 6662,51   |
| MYO16    | 6037,35  | 2,81     | 11373,75  | 10387,3  | 0         | 576      | 6950,3025  | 288       | 6662,3025 |
| GMPR     | 5698,77  | 8740,62  | 9232,78   | 9144,59  | 127,37    | 2995,42  | 8204,19    | 1561,395  | 6642,795  |
| EIF4EBP1 | 12875,49 | 8930,72  | 15139,41  | 10038,11 | 8723,49   | 1538,78  | 11745,9325 | 5131,135  | 6614,7975 |
| NUDC     | 13858,21 | 10959,65 | 18174,46  | 17055,92 | 8598,33   | 8221,14  | 15012,06   | 8409,735  | 6602,325  |
| PLXND1   | 13846,6  | 4556,71  | 21799,89  | 22379,11 | 12203,69  | 5915,54  | 15645,5775 | 9059,615  | 6585,9625 |
| RPL23    | 58779,72 | 69325,53 | 107744,12 | 48415,73 | 104987,77 | 23979,24 | 71066,275  | 64483,505 | 6582,77   |
| RNF24    | 13764,84 | 8346,35  | 8998,46   | 16067,19 | 3739,45   | 6711,99  | 11794,21   | 5225,72   | 6568,49   |
| PEBP1    | 18674,14 | 16493,05 | 29151,12  | 11330,01 | 14887,84  | 9814,63  | 18912,08   | 12351,235 | 6560,845  |
| CPT1A    | 7108,73  | 15395,84 | 10606,84  | 19999,27 | 322,06    | 13130,99 | 13277,67   | 6726,525  | 6551,145  |
| PPP1R14B | 13053,85 | 16409,17 | 20509,7   | 14626,35 | 13864,31  | 5341,04  | 16149,7675 | 9602,675  | 6547,0925 |
| SF3A1    | 14112,19 | 17188,2  | 11962,18  | 16538,03 | 5921,7    | 10915,92 | 14950,15   | 8418,81   | 6531,34   |
| PSMC3    | 18418,7  | 10817,42 | 11669,84  | 22354,8  | 9518,31   | 9053,72  | 15815,19   | 9286,015  | 6529,175  |
| NHP2     | 11902,08 | 11611,24 | 11786,66  | 12842,69 | 6708,76   | 4335,06  | 12035,6675 | 5521,91   | 6513,7575 |
| JAK2     | 1667,33  | 2063,97  | 1647,86   | 29080,24 | 1167,95   | 3048,82  | 8614,85    | 2108,385  | 6506,465  |
| CCND2    | 11799,73 | 18741,65 | 18260,82  | 6,89     | 2,77      | 11404,01 | 12202,2725 | 5703,39   | 6498,8825 |
| PSMD13   | 16195,36 | 8915,76  | 16919,18  | 14166,21 | 9192,73   | 5916,8   | 14049,1275 | 7554,765  | 6494,3625 |
| VPS37B   | 8729,45  | 14712,84 | 13316,81  | 12853,56 | 3242,12   | 8613,52  | 12403,165  | 5927,82   | 6475,345  |
| ELAC2    | 9339,65  | 11918,48 | 10839,99  | 8438,31  | 5255,63   | 2067,51  | 10134,1075 | 3661,57   | 6472,5375 |
| FAM171A1 | 16367,51 | 1581,56  | 14006,32  | 10526,3  | 17,76     | 8278,63  | 10620,4225 | 4148,195  | 6472,2275 |
| NACC1    | 7221,67  | 12000,07 | 8238,37   | 17115,4  | 4983,46   | 4384,36  | 11143,8775 | 4683,91   | 6459,9675 |
| CDC42BPA | 7138,28  | 6902,89  | 10107,62  | 6549,74  | 2429,16   | 9,3      | 7674,6325  | 1219,23   | 6455,4025 |

|                 |          |          |          |          |           |          |            |           |           |
|-----------------|----------|----------|----------|----------|-----------|----------|------------|-----------|-----------|
| <b>F2RL3</b>    | 3576,77  | 4806,42  | 7902,12  | 11619,82 | 508,58    | 599,11   | 6976,2825  | 553,845   | 6422,4375 |
| <b>INTS1</b>    | 12369,79 | 18455,48 | 13219,39 | 11860,56 | 5894,86   | 9242,9   | 13976,305  | 7568,88   | 6407,425  |
| <b>HINT1</b>    | 21987,52 | 12403,98 | 21411,45 | 13177,43 | 7664,3    | 14062,71 | 17245,095  | 10863,505 | 6381,59   |
| <b>MAP3K11</b>  | 11813,39 | 9355,45  | 13235,19 | 7812,18  | 4360,54   | 3985,67  | 10554,0525 | 4173,105  | 6380,9475 |
| <b>CCND3</b>    | 15223,56 | 13930,2  | 22719,63 | 26177,03 | 12481,37  | 13784,01 | 19512,605  | 13132,69  | 6379,915  |
| <b>RPS4X</b>    | 99463,71 | 122055,7 | 99708,34 | 73389,63 | 107910,39 | 76646,21 | 98654,335  | 92278,3   | 6376,035  |
| <b>MFNG</b>     | 8471,19  | 12608,99 | 14578,63 | 14863,37 | 6699,68   | 5861,74  | 12630,545  | 6280,71   | 6349,835  |
| <b>SLC25A37</b> | 11504,98 | 7587,09  | 9845,28  | 17839,9  | 8805,15   | 1900,82  | 11694,3125 | 5352,985  | 6341,3275 |
| <b>CD82</b>     | 2275,25  | 8848,6   | 17185,13 | 25116,73 | 264,43    | 13766,03 | 13356,4275 | 7015,23   | 6341,1975 |
| <b>NOMO2</b>    | 20004,29 | 11181,03 | 24133,87 | 22036,94 | 17513,05  | 8514,5   | 19339,0325 | 13013,775 | 6325,2575 |
| <b>NBEAL2</b>   | 15670,8  | 14902,46 | 15529,16 | 14874,27 | 6800,81   | 11108,35 | 15244,1725 | 8954,58   | 6289,5925 |
| <b>ELOF1</b>    | 2702,85  | 3356,97  | 3617,5   | 23995,94 | 2817,3    | 1445,23  | 8418,315   | 2131,265  | 6287,05   |
| <b>DDX5</b>     | 30889,66 | 52561,82 | 33814,6  | 35852,97 | 28073,06  | 35926,69 | 38279,7625 | 31999,875 | 6279,8875 |
| <b>SLC16A1</b>  | 16178,9  | 9951,34  | 8947,7   | 15494,16 | 5023,74   | 7717,7   | 12643,025  | 6370,72   | 6272,305  |
| <b>ILF2</b>     | 25705,89 | 20496,47 | 22482,98 | 28574,24 | 19905,25  | 16198,72 | 24314,895  | 18051,985 | 6262,91   |
| <b>TESPA1</b>   | 11320,9  | 4720,97  | 5727,32  | 7978,29  | 23,19     | 2347,48  | 7436,87    | 1185,335  | 6251,535  |
| <b>RRP1</b>     | 8798,66  | 5719,18  | 15373,93 | 9585,09  | 4918,88   | 2334,24  | 9869,215   | 3626,56   | 6242,655  |
| <b>CDC42</b>    | 18974,32 | 16223,62 | 21508,15 | 29159,29 | 14680,63  | 15769,37 | 21466,345  | 15225     | 6241,345  |
| <b>NT5DC2</b>   | 11705,95 | 7517,58  | 3868,34  | 7883,39  | 3007,57   | 6,65     | 7743,815   | 1507,11   | 6236,705  |
| <b>WNT5B</b>    | 4446,32  | 4264,22  | 12057,6  | 4398,67  | 10,39     | 116,72   | 6291,7025  | 63,555    | 6228,1475 |
| <b>H2AZ1</b>    | 45430,46 | 29587,57 | 23884,7  | 28986,9  | 22833,56  | 28663,74 | 31972,4075 | 25748,65  | 6223,7575 |
| <b>FKBP4</b>    | 28272,03 | 15963,45 | 23115,89 | 17138,91 | 19928,76  | 9873,43  | 21122,57   | 14901,095 | 6221,475  |
| <b>PSMF1</b>    | 15482,18 | 7689,89  | 12172,42 | 11231,48 | 4127,66   | 6742,04  | 11643,9925 | 5434,85   | 6209,1425 |
| <b>EPN1</b>     | 8436,33  | 14239,17 | 15775,01 | 15394,43 | 9549,43   | 4984,83  | 13461,235  | 7267,13   | 6194,105  |
| <b>NDUFA11</b>  | 8003,86  | 8419,73  | 12924,02 | 17938,59 | 6532,61   | 4737,03  | 11821,55   | 5634,82   | 6186,73   |
| <b>ELAVL1</b>   | 13451,19 | 10676,06 | 7992,01  | 22015,04 | 6030,04   | 8674,4   | 13533,575  | 7352,22   | 6181,355  |
| <b>TOR4A</b>    | 7585,1   | 7369,97  | 11078,6  | 12511,63 | 4155,33   | 2763,86  | 9636,325   | 3459,595  | 6176,73   |
| <b>KIF13A</b>   | 4004,93  | 1244,59  | 10116,81 | 9352,96  | 29,73     | 0        | 6179,8225  | 14,865    | 6164,9575 |
| <b>CXXC5</b>    | 5311,46  | 22140,29 | 5296,84  | 11575,68 | 735,02    | 9137,85  | 11081,0675 | 4936,435  | 6144,6325 |
| <b>ATP6AP1</b>  | 9918,05  | 7922,89  | 20704,29 | 12201,7  | 7495,64   | 5599,82  | 12686,7325 | 6547,73   | 6139,0025 |
| <b>APEH</b>     | 15239,92 | 14952,33 | 20088,28 | 10218,19 | 7674,22   | 10299,5  | 15124,68   | 8986,86   | 6137,82   |
| <b>SNRPB</b>    | 46539,75 | 29038,02 | 24123,26 | 26098,35 | 28256,11  | 22409,98 | 31449,845  | 25333,045 | 6116,8    |
| <b>ISOC2</b>    | 5133,27  | 8900,78  | 14076,41 | 10615,94 | 4761,47   | 2377,98  | 9681,6     | 3569,725  | 6111,875  |

|         |          |          |           |          |          |          |            |            |           |
|---------|----------|----------|-----------|----------|----------|----------|------------|------------|-----------|
| KCNN4   | 6408,78  | 5528,72  | 18739,44  | 10220,02 | 5433,6   | 2834,97  | 10224,24   | 4134,285   | 6089,955  |
| CFP     | 9825,38  | 1564,84  | 11434,06  | 5841,38  | 705,5    | 1462,48  | 7166,415   | 1083,99    | 6082,425  |
| GARS1   | 15373,75 | 12308,14 | 19178,9   | 20012,03 | 8014,06  | 13258,01 | 16718,205  | 10636,035  | 6082,17   |
| DCAF15  | 5740,73  | 4347,03  | 18491,16  | 11844,06 | 3939,36  | 4148,18  | 10105,745  | 4043,77    | 6061,975  |
| HMGN1   | 48202,36 | 24458,02 | 37698,49  | 39792,77 | 40506,06 | 22453,03 | 37537,91   | 31479,545  | 6058,365  |
| BCL2L1  | 8043,49  | 14307,99 | 11174,72  | 14612,35 | 1422,05  | 10551,25 | 12034,6375 | 5986,65    | 6047,9875 |
| PRF1    | 5380,94  | 12529,75 | 7389,41   | 612,07   | 9,93     | 886,13   | 6478,0425  | 448,03     | 6030,0125 |
| RBM42   | 7839,03  | 7419,99  | 19116,76  | 11104,55 | 6131,2   | 4549,73  | 11370,0825 | 5340,465   | 6029,6175 |
| NR1H2   | 4051,47  | 5689,1   | 19589,74  | 9555,21  | 4917,1   | 2502,33  | 9721,38    | 3709,715   | 6011,665  |
| XPO5    | 14506,47 | 8671,71  | 12787,35  | 17554,4  | 6635,34  | 8109,4   | 13379,9825 | 7372,37    | 6007,6125 |
| NTRK1   | 4830,44  | 11275,95 | 7453,94   | 7132,7   | 6,8      | 3339,68  | 7673,2575  | 1673,24    | 6000,0175 |
| CLTC    | 25308,57 | 23091,24 | 20993,88  | 36239,56 | 29098,86 | 11728,79 | 26408,3125 | 20413,825  | 5994,4875 |
| NAPA    | 5736,88  | 6626,65  | 19425,89  | 7837,49  | 3150,75  | 4682,29  | 9906,7275  | 3916,52    | 5990,2075 |
| MFN2    | 9377,36  | 9456,48  | 11441,78  | 21629,51 | 7912,75  | 6064,18  | 12976,2825 | 6988,465   | 5987,8175 |
| ICAM1   | 705,89   | 1225,94  | 21049,72  | 2562,34  | 425,76   | 380,76   | 6385,9725  | 403,26     | 5982,7125 |
| TRA2B   | 20691,48 | 27967,92 | 13501,34  | 14873,68 | 12858,96 | 13696,7  | 19258,605  | 13277,83   | 5980,775  |
| IER2    | 9261,82  | 12213,16 | 29863,9   | 19409,18 | 14968,92 | 8452,61  | 17687,015  | 11710,765  | 5976,25   |
| TRIM58  | 8629,92  | 5367,94  | 2038,67   | 7851,56  | 0        | 19,22    | 5972,0225  | 9,61       | 5962,4125 |
| UPF1    | 14015,2  | 15314,25 | 10540,12  | 15976,88 | 5937,87  | 10109,64 | 13961,6125 | 8023,755   | 5937,8575 |
| LMAN2   | 11722,4  | 11116,89 | 15759,68  | 14700,25 | 8387,96  | 6391,16  | 13324,805  | 7389,56    | 5935,245  |
| PRDX6   | 31555,81 | 11709,73 | 22418,01  | 20883,1  | 22152,44 | 9260,63  | 21641,6625 | 15706,535  | 5935,1275 |
| NDUFV3  | 6396,74  | 4205,35  | 18811,51  | 6357,59  | 4182,66  | 1838,72  | 8942,7975  | 3010,69    | 5932,1075 |
| SLC25A3 | 31521,57 | 34840,98 | 30075,84  | 26085,37 | 34304,41 | 15108,45 | 30630,94   | 24706,43   | 5924,51   |
| PRDX1   | 16001,74 | 17334,95 | 13752,1   | 19673,5  | 10863,78 | 10668,69 | 16690,5725 | 10766,235  | 5924,3375 |
| CDC20   | 14949,23 | 8416,69  | 18012,11  | 10917,08 | 8189,67  | 6110,31  | 13073,7775 | 7149,99    | 5923,7875 |
| ITM2A   | 9069,24  | 22427,22 | 8735,77   | 8147,95  | 0,91     | 12352,38 | 12095,045  | 6176,645   | 5918,4    |
| STAT3   | 7111,22  | 14820,47 | 22552,95  | 10172,55 | 3494,51  | 12018,69 | 13664,2975 | 7756,6     | 5907,6975 |
| ATP5MG  | 15300,39 | 7907,27  | 19508,03  | 14632,75 | 10453,95 | 6425,21  | 14337,11   | 8439,58    | 5897,53   |
| NME2    | 35285,16 | 31754,75 | 45497,6   | 32484,56 | 48364,37 | 12359,16 | 36255,5175 | 30361,765  | 5893,7525 |
| DPP3    | 9533,35  | 11149,52 | 6130,89   | 7201,38  | 2404,97  | 2829,72  | 8503,785   | 2617,345   | 5886,44   |
| MT-CYB  | 109437,2 | 187694,4 | 164130,27 | 96287,11 | 88796,76 | 178239,7 | 139387,258 | 133518,215 | 5869,0425 |
| HDLBP   | 32662,33 | 16603,27 | 28643,25  | 39649,16 | 20108,39 | 26933,98 | 29389,5025 | 23521,185  | 5868,3175 |
| MUC1    | 335,06   | 6859,8   | 16073,05  | 3321,2   | 712,04   | 891,1    | 6647,2775  | 801,57     | 5845,7075 |

|          |          |          |          |          |          |          |            |           |           |
|----------|----------|----------|----------|----------|----------|----------|------------|-----------|-----------|
| DHCR24   | 19404,74 | 11891,01 | 4502,49  | 8650,57  | 10541,81 | 2,08     | 11112,2025 | 5271,945  | 5840,2575 |
| IL1B     | 8862,41  | 2042,97  | 14137,64 | 6881,01  | 2440,34  | 1863,89  | 7981,0075  | 2152,115  | 5828,8925 |
| KCNK5    | 7796,36  | 9193,23  | 10138,24 | 8048,5   | 824,74   | 5149,36  | 8794,0825  | 2987,05   | 5807,0325 |
| SSR4     | 10117,97 | 7001,26  | 18786,61 | 11550,94 | 8049,96  | 4096,35  | 11864,195  | 6073,155  | 5791,04   |
| GPAA1    | 9164,51  | 22419,5  | 8615,86  | 8364,35  | 9177,71  | 3558,38  | 12141,055  | 6368,045  | 5773,01   |
| PDXK     | 7402,67  | 8278,16  | 15975,39 | 18263,15 | 6584,63  | 6861,37  | 12479,8425 | 6723      | 5756,8425 |
| TIMM50   | 10409,81 | 8546,03  | 13921,67 | 10303,43 | 6096,27  | 3981,42  | 10795,235  | 5038,845  | 5756,39   |
| SSBP3    | 6432,04  | 8666,38  | 12882,19 | 9688,07  | 563,47   | 6758,96  | 9417,17    | 3661,215  | 5755,955  |
| ADAMTS14 | 5791,75  | 6196,99  | 13280,87 | 4143,04  | 20,19    | 3205,04  | 7353,1625  | 1612,615  | 5740,5475 |
| TPST2    | 3893,99  | 21955,85 | 4949,89  | 3930,23  | 1451,74  | 4446,77  | 8682,49    | 2949,255  | 5733,235  |
| AK3      | 2178,26  | 3365,65  | 1775,77  | 28921,1  | 1026,63  | 5649,08  | 9060,195   | 3337,855  | 5722,34   |
| ADRM1    | 12670,53 | 8990,53  | 11873,65 | 13908,4  | 5984,86  | 6300,03  | 11860,7775 | 6142,445  | 5718,3325 |
| HNRNPA3  | 51802,09 | 42794,17 | 34338,96 | 41445,91 | 53189,95 | 20567,52 | 42595,2825 | 36878,735 | 5716,5475 |
| STARD8   | 5980,47  | 6399,92  | 4452,99  | 7668,61  | 802,05   | 16,61    | 6125,4975  | 409,33    | 5716,1675 |
| CAPN15   | 5335,49  | 13145,86 | 7035,26  | 10159,52 | 4390,62  | 2022,28  | 8919,0325  | 3206,45   | 5712,5825 |
| MCM7     | 41647,82 | 44269,83 | 31861,73 | 23591,2  | 29807,4  | 29467,18 | 35342,645  | 29637,29  | 5705,355  |
| ANKLE1   | 5513,61  | 6199,23  | 3561,6   | 11684,28 | 1969,99  | 102,48   | 6739,68    | 1036,235  | 5703,445  |
| GALNT2   | 12893,17 | 20806,41 | 13545,21 | 17998,83 | 3812,97  | 17409,78 | 16310,905  | 10611,375 | 5699,53   |
| CASP3    | 4122,26  | 13010,2  | 5337,2   | 10302,3  | 1723,67  | 3264,68  | 8192,99    | 2494,175  | 5698,815  |
| PSMB2    | 16215,85 | 9553,03  | 12467,06 | 13459,13 | 6267,31  | 8196,31  | 12923,7675 | 7231,81   | 5691,9575 |
| RAB1B    | 18194,03 | 14124,9  | 17398,31 | 13824,89 | 10771,77 | 9620,24  | 15885,5325 | 10196,005 | 5689,5275 |
| CLCN4    | 12441,55 | 3968,49  | 3329,41  | 3023,98  | 15,64    | 4,54     | 5690,8575  | 10,09     | 5680,7675 |
| GRK6     | 9790,21  | 7819,31  | 7335,92  | 11084,94 | 3258,14  | 3443,25  | 9007,595   | 3350,695  | 5656,9    |
| PRPF31   | 8093,34  | 11442,78 | 12582,35 | 8460,64  | 4244,22  | 4784,13  | 10144,7775 | 4514,175  | 5630,6025 |
| PLTP     | 5654,04  | 4000,35  | 13588,68 | 18753,1  | 5983,88  | 3780,37  | 10499,0425 | 4882,125  | 5616,9175 |
| SFPQ     | 33152,46 | 36444,57 | 46868,09 | 42382,84 | 32423,55 | 35790,21 | 39711,99   | 34106,88  | 5605,11   |
| CORO1C   | 15355,36 | 17642,82 | 12520,32 | 11387,13 | 6491,62  | 10761,42 | 14226,4075 | 8626,52   | 5599,8875 |
| PUF60    | 13976,42 | 22839,91 | 12858,54 | 8761,1   | 14864,96 | 3163,09  | 14608,9925 | 9014,025  | 5594,9675 |
| ATF5     | 3220     | 6211,86  | 9712,19  | 10218,53 | 1197,61  | 2300,72  | 7340,645   | 1749,165  | 5591,48   |
| CHID1    | 8388,36  | 7210,05  | 12001,52 | 6960,28  | 3719,88  | 2380,38  | 8640,0525  | 3050,13   | 5589,9225 |
| STK40    | 5797,18  | 7763,74  | 12359,94 | 7786,64  | 1566,4   | 4115,81  | 8426,875   | 2841,105  | 5585,77   |
| CNRIP1   | 8872,37  | 12097,35 | 13811,72 | 9039,39  | 56,57    | 10706,83 | 10955,2075 | 5381,7    | 5573,5075 |
| PSIP1    | 6245,31  | 9993,71  | 7182,08  | 62600,55 | 8982,11  | 22922,62 | 21505,4125 | 15952,365 | 5553,0475 |



|                 |          |          |           |          |          |          |            |           |           |
|-----------------|----------|----------|-----------|----------|----------|----------|------------|-----------|-----------|
| <b>TMED9</b>    | 12381,36 | 10096,18 | 15730,81  | 16742,94 | 8756,91  | 7652,82  | 13737,8225 | 8204,865  | 5532,9575 |
| <b>MAT2A</b>    | 22685,61 | 29434,72 | 34340     | 20041,29 | 16758,18 | 25438,91 | 26625,405  | 21098,545 | 5526,86   |
| <b>PTGS1</b>    | 17252,94 | 25457,67 | 8843,33   | 6769,78  | 1494,39  | 16631,89 | 14580,93   | 9063,14   | 5517,79   |
| <b>NUP98</b>    | 12909,53 | 11711,67 | 18004,29  | 15928,46 | 8569,49  | 9685,25  | 14638,4875 | 9127,37   | 5511,1175 |
| <b>TXN2</b>     | 7685,34  | 16504,38 | 14554,55  | 11611,73 | 9650,15  | 4513,38  | 12589      | 7081,765  | 5507,235  |
| <b>ARFGAP1</b>  | 6635,65  | 5824,5   | 19184,97  | 12458,57 | 4906,17  | 6177,77  | 11025,9225 | 5541,97   | 5483,9525 |
| <b>FAM32A</b>   | 6247,26  | 8305,44  | 19705,31  | 15857,34 | 8345,54  | 5763,82  | 12528,8375 | 7054,68   | 5474,1575 |
| <b>PPIF</b>     | 19659,53 | 22044,4  | 11045,27  | 9692,93  | 8079,02  | 12206,14 | 15610,5325 | 10142,58  | 5467,9525 |
| <b>B2M</b>      | 56876    | 51404,9  | 129451,07 | 16171,21 | 63130,28 | 52893,7  | 63475,795  | 58011,99  | 5463,805  |
| <b>CD320</b>    | 5903,49  | 4442,85  | 13974,91  | 10411,18 | 4050,4   | 2408,15  | 8683,1075  | 3229,275  | 5453,8325 |
| <b>CMBL</b>     | 5108,3   | 11650,14 | 9226,35   | 8700,07  | 133,69   | 6304,54  | 8671,215   | 3219,115  | 5452,1    |
| <b>NASP</b>     | 22652,3  | 26041,34 | 20867,64  | 21692,59 | 16667,09 | 18066,78 | 22813,4675 | 17366,935 | 5446,5325 |
| <b>OS9</b>      | 11738,89 | 12816,35 | 31816,67  | 13769,21 | 15268,4  | 8943,18  | 17535,28   | 12105,79  | 5429,49   |
| <b>SF1</b>      | 20744,09 | 27309,71 | 30010,95  | 20112,75 | 21582,81 | 16651,12 | 24544,375  | 19116,965 | 5427,41   |
| <b>RANGAP1</b>  | 13699,07 | 14292,5  | 13635,46  | 17268,15 | 10378,88 | 8244,81  | 14723,795  | 9311,845  | 5411,95   |
| <b>HSPE1</b>    | 14850,59 | 9893,46  | 10656,62  | 13300,39 | 10604,96 | 2924,26  | 12175,265  | 6764,61   | 5410,655  |
| <b>TMEM109</b>  | 14224,71 | 10754,73 | 8650,23   | 8383,52  | 4857,94  | 5330,9   | 10503,2975 | 5094,42   | 5408,8775 |
| <b>SNAPC3</b>   | 1249,76  | 2451,86  | 1119,65   | 29967,27 | 3052,35  | 3548,2   | 8697,135   | 3300,275  | 5396,86   |
| <b>SLC38A5</b>  | 18641,43 | 382,41   | 3893,48   | 8272,29  | 3206,61  | 1611,74  | 7797,4025  | 2409,175  | 5388,2275 |
| <b>TRIM27</b>   | 9327,99  | 7238,98  | 10677,9   | 14955,6  | 6257,02  | 4069,01  | 10550,1175 | 5163,015  | 5387,1025 |
| <b>NOP58</b>    | 20355,55 | 12998,44 | 17188,59  | 15421,98 | 14199,74 | 8033,71  | 16491,14   | 11116,725 | 5374,415  |
| <b>TXLNA</b>    | 8416,49  | 8667,21  | 13265,84  | 10192,39 | 4953,6   | 4569,68  | 10135,4825 | 4761,64   | 5373,8425 |
| <b>GPR85</b>    | 11975,46 | 2214,89  | 4092,72   | 3363,85  | 71,96    | 4,38     | 5411,73    | 38,17     | 5373,56   |
| <b>SSRP1</b>    | 34978,89 | 24831,84 | 25124,02  | 29934,58 | 28052,67 | 18652,48 | 28717,3325 | 23352,575 | 5364,7575 |
| <b>ARHGEF12</b> | 4813,67  | 5364,41  | 3920,8    | 9733,94  | 1117,35  | 75,5     | 5958,205   | 596,425   | 5361,78   |
| <b>PLEC</b>     | 3571,49  | 38067,44 | 2582,34   | 13193,68 | 10769,17 | 7219,54  | 14353,7375 | 8994,355  | 5359,3825 |
| <b>APOBEC3C</b> | 11371,54 | 11904,42 | 10812,51  | 8447,91  | 4683,66  | 5869,4   | 10634,095  | 5276,53   | 5357,565  |
| <b>RAB11A</b>   | 12598,29 | 8358,22  | 20571,91  | 11218,32 | 6536,15  | 9123,31  | 13186,685  | 7829,73   | 5356,955  |
| <b>MLXIP</b>    | 6393,95  | 16222,7  | 15740,64  | 12225,74 | 4350,65  | 10234,21 | 12645,7575 | 7292,43   | 5353,3275 |
| <b>ERGIC3</b>   | 11651,26 | 12624,84 | 19826,06  | 26248,9  | 13743,98 | 10726,32 | 17587,765  | 12235,15  | 5352,615  |
| <b>PSMC4</b>    | 12246,54 | 6087,12  | 12342,67  | 11222,27 | 5713,29  | 4553,12  | 10474,65   | 5133,205  | 5341,445  |
| <b>GDF11</b>    | 2267,94  | 16283,46 | 6305,48   | 10400,56 | 2101,04  | 4872,79  | 8814,36    | 3486,915  | 5327,445  |
| <b>BMP2K</b>    | 11732,82 | 18649,87 | 6382,51   | 14725,35 | 1154,83  | 13941,01 | 12872,6375 | 7547,92   | 5324,7175 |

|          |          |          |           |          |           |          |            |            |           |
|----------|----------|----------|-----------|----------|-----------|----------|------------|------------|-----------|
| DDAH2    | 1713,48  | 3979     | 17042,88  | 5880,55  | 1959,46   | 1709,12  | 7153,9775  | 1834,29    | 5319,6875 |
| RPS8     | 115680,7 | 100130,7 | 170393,18 | 101377,2 | 193148,67 | 40008,08 | 121895,44  | 116578,375 | 5317,065  |
| JPT2     | 8492,19  | 11749,93 | 5268,42   | 10946,81 | 2672,2    | 4931,26  | 9114,3375  | 3801,73    | 5312,6075 |
| NDUFC2   | 11132,03 | 6671,51  | 13902,33  | 11120,5  | 6982,62   | 3817,37  | 10706,5925 | 5399,995   | 5306,5975 |
| MCM5     | 17233,02 | 21218,58 | 12612,98  | 16579,52 | 6843,67   | 16374,02 | 16911,025  | 11608,845  | 5302,18   |
| SNRPC    | 9997,23  | 6798,24  | 12763,24  | 8718,02  | 5523,63   | 3010,58  | 9569,1825  | 4267,105   | 5302,0775 |
| PTOV1    | 8382,33  | 13466,86 | 15546,15  | 10901,1  | 7728,14   | 5822,79  | 12074,11   | 6775,465   | 5298,645  |
| GCSAML   | 13833,3  | 6800,97  | 3218,55   | 7932,22  | 18,84     | 5297,65  | 7946,26    | 2658,245   | 5288,015  |
| POLR1A   | 8989,83  | 10477,79 | 11415,55  | 10200,51 | 3524,07   | 6450,96  | 10270,92   | 4987,515   | 5283,405  |
| DPP9     | 5667,39  | 7256,91  | 5024,53   | 15162,94 | 2810,8    | 3180,25  | 8277,9425  | 2995,525   | 5282,4175 |
| SPTA1    | 3513,67  | 3750,61  | 10727,8   | 4545,28  | 0         | 706,04   | 5634,34    | 353,02     | 5281,32   |
| QPR1     | 8481,81  | 8574,73  | 10730,75  | 5637,57  | 375       | 5812,5   | 8356,215   | 3093,75    | 5262,465  |
| UQCRCF1  | 10525,09 | 9679,78  | 19326,95  | 12140,26 | 9566,3    | 5756,66  | 12918,02   | 7661,48    | 5256,54   |
| AQP3     | 908,74   | 3689,38  | 2190,84   | 14411,95 | 62,78     | 41,33    | 5300,2275  | 52,055     | 5248,1725 |
| PCMT1    | 11064    | 8495,9   | 10163,23  | 20437,58 | 5593,24   | 8991,87  | 12540,1775 | 7292,555   | 5247,6225 |
| MLEC     | 16243,25 | 14739,12 | 19655     | 20894,42 | 8844,78   | 16436,14 | 17882,9475 | 12640,46   | 5242,4875 |
| APOC2    | 8220,92  | 9435,54  | 3939,57   | 534,02   | 345,8     | 235,92   | 5532,5125  | 290,86     | 5241,6525 |
| EPHB4    | 3857     | 5530,62  | 7418,51   | 9774,51  | 902,99    | 1919,27  | 6645,16    | 1411,13    | 5234,03   |
| ETS2     | 14902,93 | 13290,44 | 10585,01  | 22927,66 | 10352,32  | 10043,72 | 15426,51   | 10198,02   | 5228,49   |
| BLVRA    | 7675,79  | 1959,91  | 8840,98   | 10741,39 | 1770,57   | 2391,79  | 7304,5175  | 2081,18    | 5223,3375 |
| POLR2E   | 20951,11 | 17182,89 | 13353,93  | 9045,69  | 12568,91  | 7254,43  | 15133,405  | 9911,67    | 5221,735  |
| TMC6     | 10985,15 | 12563,74 | 13114,94  | 29287,89 | 15919,86  | 6617,46  | 16487,93   | 11268,66   | 5219,27   |
| TMEM14C  | 8285,88  | 5667,31  | 17318,94  | 6493,21  | 6029,82   | 2427,95  | 9441,335   | 4228,885   | 5212,45   |
| SLC39A7  | 7277,5   | 6765,5   | 13513,91  | 7069,12  | 4480,67   | 2410,63  | 8656,5075  | 3445,65    | 5210,8575 |
| ACAP1    | 2749,9   | 11703,28 | 14313,8   | 7333,44  | 2018,95   | 5618,56  | 9025,105   | 3818,755   | 5206,35   |
| RBBP4    | 24244,41 | 23109,27 | 20816,92  | 23600,04 | 12358,46  | 23116,81 | 22942,66   | 17737,635  | 5205,025  |
| CHD3     | 7513,41  | 21479,2  | 24816,65  | 17659,84 | 15583,95  | 9744,67  | 17867,275  | 12664,31   | 5202,965  |
| SLC19A1  | 8049,88  | 5117,73  | 8662,34   | 11414,72 | 3367,85   | 2852,13  | 8311,1675  | 3109,99    | 5201,1775 |
| FURIN    | 9015,61  | 16513,63 | 15772,91  | 8807,71  | 2510,66   | 12144,91 | 12527,465  | 7327,785   | 5199,68   |
| ATP6V0A1 | 3370,91  | 4519,95  | 6850,06   | 7995,7   | 699,19    | 277,78   | 5684,155   | 488,485    | 5195,67   |
| TRAP1    | 12402,93 | 17265,42 | 9789,13   | 15911,67 | 15562,78  | 1783,98  | 13842,2875 | 8673,38    | 5168,9075 |
| SNRNP200 | 28495,23 | 29167,21 | 28803,29  | 27670,71 | 13936,32  | 32802,87 | 28534,11   | 23369,595  | 5164,515  |
| EGLN2    | 6310,42  | 7776,78  | 16320,13  | 10742,67 | 5428,26   | 4844,03  | 10287,5    | 5136,145   | 5151,355  |

|           |          |          |          |          |          |          |            |           |           |
|-----------|----------|----------|----------|----------|----------|----------|------------|-----------|-----------|
| STAT5A    | 24859,62 | 29001,14 | 51888,41 | 24304,59 | 174,88   | 54550,83 | 32513,44   | 27362,855 | 5150,585  |
| PAICS     | 36495,73 | 29175,76 | 13575,69 | 30642    | 21364,23 | 23309,79 | 27472,295  | 22337,01  | 5135,285  |
| CUTA      | 8694,1   | 7705,86  | 14146,34 | 6142,19  | 5752,1   | 2327,71  | 9172,1225  | 4039,905  | 5132,2175 |
| KARS1     | 20678,62 | 15635,39 | 14339,13 | 15382,82 | 18718,31 | 4058,57  | 16508,99   | 11388,44  | 5120,55   |
| MICALL2   | 4767,04  | 8460,1   | 5052,5   | 7160,94  | 1834,1   | 656,44   | 6360,145   | 1245,27   | 5114,875  |
| RPL35     | 48577,77 | 50863,3  | 59090,16 | 43254,24 | 68670,01 | 22013,97 | 50446,3675 | 45341,99  | 5104,3775 |
| AKT1S1    | 4854,1   | 6973,69  | 12015,23 | 6992,02  | 2996,37  | 2212,78  | 7708,76    | 2604,575  | 5104,185  |
| UBAP2L    | 9674,92  | 15155,99 | 16857,02 | 19915,76 | 10031,22 | 10567,95 | 15400,9225 | 10299,585 | 5101,3375 |
| MORC3     | 5052,44  | 2649,84  | 17978,53 | 9253,57  | 5421,22  | 1853,93  | 8733,595   | 3637,575  | 5096,02   |
| CSNK2B    | 9735,01  | 8540,59  | 13298,21 | 12379,77 | 9154,43  | 2643,2   | 10988,395  | 5898,815  | 5089,58   |
| CDK4      | 21197,62 | 18976,49 | 16637,34 | 16407,48 | 10515,56 | 15923,65 | 18304,7325 | 13219,605 | 5085,1275 |
| ADSL      | 13543,15 | 13859,52 | 7680,79  | 14079,48 | 8296,33  | 6139,19  | 12290,735  | 7217,76   | 5072,975  |
| PSMG1     | 10568,01 | 4367,45  | 4985,52  | 16583,19 | 3292,61  | 4831,27  | 9126,0425  | 4061,94   | 5064,1025 |
| HNRNPA2B1 | 103762,3 | 106191,7 | 94109,43 | 78058,34 | 67493,32 | 113442,3 | 95530,4375 | 90467,785 | 5062,6525 |
| ICAM2     | 5641,9   | 6812,13  | 7929,96  | 5408,36  | 322,76   | 2471,73  | 6448,0875  | 1397,245  | 5050,8425 |
| SUPT16H   | 26693,52 | 25592,09 | 14536,65 | 23273,84 | 14425,42 | 20532,94 | 22524,025  | 17479,18  | 5044,845  |
| TIMM44    | 4739,31  | 4861,3   | 7163,64  | 13893,28 | 3097,24  | 2153,66  | 7664,3825  | 2625,45   | 5038,9325 |
| PLVAP     | 507,16   | 2367,48  | 1735,24  | 15561,56 | 0        | 13       | 5042,86    | 6,5       | 5036,36   |
| NET1      | 12446,84 | 12028,47 | 8624,35  | 23806,62 | 7962,09  | 10420,72 | 14226,57   | 9191,405  | 5035,165  |
| PRSS21    | 8610,85  | 5702,78  | 7814,21  | 0        | 1,08     | 995,44   | 5531,96    | 498,26    | 5033,7    |
| MRPL37    | 9738,17  | 10477,2  | 18868,98 | 15556,96 | 11417,49 | 5853,93  | 13660,3275 | 8635,71   | 5024,6175 |
| C1QBP     | 13470,17 | 21356,02 | 19041,08 | 16388,73 | 21729,83 | 3352,59  | 17564      | 12541,21  | 5022,79   |
| ARHGEF6   | 11635,18 | 10226,07 | 12484,87 | 24854,93 | 10285,89 | 9269,56  | 14800,2625 | 9777,725  | 5022,5375 |
| LIG1      | 10515,29 | 12844,26 | 10802,31 | 10452,77 | 5127,54  | 7137,08  | 11153,6575 | 6132,31   | 5021,3475 |
| CS        | 16736,29 | 18309,23 | 15519,99 | 15476,36 | 12977,06 | 10009,31 | 16510,4675 | 11493,185 | 5017,2825 |
| UHRF1     | 9237,11  | 14024,96 | 4964,34  | 23386,88 | 4701,97  | 11070,2  | 12903,3225 | 7886,085  | 5017,2375 |
| SYNCRIP   | 23765,58 | 23611,97 | 21458,62 | 30437,64 | 19359,61 | 20250,2  | 24818,4525 | 19804,905 | 5013,5475 |
| GTF2F1    | 6675,66  | 8607,48  | 8515,92  | 20069,12 | 6224,47  | 5691,67  | 10967,045  | 5958,07   | 5008,975  |
| ANKRD27   | 12881,12 | 12871,11 | 19850,29 | 18429,69 | 3565,72  | 18452,43 | 16008,0525 | 11009,075 | 4998,9775 |
| CHERP     | 9246,78  | 10455,29 | 12230,19 | 12878,93 | 6067,91  | 6348,21  | 11202,7975 | 6208,06   | 4994,7375 |
| LEPR      | 5307,73  | 5192,71  | 3639,15  | 11216,2  | 224,09   | 2477,18  | 6338,9475  | 1350,635  | 4988,3125 |
| SART1     | 13939,87 | 8862,68  | 10872,21 | 11115,96 | 8291,73  | 4132,45  | 11197,68   | 6212,09   | 4985,59   |
| NOSIP     | 7485,36  | 6733,94  | 12508,44 | 8289,02  | 4101,48  | 3440     | 8754,19    | 3770,74   | 4983,45   |

|                 |          |          |          |          |          |          |            |           |           |
|-----------------|----------|----------|----------|----------|----------|----------|------------|-----------|-----------|
| <b>DDX54</b>    | 12751,56 | 13890,6  | 13863,22 | 12714,87 | 11763,37 | 4889,69  | 13305,0625 | 8326,53   | 4978,5325 |
| <b>EIF5B</b>    | 26423,99 | 19565,58 | 33021,81 | 26773,83 | 30514,07 | 12463,18 | 26446,3025 | 21488,625 | 4957,6775 |
| <b>PPP1R14A</b> | 2277,84  | 2890,11  | 12110,75 | 2485,18  | 0        | 0,93     | 4940,97    | 0,465     | 4940,505  |
| <b>PSMA7</b>    | 23840,39 | 15685,59 | 21882,9  | 24750,76 | 16298,58 | 16924,36 | 21539,91   | 16611,47  | 4928,44   |
| <b>PMPCA</b>    | 7504,82  | 11607,81 | 9901     | 9019,43  | 5108,21  | 4072,3   | 9508,265   | 4590,255  | 4918,01   |
| <b>TCOF1</b>    | 15672,54 | 14586,2  | 9943,57  | 11870,63 | 10511,14 | 5708,64  | 13018,235  | 8109,89   | 4908,345  |
| <b>LASP1</b>    | 11913,2  | 17474,73 | 15945,52 | 20886,52 | 14061,95 | 9256,13  | 16554,9925 | 11659,04  | 4895,9525 |
| <b>WDR46</b>    | 7147,77  | 6834,54  | 10026,39 | 7968,98  | 4637,66  | 1575,17  | 7994,42    | 3106,415  | 4888,005  |
| <b>MRPS34</b>   | 10859,7  | 9402,47  | 10081,47 | 9469,88  | 8894,1   | 1267,75  | 9953,38    | 5080,925  | 4872,455  |
| <b>SF3B5</b>    | 6455,42  | 8034,55  | 9927,95  | 11711,51 | 4354,07  | 3990,69  | 9032,3575  | 4172,38   | 4859,9775 |
| <b>IPO4</b>     | 8890,74  | 13833,93 | 5359,15  | 8850,28  | 5962,36  | 2792,21  | 9233,525   | 4377,285  | 4856,24   |
| <b>TRIO</b>     | 4741,34  | 3317,5   | 13922,14 | 3110,51  | 2829,81  | 10,01    | 6272,8725  | 1419,91   | 4852,9625 |
| <b>EIF3A</b>    | 24646,89 | 39774,31 | 19585,7  | 29707,48 | 22862,46 | 24289,72 | 28428,595  | 23576,09  | 4852,505  |
| <b>FAH</b>      | 6888,01  | 2597,85  | 8555,15  | 6334,73  | 1277,41  | 1217,83  | 6093,935   | 1247,62   | 4846,315  |
| <b>CAPZB</b>    | 18529,98 | 12927,26 | 25126,5  | 22159,74 | 17453,86 | 12232,94 | 19685,87   | 14843,4   | 4842,47   |
| <b>PYCR2</b>    | 19763,72 | 7555,66  | 10979,06 | 8317,3   | 8490,07  | 5147,9   | 11653,935  | 6818,985  | 4834,95   |
| <b>FAM234A</b>  | 5522,63  | 7101,68  | 12827,31 | 4501,74  | 2566,32  | 2748,49  | 7488,34    | 2657,405  | 4830,935  |
| <b>SND1</b>     | 20883,69 | 20954,21 | 30333,09 | 20656,67 | 22892,47 | 13905,96 | 23206,915  | 18399,215 | 4807,7    |
| <b>GMFG</b>     | 9085,03  | 8034,97  | 41406,73 | 14654,42 | 17185,83 | 9791,03  | 18295,2875 | 13488,43  | 4806,8575 |
| <b>GALNT10</b>  | 9543,76  | 2985,75  | 6423,13  | 12891,18 | 655,48   | 5659,22  | 7960,955   | 3157,35   | 4803,605  |
| <b>SCAF1</b>    | 7197,6   | 13699,69 | 12658,13 | 9584,46  | 5421,65  | 6562,18  | 10784,97   | 5991,915  | 4793,055  |
| <b>SHKBP1</b>   | 6219,1   | 7543,58  | 20764,41 | 11684,92 | 7110,01  | 6412,74  | 11553,0025 | 6761,375  | 4791,6275 |
| <b>GRWD1</b>    | 7987,86  | 7062,05  | 6532,84  | 7391,27  | 2763,09  | 2144,14  | 7243,505   | 2453,615  | 4789,89   |
| <b>ERP29</b>    | 11249,69 | 15191,14 | 18132,7  | 8076,96  | 12361,98 | 4388,73  | 13162,6225 | 8375,355  | 4787,2675 |
| <b>PARK7</b>    | 22108    | 15352,16 | 23742,55 | 19059,14 | 20224,48 | 10359,17 | 20065,4625 | 15291,825 | 4773,6375 |
| <b>NUP153</b>   | 10166,07 | 12220,27 | 7608,82  | 11476,52 | 5160,43  | 6029,05  | 10367,92   | 5594,74   | 4773,18   |
| <b>THRAP3</b>   | 17902,86 | 18540,48 | 18131,64 | 14501,17 | 11444,7  | 13605,35 | 17269,0375 | 12525,025 | 4744,0125 |
| <b>ECPAS</b>    | 12544,19 | 9971,58  | 14706,72 | 10880,54 | 11959,66 | 2617,65  | 12025,7575 | 7288,655  | 4737,1025 |
| <b>RNF10</b>    | 11034,75 | 11988,78 | 22731,75 | 14976,92 | 10134,98 | 10757,79 | 15183,05   | 10446,385 | 4736,665  |
| <b>TRMT1</b>    | 6270,99  | 6511,21  | 8260,96  | 9847,16  | 4353,49  | 1625,44  | 7722,58    | 2989,465  | 4733,115  |
| <b>RIN3</b>     | 7389,04  | 13140,74 | 4073,68  | 6886,12  | 1896,6   | 4421,63  | 7872,395   | 3159,115  | 4713,28   |
| <b>HSPA9</b>    | 45938,42 | 32894,37 | 17475,34 | 28659,22 | 27965,68 | 25099,48 | 31241,8375 | 26532,58  | 4709,2575 |
| <b>ZNF266</b>   | 2939,71  | 2358,88  | 11721,25 | 11583,9  | 2640,15  | 2259,03  | 7150,935   | 2449,59   | 4701,345  |

|                |          |          |          |          |          |          |            |           |           |
|----------------|----------|----------|----------|----------|----------|----------|------------|-----------|-----------|
| <b>FAM118A</b> | 3068,29  | 3897,14  | 11433,35 | 9186,87  | 1183,33  | 3227,3   | 6896,4125  | 2205,315  | 4691,0975 |
| <b>USP22</b>   | 17457,09 | 22989,39 | 20607,64 | 15689,84 | 15123,11 | 13877,7  | 19185,99   | 14500,405 | 4685,585  |
| <b>CHD7</b>    | 9803,63  | 7179,84  | 7750,97  | 6073,05  | 4321,71  | 1717,37  | 7701,8725  | 3019,54   | 4682,3325 |
| <b>EIF6</b>    | 9074,53  | 8765,82  | 14052,67 | 19600,01 | 9574,27  | 6808,54  | 12873,2575 | 8191,405  | 4681,8525 |
| <b>ENSA</b>    | 18350,49 | 18881,45 | 26259,47 | 18310,87 | 18566,94 | 12973,42 | 20450,57   | 15770,18  | 4680,39   |
| <b>ARGLU1</b>  | 9999,14  | 9232,46  | 13345,93 | 5758,41  | 4839,16  | 4971,98  | 9583,985   | 4905,57   | 4678,415  |
| <b>NFATC3</b>  | 11001,11 | 13737,57 | 8899,99  | 9837,63  | 7118,07  | 5267,74  | 10869,075  | 6192,905  | 4676,17   |
| <b>THBS1</b>   | 15280,86 | 179,81   | 3206,44  | 62,87    | 12,62    | 20,34    | 4682,495   | 16,48     | 4666,015  |
| <b>LRP5</b>    | 5692,52  | 6471,76  | 11283,6  | 7532,79  | 1686,66  | 4483,33  | 7745,1675  | 3084,995  | 4660,1725 |
| <b>SH3GL1</b>  | 4130,88  | 5493,27  | 5131,99  | 18170,08 | 3521,05  | 3640,61  | 8231,555   | 3580,83   | 4650,725  |
| <b>PTK2</b>    | 3439,15  | 11862,23 | 2968,55  | 3088,71  | 1366,06  | 12,03    | 5339,66    | 689,045   | 4650,615  |
| <b>ATF6B</b>   | 7372,2   | 9657,31  | 13681,74 | 8123,91  | 6937,95  | 3179,69  | 9708,79    | 5058,82   | 4649,97   |
| <b>NCLN</b>    | 14894,16 | 14914,89 | 7387,02  | 7559,03  | 7935,27  | 5147,85  | 11188,775  | 6541,56   | 4647,215  |
| <b>CHAF1A</b>  | 7459,64  | 9460,51  | 5674,19  | 19501,65 | 4719,59  | 7042,71  | 10523,9975 | 5881,15   | 4642,8475 |
| <b>SLC39A4</b> | 4193,03  | 8434,91  | 4821,91  | 2290,26  | 332,2    | 275,4    | 4935,0275  | 303,8     | 4631,2275 |
| <b>NADK</b>    | 7688,31  | 9324,89  | 10112,69 | 10029,29 | 4238,98  | 5085,39  | 9288,795   | 4662,185  | 4626,61   |
| <b>TLNRD1</b>  | 2770,27  | 9395,4   | 8048,15  | 8365,84  | 1019,86  | 4041,37  | 7144,915   | 2530,615  | 4614,3    |
| <b>TMED3</b>   | 8595,15  | 7272,18  | 15376,02 | 7802,55  | 6558,83  | 3743,95  | 9761,475   | 5151,39   | 4610,085  |
| <b>CHST2</b>   | 9401,6   | 1820,24  | 9745,2   | 5276,76  | 1663,94  | 2250,06  | 6560,95    | 1957      | 4603,95   |
| <b>AP2B1</b>   | 15385,91 | 18562,6  | 17655,01 | 22524,63 | 13390,31 | 14467,46 | 18532,0375 | 13928,885 | 4603,1525 |
| <b>URB1</b>    | 7275,72  | 7648,33  | 5750,51  | 9964,97  | 3213,16  | 2905,42  | 7659,8825  | 3059,29   | 4600,5925 |
| <b>PBX2</b>    | 8418,66  | 8858,3   | 11292,57 | 10357,71 | 5756,94  | 4523,71  | 9731,81    | 5140,325  | 4591,485  |
| <b>PTGER3</b>  | 2152,9   | 2415,4   | 9605,88  | 14038,68 | 4931,96  | 4,4      | 7053,215   | 2468,18   | 4585,035  |
| <b>CDK11B</b>  | 9564,65  | 5528,92  | 13633,96 | 8337,72  | 4085,56  | 5289,88  | 9266,3125  | 4687,72   | 4578,5925 |
| <b>ARL2</b>    | 7147,38  | 5408,43  | 12674,69 | 7691,42  | 4395,24  | 2911,03  | 8230,48    | 3653,135  | 4577,345  |
| <b>DYRK1A</b>  | 8230,8   | 4690,07  | 22298,4  | 10175,32 | 5958,56  | 7585,85  | 11348,6475 | 6772,205  | 4576,4425 |
| <b>PSMB4</b>   | 23783,32 | 14893,08 | 21679,68 | 24569,74 | 25006,07 | 8316,05  | 21231,455  | 16661,06  | 4570,395  |
| <b>CLPTM1</b>  | 6977,52  | 6847     | 15982,89 | 10519,21 | 6990,31  | 4041,62  | 10081,655  | 5515,965  | 4565,69   |
| <b>TRMT112</b> | 12992,49 | 8317,58  | 13129,95 | 12108,78 | 10491,1  | 3655,98  | 11637,2    | 7073,54   | 4563,66   |
| <b>UBE2L6</b>  | 5596,55  | 6163,44  | 13227,96 | 6777,09  | 795,13   | 5974,61  | 7941,26    | 3384,87   | 4556,39   |
| <b>ATP13A2</b> | 9220,74  | 5576,1   | 9390,25  | 7175,87  | 1640,88  | 4936,35  | 7840,74    | 3288,615  | 4552,125  |
| <b>IRAK1</b>   | 15006,37 | 15658,3  | 15379,66 | 27638,54 | 14145,13 | 13600,16 | 18420,7175 | 13872,645 | 4548,0725 |
| <b>PDCD11</b>  | 12624,14 | 13215,92 | 8599,84  | 9707,69  | 6113     | 6888,75  | 11036,8975 | 6500,875  | 4536,0225 |



|         |          |          |          |          |          |          |            |           |           |
|---------|----------|----------|----------|----------|----------|----------|------------|-----------|-----------|
| MYDGF   | 7456,57  | 5954,58  | 13101,24 | 13202,76 | 8249,86  | 2537,31  | 9928,7875  | 5393,585  | 4535,2025 |
| PTP4A2  | 18504,32 | 17638,16 | 16253,31 | 22613,29 | 16567,81 | 11886,89 | 18752,27   | 14227,35  | 4524,92   |
| GOLIM4  | 6066,3   | 7818,24  | 2995,78  | 5246,85  | 1919,09  | 95,88    | 5531,7925  | 1007,485  | 4524,3075 |
| PRDX4   | 14798,52 | 5029,27  | 5749,72  | 5036,38  | 2295,88  | 3969,55  | 7653,4725  | 3132,715  | 4520,7575 |
| FHL2    | 5723,38  | 8273,82  | 3616,63  | 6353,5   | 83,84    | 2870,72  | 5991,8325  | 1477,28   | 4514,5525 |
| HSPBP1  | 5740,38  | 10017,25 | 8373,31  | 6618,55  | 3972,52  | 2383,43  | 7687,3725  | 3177,975  | 4509,3975 |
| PDIA4   | 23350,22 | 13515,32 | 17370,76 | 11404,9  | 13853,23 | 9954,39  | 16410,3    | 11903,81  | 4506,49   |
| IFRD2   | 12398,61 | 9748,52  | 7810,4   | 7022,83  | 6910,34  | 2576,99  | 9245,09    | 4743,665  | 4501,425  |
| BACE2   | 291,11   | 1734,49  | 23390,19 | 18,39    | 1,14     | 3737,69  | 6358,545   | 1869,415  | 4489,13   |
| APOL4   | 1254,33  | 8944,4   | 1266,85  | 6483,81  | 0        | 0        | 4487,3475  | 0         | 4487,3475 |
| TMED1   | 3334,9   | 2942,88  | 11696,44 | 8405,06  | 3025,66  | 1190,08  | 6594,82    | 2107,87   | 4486,95   |
| AFDN    | 106,82   | 102,26   | 21,01    | 22229,96 | 2267,06  | 1,35     | 5615,0125  | 1134,205  | 4480,8075 |
| MAF1    | 7090,8   | 21886,37 | 9556,84  | 6239,51  | 11463,7  | 1995,94  | 11193,38   | 6729,82   | 4463,56   |
| TSC22D1 | 6626,38  | 8025,46  | 7223,36  | 3826,59  | 7,89     | 3922,48  | 6425,4475  | 1965,185  | 4460,2625 |
| AMMECR1 | 9075,73  | 4920,08  | 7350,51  | 3892,39  | 1452,51  | 2275,77  | 6309,6775  | 1864,14   | 4445,5375 |
| YWHAG   | 25095,97 | 22617,6  | 19334,29 | 21147,56 | 18553,56 | 16665,3  | 22048,855  | 17609,43  | 4439,425  |
| KLHDC3  | 12607,09 | 14657,1  | 19564,16 | 21733,83 | 8888,96  | 16523,9  | 17140,545  | 12706,43  | 4434,115  |
| UBE2S   | 15358,37 | 25204,68 | 15523,85 | 18012,67 | 15506,17 | 12683,35 | 18524,8925 | 14094,76  | 4430,1325 |
| NDUFB11 | 16646,42 | 7841,61  | 12232,74 | 6726,58  | 8799,05  | 4066,46  | 10861,8375 | 6432,755  | 4429,0825 |
| CCAR2   | 11175,99 | 14121,65 | 8628,5   | 9246,26  | 7293,38  | 5442,04  | 10793,1    | 6367,71   | 4425,39   |
| PRMT2   | 4962,77  | 4678,68  | 16848,61 | 7783,11  | 4489,73  | 3803     | 8568,2925  | 4146,365  | 4421,9275 |
| SCAF4   | 8772,86  | 5251,49  | 14252,5  | 7168,27  | 3863,75  | 5018,41  | 8861,28    | 4441,08   | 4420,2    |
| ELOVL1  | 6501,63  | 3605,12  | 15816,11 | 6479,46  | 3740,42  | 3630,74  | 8100,58    | 3685,58   | 4415      |
| SSR1    | 13149,25 | 11027,56 | 12297,18 | 16712,33 | 10452,65 | 7312,54  | 13296,58   | 8882,595  | 4413,985  |
| GTPBP4  | 10516,44 | 9169,22  | 14433,12 | 10769,84 | 7922,11  | 5699,76  | 11222,155  | 6810,935  | 4411,22   |
| SZRD1   | 11463,62 | 13767,64 | 13066,85 | 14004,18 | 8584,34  | 8758,44  | 13075,5725 | 8671,39   | 4404,1825 |
| HDAC2   | 18308,9  | 13244,21 | 19182,33 | 27108,6  | 11295,56 | 18843,1  | 19461,01   | 15069,33  | 4391,68   |
| UQCRH   | 25188,77 | 18538,9  | 33865,47 | 26746,3  | 34929,11 | 8463,91  | 26084,86   | 21696,51  | 4388,35   |
| DHRS3   | 3565,34  | 3504,66  | 10868,87 | 2681,33  | 264,99   | 1275,07  | 5155,05    | 770,03    | 4385,02   |
| CYB5R3  | 11828,17 | 10505,19 | 13635,82 | 6536,74  | 5595,18  | 6899,97  | 10626,48   | 6247,575  | 4378,905  |
| PNP     | 10105,17 | 8569,66  | 7685,01  | 11443,32 | 6170,17  | 3976,03  | 9450,79    | 5073,1    | 4377,69   |
| PRKCB   | 8352,12  | 18025,43 | 7100     | 39083,04 | 14625,01 | 12902,22 | 18140,1475 | 13763,615 | 4376,5325 |
| CSTB    | 7636,82  | 3142,35  | 15226,02 | 7113,72  | 5666,37  | 2144,07  | 8279,7275  | 3905,22   | 4374,5075 |

|          |          |          |          |          |          |          |            |           |           |
|----------|----------|----------|----------|----------|----------|----------|------------|-----------|-----------|
| ATP5MC3  | 20008,87 | 16350,23 | 16081,53 | 14974,73 | 20537,41 | 4423     | 16853,84   | 12480,205 | 4373,635  |
| BOP1     | 14209,52 | 26887,77 | 9260,33  | 10642,8  | 20205,76 | 1547,24  | 15250,105  | 10876,5   | 4373,605  |
| CDK16    | 14957,75 | 5655,78  | 5576     | 6729,56  | 4341,79  | 3407,68  | 8229,7725  | 3874,735  | 4355,0375 |
| C19orf53 | 3974,35  | 4757,24  | 18118,55 | 6318,67  | 5829,44  | 2070,38  | 8292,2025  | 3949,91   | 4342,2925 |
| TWF2     | 8921,39  | 8151,71  | 8239,72  | 7339,17  | 4690,1   | 2952,89  | 8162,9975  | 3821,495  | 4341,5025 |
| RPL10A   | 71609,84 | 72900,12 | 73916,43 | 50738,61 | 99771,36 | 26128,65 | 67291,25   | 62950,005 | 4341,245  |
| PEAR1    | 3994,3   | 1160,17  | 2336,5   | 10121,47 | 40,93    | 125,65   | 4403,11    | 83,29     | 4319,82   |
| TPSAB1   | 871,7    | 15450,73 | 643,85   | 2765,17  | 23,88    | 1210,74  | 4932,8625  | 617,31    | 4315,5525 |
| MDN1     | 27050,56 | 11750,18 | 28189,1  | 18764,59 | 27962,01 | 6285,26  | 21438,6075 | 17123,635 | 4314,9725 |
| TK1      | 16215    | 12089,48 | 13574,16 | 11590,67 | 8369,47  | 9735,81  | 13367,3275 | 9052,64   | 4314,6875 |
| PPP1R26  | 4137,55  | 5951,98  | 1951,49  | 6770,49  | 800,98   | 0        | 4702,8775  | 400,49    | 4302,3875 |
| PUM3     | 7803,4   | 4430,78  | 4199,63  | 19721,93 | 7429,19  | 2045,14  | 9038,935   | 4737,165  | 4301,77   |
| NDUFV1   | 16257,36 | 13070,65 | 14503,34 | 18177,62 | 14276,22 | 8133,77  | 15502,2425 | 11204,995 | 4297,2475 |
| PSAT1    | 4038,92  | 1047,68  | 5781,09  | 8296,1   | 977,31   | 14,32    | 4790,9475  | 495,815   | 4295,1325 |
| KANK2    | 1643,12  | 3147,88  | 9698,57  | 10069,07 | 1734,68  | 1957,51  | 6139,66    | 1846,095  | 4293,565  |
| NR2F2    | 48       | 4632,65  | 0        | 12695,73 | 97,96    | 9,34     | 4344,095   | 53,65     | 4290,445  |
| MGAT1    | 8666,67  | 8986,25  | 9052,26  | 13479,42 | 6995,32  | 4517,23  | 10046,15   | 5756,275  | 4289,875  |
| PNPLA6   | 3033,07  | 5855,52  | 7866,33  | 18523,46 | 6660,69  | 2403,31  | 8819,595   | 4532      | 4287,595  |
| TNIP1    | 5738,57  | 15257,42 | 6901,79  | 9812,74  | 7259,43  | 3035,66  | 9427,63    | 5147,545  | 4280,085  |
| DDX39A   | 15770,47 | 15158,72 | 13671,83 | 24446,43 | 16194,39 | 9798,46  | 17261,8625 | 12996,425 | 4265,4375 |
| SHFL     | 913,47   | 1157,95  | 13092,32 | 6136,28  | 647,45   | 1475,92  | 5325,005   | 1061,685  | 4263,32   |
| BSDC1    | 2633,19  | 4578,27  | 8669,6   | 10142,71 | 1950,2   | 2541,9   | 6505,9425  | 2246,05   | 4259,8925 |
| UBE2J2   | 7030,04  | 6602,04  | 8500,2   | 9636,3   | 4215,94  | 3165,74  | 7942,145   | 3690,84   | 4251,305  |
| NADSYN1  | 5542,19  | 7339,92  | 8211,38  | 7903,02  | 3114,56  | 2883,42  | 7249,1275  | 2998,99   | 4250,1375 |
| XRCC6    | 50661,16 | 38772,57 | 33330,24 | 36629,74 | 39716,88 | 31483,27 | 39848,4275 | 35600,075 | 4248,3525 |
| BST2     | 1078,33  | 19695,67 | 17421,03 | 14038,29 | 15945,08 | 1679,09  | 13058,33   | 8812,085  | 4246,245  |
| TRIM6    | 6623,36  | 4775,73  | 1375,45  | 7434,67  | 0        | 1618,48  | 5052,3025  | 809,24    | 4243,0625 |
| MED25    | 5688,08  | 9491,44  | 9597,28  | 9262,78  | 3819,62  | 4723     | 8509,895   | 4271,31   | 4238,585  |
| POM121   | 12716,36 | 17056,23 | 15119,62 | 11545,81 | 7159,43  | 12591,98 | 14109,505  | 9875,705  | 4233,8    |
| WASH6P   | 10582,54 | 5068,46  | 11037,28 | 10850,61 | 6875,27  | 3434,95  | 9384,7225  | 5155,11   | 4229,6125 |
| GATAD2A  | 9443,27  | 13083,84 | 7141,49  | 12345,81 | 3234,16  | 9314,2   | 10503,6025 | 6274,18   | 4229,4225 |
| CPOX     | 9119,3   | 7458,9   | 3944,39  | 10394,55 | 3549,51  | 3451,16  | 7729,285   | 3500,335  | 4228,95   |
| RASAL3   | 5092,55  | 4787,95  | 9317,92  | 7811,49  | 1669,19  | 3384,01  | 6752,4775  | 2526,6    | 4225,8775 |

|          |          |          |          |          |          |          |            |          |           |
|----------|----------|----------|----------|----------|----------|----------|------------|----------|-----------|
| ZYX      | 17406,71 | 10389,08 | 17071,98 | 9772,44  | 13250,71 | 5618,62  | 13660,0525 | 9434,665 | 4225,3875 |
| TMEM164  | 11729,74 | 9865,25  | 5133,45  | 8341     | 2952,27  | 6132,77  | 8767,36    | 4542,52  | 4224,84   |
| DCTPP1   | 9893,96  | 8894,85  | 6712,82  | 10481,95 | 3753,29  | 5792,8   | 8995,895   | 4773,045 | 4222,85   |
| CRISP3   | 37,11    | 11957,68 | 4806,06  | 68,96    | 0        | 11,31    | 4217,4525  | 5,655    | 4211,7975 |
| ANXA1    | 8983,41  | 5201,75  | 17056,44 | 4548,57  | 2495,43  | 6977,47  | 8947,5425  | 4736,45  | 4211,0925 |
| SOCS3    | 172,49   | 326,04   | 15012,02 | 1841,29  | 126,03   | 144,93   | 4337,96    | 135,48   | 4202,48   |
| TBL3     | 9038,8   | 6088,2   | 4729,11  | 6866,73  | 4031,47  | 943,12   | 6680,71    | 2487,295 | 4193,415  |
| AGPAT1   | 4927,18  | 8983,38  | 6696,47  | 9269,97  | 2832,02  | 3723,44  | 7469,25    | 3277,73  | 4191,52   |
| PDCD5    | 6158,22  | 3461,97  | 13542,35 | 8211,9   | 5077,49  | 2234,26  | 7843,61    | 3655,875 | 4187,735  |
| NDUFB7   | 5862,26  | 5613,82  | 9572,51  | 10668,25 | 4766     | 2719,28  | 7929,21    | 3742,64  | 4186,57   |
| PSMD1    | 19511,81 | 7686,45  | 8901,02  | 12926,15 | 5733,5   | 10430,25 | 12256,3575 | 8081,875 | 4174,4825 |
| HPSE2    | 6441,68  | 4890,92  | 2466,8   | 3005,77  | 7,9      | 46,6     | 4201,2925  | 27,25    | 4174,0425 |
| CLU      | 1299,12  | 4218,95  | 6504,54  | 10112,67 | 127,94   | 2600,07  | 5533,82    | 1364,005 | 4169,815  |
| F11R     | 1742,74  | 6814,99  | 7161,44  | 6739,16  | 790,72   | 2099,33  | 5614,5825  | 1445,025 | 4169,5575 |
| SLC2A3   | 27994,53 | 31153,43 | 12362,26 | 16181,09 | 31527,11 | 3980,83  | 21922,8275 | 17753,97 | 4168,8575 |
| POLR2L   | 6142,74  | 6335,19  | 10625,65 | 6884,7   | 5088,05  | 1569,49  | 7497,07    | 3328,77  | 4168,3    |
| IMP4     | 8893,5   | 10010,53 | 7310,49  | 10440,1  | 6536,04  | 3458,75  | 9163,655   | 4997,395 | 4166,26   |
| TAPBP    | 5413,81  | 8449,44  | 13706,03 | 7957,86  | 5270,38  | 4164,6   | 8881,785   | 4717,49  | 4164,295  |
| CMIP     | 8139,32  | 14890,91 | 10092,72 | 13623,12 | 5754,72  | 9313,68  | 11686,5175 | 7534,2   | 4152,3175 |
| SLC52A2  | 4651,83  | 10209,25 | 5546,11  | 5257,84  | 3352,22  | 1186,72  | 6416,2575  | 2269,47  | 4146,7875 |
| SNU13    | 14945,55 | 11666,98 | 10029,73 | 12504,79 | 12119,53 | 4161,03  | 12286,7625 | 8140,28  | 4146,4825 |
| EZH2     | 7923,8   | 7138,4   | 5617,14  | 4910,15  | 4391,54  | 112,41   | 6397,3725  | 2251,975 | 4145,3975 |
| SLC25A39 | 11133,3  | 7541,35  | 12236,64 | 11923,93 | 7311,6   | 5817,61  | 10708,805  | 6564,605 | 4144,2    |
| KDM5C    | 19540,91 | 23440,82 | 10779,21 | 10718,39 | 7496,96  | 16456,16 | 16119,8325 | 11976,56 | 4143,2725 |
| MRTO4    | 9688,88  | 8027,76  | 9286,96  | 8776,6   | 6888,82  | 2719,3   | 8945,05    | 4804,06  | 4140,99   |
| HEXA     | 5061,2   | 6638,05  | 19899,54 | 4643,89  | 6022,64  | 3823,85  | 9060,67    | 4923,245 | 4137,425  |
| ECSIT    | 2796,08  | 3765,69  | 3935,97  | 19051,08 | 4550,73  | 1958,83  | 7387,205   | 3254,78  | 4132,425  |
| MT-ND6   | 30716,07 | 46719,75 | 43633,94 | 27212,06 | 40807,18 | 25072,22 | 37070,455  | 32939,7  | 4130,755  |
| CD52     | 534,78   | 2533,1   | 14048,45 | 2855,01  | 0        | 1748,49  | 4992,835   | 874,245  | 4118,59   |
| SIPA1    | 11628,28 | 4524,9   | 10122,79 | 8014,07  | 7495,68  | 1415,24  | 8572,51    | 4455,46  | 4117,05   |
| PDLIM7   | 5694,23  | 5935,61  | 10917,89 | 10951,91 | 6218,08  | 2309,88  | 8374,91    | 4263,98  | 4110,93   |
| LYAR     | 6852,58  | 6270,22  | 14101,34 | 5597,66  | 5830,55  | 2360,76  | 8205,45    | 4095,655 | 4109,795  |
| ATP5PF   | 9665,56  | 5349,34  | 16764,72 | 6766,45  | 7684,12  | 3372,72  | 9636,5175  | 5528,42  | 4108,0975 |

|                |          |          |          |          |          |          |            |           |           |
|----------------|----------|----------|----------|----------|----------|----------|------------|-----------|-----------|
| <b>DDX1</b>    | 18382,91 | 13409,63 | 12776,73 | 7027,95  | 10462,87 | 7129,52  | 12899,305  | 8796,195  | 4103,11   |
| <b>CSNK1D</b>  | 11872,25 | 12132,91 | 15888,64 | 12589,55 | 8366,16  | 9679,29  | 13120,8375 | 9022,725  | 4098,1125 |
| <b>RNF5</b>    | 4214,63  | 6964,13  | 9848,05  | 8532,4   | 4335,1   | 2275,4   | 7389,8025  | 3305,25   | 4084,5525 |
| <b>U2AF1L5</b> | 21150,89 | 3924,96  | 12442,33 | 8687,08  | 4383,99  | 10553,02 | 11551,315  | 7468,505  | 4082,81   |
| <b>GLYR1</b>   | 9141,54  | 9516,5   | 5908,37  | 9155,74  | 5442,19  | 3279,27  | 8430,5375  | 4360,73   | 4069,8075 |
| <b>GTF3C1</b>  | 13267,7  | 10633,29 | 13634,65 | 10632,65 | 11690,96 | 4254,15  | 12042,0725 | 7972,555  | 4069,5175 |
| <b>MAGI1</b>   | 5479,88  | 6129,16  | 2319,23  | 2339,07  | 2,93     | 6,13     | 4066,835   | 4,53      | 4062,305  |
| <b>PEPD</b>    | 4774,58  | 3451,73  | 11745,95 | 4446,8   | 1201,66  | 2890,9   | 6104,765   | 2046,28   | 4058,485  |
| <b>SPATC1L</b> | 4838,34  | 26,92    | 9835,26  | 6331,64  | 1671,17  | 729,54   | 5258,04    | 1200,355  | 4057,685  |
| <b>RPA2</b>    | 10090,53 | 6952,55  | 10027,43 | 9729,15  | 5454,76  | 4835,76  | 9199,915   | 5145,26   | 4054,655  |
| <b>RAB11B</b>  | 6303,64  | 7308,35  | 11276,04 | 12681,25 | 6236,67  | 4441,84  | 9392,32    | 5339,255  | 4053,065  |
| <b>PLAGL1</b>  | 4598,49  | 4658,77  | 1587,33  | 9410,29  | 1097,64  | 928,85   | 5063,72    | 1013,245  | 4050,475  |
| <b>GFUS</b>    | 2701,9   | 13662,34 | 4597,87  | 5864,41  | 4230,99  | 1088,85  | 6706,63    | 2659,92   | 4046,71   |
| <b>ENPP3</b>   | 1331,26  | 40,7     | 6909,33  | 8300,25  | 3,94     | 206,63   | 4145,385   | 105,285   | 4040,1    |
| <b>RUNX1</b>   | 9894,25  | 14348,41 | 12527,48 | 18613,31 | 2541,16  | 17081,02 | 13845,8625 | 9811,09   | 4034,7725 |
| <b>YWHAQ</b>   | 25003,89 | 24334,65 | 16469,41 | 11578,34 | 15856,9  | 14779,46 | 19346,5725 | 15318,18  | 4028,3925 |
| <b>SULT1A3</b> | 10275,29 | 8165,39  | 1822,45  | 2669,77  | 1144,54  | 2282,34  | 5733,225   | 1713,44   | 4019,785  |
| <b>KIF21B</b>  | 4497,51  | 2237,98  | 1596,18  | 18456,34 | 2019,02  | 3336,21  | 6697,0025  | 2677,615  | 4019,3875 |
| <b>AP2S1</b>   | 8699,02  | 5784,95  | 16787,15 | 10786,88 | 9569,55  | 3441,86  | 10514,5    | 6505,705  | 4008,795  |
| <b>CMPK1</b>   | 12657,25 | 6964,86  | 10067,52 | 14536,17 | 7753,57  | 6346,04  | 11056,45   | 7049,805  | 4006,645  |
| <b>SEPHS2</b>  | 11056,34 | 18566,75 | 20744,83 | 33535,4  | 8742,46  | 25200,67 | 20975,83   | 16971,565 | 4004,265  |
| <b>CCDC86</b>  | 7551,95  | 6177,8   | 5260,26  | 6809,75  | 3012,88  | 1892,84  | 6449,94    | 2452,86   | 3997,08   |
| <b>LYPLA2</b>  | 5718,88  | 6313,6   | 13303,81 | 6291,5   | 3751,06  | 4105,29  | 7906,9475  | 3928,175  | 3978,7725 |
| <b>SRSF5</b>   | 20682,21 | 29287,44 | 26472,84 | 13087,69 | 13832,36 | 22981,1  | 22382,545  | 18406,73  | 3975,815  |
| <b>NAP1L4</b>  | 13053,83 | 10968,09 | 12755,3  | 13456,27 | 6367,45  | 10800,86 | 12558,3725 | 8584,155  | 3974,2175 |
| <b>ITGA5</b>   | 8609,64  | 22270,32 | 4631     | 24771,75 | 12529,24 | 9667,6   | 15070,6775 | 11098,42  | 3972,2575 |
| <b>OSBPL6</b>  | 5423,59  | 320,83   | 1736,17  | 8490,68  | 35,07    | 22,28    | 3992,8175  | 28,675    | 3964,1425 |
| <b>SPTB</b>    | 2738,39  | 895,61   | 131,96   | 12110,33 | 15,28    | 12,33    | 3969,0725  | 13,805    | 3955,2675 |
| <b>KCTD15</b>  | 2860,31  | 3673,81  | 4957,11  | 4504,06  | 87,73    | 0        | 3998,8225  | 43,865    | 3954,9575 |
| <b>TNPO2</b>   | 7279,33  | 10774,79 | 7508,13  | 10561,4  | 3743,77  | 6409,01  | 9030,9125  | 5076,39   | 3954,5225 |
| <b>MATR3</b>   | 6775,2   | 12024,93 | 3416,28  | 7961,31  | 3123,52  | 4060,15  | 7544,43    | 3591,835  | 3952,595  |
| <b>PSTPIP2</b> | 9157,21  | 5857,08  | 4236,44  | 5617,61  | 741,98   | 3794,09  | 6217,085   | 2268,035  | 3949,05   |
| <b>RCC1</b>    | 13705,54 | 10688,74 | 9768,79  | 10946,95 | 7604,56  | 7056,49  | 11277,505  | 7330,525  | 3946,98   |

|                |          |          |          |          |          |          |            |           |           |
|----------------|----------|----------|----------|----------|----------|----------|------------|-----------|-----------|
| <b>FADS2</b>   | 44810,65 | 14489,85 | 55462,15 | 29669,07 | 13412,6  | 50915,43 | 36107,93   | 32164,015 | 3943,915  |
| <b>GNG2</b>    | 3362,61  | 6557,46  | 2356,83  | 7623,62  | 523,02   | 1544,25  | 4975,13    | 1033,635  | 3941,495  |
| <b>CD36</b>    | 3193,99  | 4,67     | 7188,72  | 20429,59 | 7497,82  | 28,52    | 7704,2425  | 3763,17   | 3941,0725 |
| <b>MRPL12</b>  | 12694,28 | 11039,87 | 12730,66 | 9549,71  | 12347,66 | 2780,46  | 11503,63   | 7564,06   | 3939,57   |
| <b>OTUD5</b>   | 9207,29  | 5809,73  | 7313,2   | 6880,77  | 2120,9   | 4606,5   | 7302,7475  | 3363,7    | 3939,0475 |
| <b>CCNL2</b>   | 9225,63  | 8351,19  | 18616,8  | 12050,76 | 10713,19 | 5532,05  | 12061,095  | 8122,62   | 3938,475  |
| <b>ACTR3</b>   | 17027,6  | 23203,65 | 14539,03 | 26960,77 | 16831,37 | 16165,81 | 20432,7625 | 16498,59  | 3934,1725 |
| <b>SLC12A7</b> | 4086,96  | 2352,3   | 13552,1  | 6144,33  | 174,62   | 5028,2   | 6533,9225  | 2601,41   | 3932,5125 |
| <b>KDM5D</b>   | 8897,65  | 0        | 0        | 6931,4   | 55,02    | 3,32     | 3957,2625  | 29,17     | 3928,0925 |
| <b>RBM4</b>    | 11312,45 | 9646,03  | 11307    | 6230,34  | 5842,89  | 5568,05  | 9623,955   | 5705,47   | 3918,485  |
| <b>SRSF7</b>   | 27492,13 | 20902,12 | 18963,64 | 13395,01 | 21257,11 | 11283,68 | 20188,225  | 16270,395 | 3917,83   |
| <b>PISD</b>    | 5155,8   | 6772,4   | 4900,93  | 7710,93  | 2353,96  | 2082,83  | 6135,015   | 2218,395  | 3916,62   |
| <b>HNRNPL</b>  | 42267,92 | 33574,27 | 30480,12 | 30971,97 | 35186,57 | 25631,65 | 34323,57   | 30409,11  | 3914,46   |
| <b>PSMB3</b>   | 13083,2  | 6405,72  | 13416,6  | 10331,1  | 8991,25  | 4820,14  | 10809,155  | 6905,695  | 3903,46   |
| <b>TMEM14B</b> | 4860,88  | 4605,43  | 11632,16 | 6462,54  | 3969,54  | 2004,98  | 6890,2525  | 2987,26   | 3902,9925 |
| <b>PPP5C</b>   | 7951,21  | 6702,16  | 9020,48  | 9011,95  | 3901,71  | 4637,29  | 8171,45    | 4269,5    | 3901,95   |
| <b>ID1</b>     | 943,35   | 1610,76  | 3930,48  | 17275,51 | 3491,6   | 588,45   | 5940,025   | 2040,025  | 3900      |
| <b>HDGF</b>    | 23259,89 | 28642,14 | 33328,42 | 42188,92 | 35494,99 | 20431,83 | 31854,8425 | 27963,41  | 3891,4325 |
| <b>ST3GAL4</b> | 6168,85  | 2543,3   | 4177,82  | 13016,31 | 2752,91  | 2419,92  | 6476,57    | 2586,415  | 3890,155  |
| <b>TSPAN4</b>  | 5828,3   | 6815,92  | 13777,08 | 5422,67  | 5017,72  | 3125,3   | 7960,9925  | 4071,51   | 3889,4825 |
| <b>DCAF7</b>   | 12423,58 | 18146,28 | 17483,15 | 17118,51 | 14186,63 | 10626,88 | 16292,88   | 12406,755 | 3886,125  |
| <b>PABPN1</b>  | 22935,23 | 18197,08 | 19910,17 | 15647,43 | 14136,46 | 16439,13 | 19172,4775 | 15287,795 | 3884,6825 |
| <b>PITRM1</b>  | 6380,6   | 7732,37  | 10818,2  | 7452,28  | 5206,99  | 3216,39  | 8095,8625  | 4211,69   | 3884,1725 |
| <b>MAVS</b>    | 11885,47 | 10804,15 | 10792,11 | 12830,66 | 6701,88  | 8688,48  | 11578,0975 | 7695,18   | 3882,9175 |
| <b>USP11</b>   | 9949,06  | 6148,35  | 12010,33 | 8780,81  | 1282,68  | 9397,52  | 9222,1375  | 5340,1    | 3882,0375 |
| <b>PGAM5</b>   | 6199,88  | 7715,58  | 6334,81  | 8531,96  | 2990,88  | 3637,59  | 7195,5575  | 3314,235  | 3881,3225 |
| <b>PLEKHM2</b> | 6067,04  | 5789,07  | 10860,64 | 11945,29 | 5036,3   | 4540,19  | 8665,51    | 4788,245  | 3877,265  |
| <b>FGFR3</b>   | 4138,86  | 3784,65  | 3370,61  | 4320,12  | 51,2     | 5,22     | 3903,56    | 28,21     | 3875,35   |
| <b>SAMD1</b>   | 8244,81  | 5941,24  | 8933,64  | 8514,21  | 3743,9   | 4323,59  | 7908,475   | 4033,745  | 3874,73   |
| <b>RBPMS2</b>  | 9181,2   | 2075,25  | 8413,66  | 172,73   | 5,95     | 2169,7   | 4960,71    | 1087,825  | 3872,885  |
| <b>ZPR1</b>    | 8578,55  | 5326,15  | 6034,6   | 11798,45 | 6131,88  | 1998,81  | 7934,4375  | 4065,345  | 3869,0925 |
| <b>CBWD1</b>   | 4634,46  | 3698,85  | 3060,2   | 29059,94 | 9228,15  | 3264,56  | 10113,3625 | 6246,355  | 3867,0075 |
| <b>IL27RA</b>  | 3706,37  | 2745,07  | 10014,27 | 4188,55  | 1078,58  | 1529,17  | 5163,565   | 1303,875  | 3859,69   |



|                 |          |          |          |          |          |          |            |           |           |
|-----------------|----------|----------|----------|----------|----------|----------|------------|-----------|-----------|
| <b>HMG3</b>     | 7423,46  | 4983,44  | 11485,86 | 8197,33  | 3022,1   | 5323,38  | 8022,5225  | 4172,74   | 3849,7825 |
| <b>COPS3</b>    | 11255,46 | 8623,78  | 7047,48  | 8452,83  | 6520,5   | 3470,85  | 8844,8875  | 4995,675  | 3849,2125 |
| <b>TBC1D4</b>   | 6937,31  | 7294,6   | 8594,28  | 5289,05  | 1400,81  | 4959,13  | 7028,81    | 3179,97   | 3848,84   |
| <b>TRIR</b>     | 10407,48 | 13537,37 | 16085,16 | 13803,37 | 12087,97 | 7132,09  | 13458,345  | 9610,03   | 3848,315  |
| <b>MAPK8IP3</b> | 4522,25  | 6808,93  | 11593,09 | 12026,28 | 5383,36  | 4427,07  | 8737,6375  | 4905,215  | 3832,4225 |
| <b>PML</b>      | 4428,41  | 8677,89  | 10526,22 | 8205,77  | 4364,97  | 3892,13  | 7959,5725  | 4128,55   | 3831,0225 |
| <b>NAPRT</b>    | 5273,32  | 502,52   | 7024,85  | 5964,49  | 314,47   | 1413,58  | 4691,295   | 864,025   | 3827,27   |
| <b>MRPS15</b>   | 6952,2   | 5029,23  | 11587,35 | 6435,87  | 4925,88  | 2425,7   | 7501,1625  | 3675,79   | 3825,3725 |
| <b>QARS1</b>    | 21145,98 | 20915,47 | 20916,2  | 13791,75 | 19052,24 | 11689,13 | 19192,35   | 15370,685 | 3821,665  |
| <b>THAP4</b>    | 5862,51  | 3009,47  | 14352,66 | 5586,6   | 5043,79  | 1721,03  | 7202,81    | 3382,41   | 3820,4    |
| <b>RRN3</b>     | 15004,9  | 5118,29  | 5179,09  | 7101,39  | 5642,28  | 2934,26  | 8100,9175  | 4288,27   | 3812,6475 |
| <b>ECI2</b>     | 3271,97  | 4679,05  | 7777,05  | 5900,15  | 1947,2   | 1273,63  | 5407,055   | 1610,415  | 3796,64   |
| <b>AGPAT4</b>   | 5030,28  | 1519,31  | 3331,28  | 9028,65  | 74,64    | 1789,14  | 4727,38    | 931,89    | 3795,49   |
| <b>PQBP1</b>    | 10819,88 | 4659,23  | 7261,83  | 6891,31  | 4971,12  | 2262,73  | 7408,0625  | 3616,925  | 3791,1375 |
| <b>PHF6</b>     | 6555,47  | 6031,63  | 3316,6   | 4968,9   | 2845,06  | 10,56    | 5218,15    | 1427,81   | 3790,34   |
| <b>PITHD1</b>   | 7477,16  | 4889,1   | 9280,73  | 7468,64  | 3192,01  | 3785,55  | 7278,9075  | 3488,78   | 3790,1275 |
| <b>CELF2</b>    | 10148,87 | 28230,52 | 8125,38  | 11665,68 | 9707,79  | 11803,68 | 14542,6125 | 10755,735 | 3786,8775 |
| <b>UMPS</b>     | 7791,2   | 8701,2   | 4908,27  | 1641,8   | 2365,9   | 1583,13  | 5760,6175  | 1974,515  | 3786,1025 |
| <b>XAB2</b>     | 6055,88  | 6511,53  | 7474,2   | 16945,5  | 6196,87  | 4725,56  | 9246,7775  | 5461,215  | 3785,5625 |
| <b>NPEPPS</b>   | 11621,12 | 13140,57 | 9956     | 14209,36 | 5786,92  | 11108,09 | 12231,7625 | 8447,505  | 3784,2575 |
| <b>FKBP8</b>    | 16151,14 | 25538,18 | 32272,53 | 20992,12 | 28777,64 | 11142,56 | 23738,4925 | 19960,1   | 3778,3925 |
| <b>DIPK1B</b>   | 10698,85 | 1909,11  | 12325,19 | 2524,92  | 3157,3   | 3025,89  | 6864,5175  | 3091,595  | 3772,9225 |
| <b>RPS6KB2</b>  | 7377,24  | 4726,76  | 7938,55  | 5970,45  | 2174,14  | 3293,74  | 6503,25    | 2733,94   | 3769,31   |
| <b>ATP5PB</b>   | 17896,64 | 13938,96 | 22742,07 | 21531,3  | 20891,97 | 9632,31  | 19027,2425 | 15262,14  | 3765,1025 |
| <b>LRPAP1</b>   | 7827,75  | 8355,97  | 8885,99  | 5022,57  | 4684,93  | 2846,51  | 7523,07    | 3765,72   | 3757,35   |
| <b>DDX3Y</b>    | 6507,53  | 0        | 0        | 8981,1   | 239,91   | 0        | 3872,1575  | 119,955   | 3752,2025 |
| <b>YOD1</b>     | 15284,11 | 3049,92  | 3003,49  | 8159,58  | 2391,4   | 4868,96  | 7374,275   | 3630,18   | 3744,095  |
| <b>FTSJ3</b>    | 7750,05  | 6432,25  | 8274,4   | 7347,14  | 5553,05  | 1867,8   | 7450,96    | 3710,425  | 3740,535  |
| <b>PPT2</b>     | 3546,38  | 4288,13  | 6468,34  | 5464,18  | 1072,92  | 1333,57  | 4941,7575  | 1203,245  | 3738,5125 |
| <b>ERCC1</b>    | 6468,15  | 6915,69  | 15453,24 | 8759,02  | 7071,71  | 4251,66  | 9399,025   | 5661,685  | 3737,34   |
| <b>TANC1</b>    | 3325,39  | 5733,04  | 7224,42  | 7598,36  | 401,98   | 4064,09  | 5970,3025  | 2233,035  | 3737,2675 |
| <b>MDH2</b>     | 16634,6  | 18711,25 | 22392,31 | 14563,69 | 20371,38 | 8309,47  | 18075,4625 | 14340,425 | 3735,0375 |
| <b>SCAP</b>     | 9351,47  | 11539,17 | 13070,97 | 6877,12  | 5615,07  | 7353,86  | 10209,6825 | 6484,465  | 3725,2175 |

|                 |          |          |           |          |           |          |            |           |           |
|-----------------|----------|----------|-----------|----------|-----------|----------|------------|-----------|-----------|
| <b>ROBO2</b>    | 6499,37  | 2759,85  | 4750,73   | 1465,72  | 270,59    | 21,45    | 3868,9175  | 146,02    | 3722,8975 |
| <b>ATP6V0B</b>  | 10391,72 | 6564,72  | 10659,09  | 8342,12  | 6016,71   | 4518,85  | 8989,4125  | 5267,78   | 3721,6325 |
| <b>LIF</b>      | 2575,22  | 862,19   | 2649,2    | 8877,73  | 14,28     | 25,32    | 3741,085   | 19,8      | 3721,285  |
| <b>AAMP</b>     | 9317,97  | 9547,12  | 13387,86  | 9850,35  | 7742,18   | 5897,87  | 10525,825  | 6820,025  | 3705,8    |
| <b>TOR3A</b>    | 10755,19 | 6754,98  | 3432,33   | 5378,46  | 2254,95   | 3497,77  | 6580,24    | 2876,36   | 3703,88   |
| <b>TNKS1BP1</b> | 3391,24  | 6848,99  | 5945,06   | 9579,68  | 3156,32   | 2320,24  | 6441,2425  | 2738,28   | 3702,9625 |
| <b>LRBA</b>     | 9766,54  | 5658,55  | 10268,92  | 7630,86  | 3103,59   | 6179,99  | 8331,2175  | 4641,79   | 3689,4275 |
| <b>MYBBP1A</b>  | 5589,37  | 12636,13 | 17757,51  | 9524,21  | 13809,91  | 1565,68  | 11376,805  | 7687,795  | 3689,01   |
| <b>RPS6KA1</b>  | 8689,33  | 15382,9  | 12072,11  | 16742,2  | 14170,23  | 4898,6   | 13221,635  | 9534,415  | 3687,22   |
| <b>TMED2</b>    | 12901,47 | 12972,91 | 11256,89  | 16515,96 | 8225,4    | 11226,47 | 13411,8075 | 9725,935  | 3685,8725 |
| <b>TNS4</b>     | 0        | 4700,42  | 628,33    | 10388,5  | 0         | 499,22   | 3929,3125  | 249,61    | 3679,7025 |
| <b>NMU</b>      | 2786,69  | 3311,92  | 1761,85   | 6855,15  | 0         | 5        | 3678,9025  | 2,5       | 3676,4025 |
| <b>SLFN11</b>   | 6531,69  | 1,1      | 5198,88   | 6643,4   | 1815,39   | 24,81    | 4593,7675  | 920,1     | 3673,6675 |
| <b>NAA10</b>    | 5836,67  | 4640,65  | 7504,37   | 9177,81  | 4193,13   | 2049,02  | 6789,875   | 3121,075  | 3668,8    |
| <b>ATP1B3</b>   | 15867,72 | 5596,02  | 8445,65   | 6002,96  | 5281,35   | 5349,52  | 8978,0875  | 5315,435  | 3662,6525 |
| <b>CD4</b>      | 10988,73 | 6242,09  | 16435,53  | 7010,16  | 12935,99  | 80,64    | 10169,1275 | 6508,315  | 3660,8125 |
| <b>SLC5A6</b>   | 9123,85  | 6436,6   | 3637,59   | 3474,4   | 2170,95   | 1843,7   | 5668,11    | 2007,325  | 3660,785  |
| <b>COLGALT1</b> | 8500,54  | 12543,36 | 7517,81   | 23978,88 | 10319,44  | 8633,37  | 13135,1475 | 9476,405  | 3658,7425 |
| <b>NOMO1</b>    | 13172,74 | 9413,79  | 24766,99  | 13536,98 | 9199,92   | 13935,91 | 15222,625  | 11567,915 | 3654,71   |
| <b>VAT1</b>     | 5232,12  | 10628,81 | 21926,57  | 8848,09  | 11247,17  | 4766,52  | 11658,8975 | 8006,845  | 3652,0525 |
| <b>BCAT2</b>    | 3539,6   | 5390,73  | 9652,58   | 4842,65  | 3030,48   | 1383,54  | 5856,39    | 2207,01   | 3649,38   |
| <b>NECAP2</b>   | 4150,41  | 6025,07  | 9156,43   | 8812,55  | 4053,51   | 2724,53  | 7036,115   | 3389,02   | 3647,095  |
| <b>ZNF598</b>   | 6633,76  | 8429,48  | 5395,48   | 8662,54  | 5110,29   | 2157,22  | 7280,315   | 3633,755  | 3646,56   |
| <b>USP7</b>     | 12447,91 | 11788,09 | 4978,83   | 20279,57 | 7297,22   | 10162,82 | 12373,6    | 8730,02   | 3643,58   |
| <b>RPL14</b>    | 99628,03 | 91620,73 | 129339,83 | 55753,32 | 141909,81 | 38983,2  | 94085,4775 | 90446,505 | 3638,9725 |
| <b>TSR1</b>     | 6166,8   | 12141,49 | 9802,72   | 7710,88  | 8239,58   | 2397,01  | 8955,4725  | 5318,295  | 3637,1775 |
| <b>MCUR1</b>    | 6778,8   | 3071,38  | 7678,46   | 5761,32  | 3016,79   | 1387,98  | 5822,49    | 2202,385  | 3620,105  |
| <b>CPPED1</b>   | 7382,32  | 3748,62  | 5729,02   | 12498,9  | 4960,49   | 2479,33  | 7339,715   | 3719,91   | 3619,805  |
| <b>SLC6A8</b>   | 25917,29 | 10861,12 | 6984,17   | 25709,66 | 26741     | 762,68   | 17368,06   | 13751,84  | 3616,22   |
| <b>RIPOR3</b>   | 8395,05  | 74,3     | 5978,14   | 6654,15  | 12,46     | 3315,78  | 5275,41    | 1664,12   | 3611,29   |
| <b>RBBP7</b>    | 24213,44 | 11637    | 10559,13  | 11194,84 | 6889,95   | 14692,94 | 14401,1025 | 10791,445 | 3609,6575 |
| <b>SF3A3</b>    | 14225,26 | 10484,67 | 14805,14  | 14476,49 | 9960,15   | 9816,38  | 13497,89   | 9888,265  | 3609,625  |
| <b>NSMF</b>     | 6628,43  | 6161,96  | 2738,93   | 6010,71  | 3153,76   | 399,23   | 5385,0075  | 1776,495  | 3608,5125 |

|                 |          |          |          |          |          |          |            |          |           |
|-----------------|----------|----------|----------|----------|----------|----------|------------|----------|-----------|
| <b>PTPA</b>     | 7793,93  | 10330,13 | 12109,1  | 8245,38  | 6682,94  | 5362,46  | 9619,635   | 6022,7   | 3596,935  |
| <b>RANBP1</b>   | 23137,72 | 16601,28 | 10862,55 | 12304,01 | 13319,64 | 10945,72 | 15726,39   | 12132,68 | 3593,71   |
| <b>EIF3D</b>    | 27707,21 | 34145,99 | 21132,38 | 20077,77 | 32662,58 | 11685,32 | 25765,8375 | 22173,95 | 3591,8875 |
| <b>CD33</b>     | 5048,26  | 7468,54  | 8800,16  | 7613,93  | 4783,19  | 2519,66  | 7232,7225  | 3651,425 | 3581,2975 |
| <b>DAG1</b>     | 4973,59  | 7415,38  | 7376,81  | 4955,01  | 993,06   | 4206,31  | 6180,1975  | 2599,685 | 3580,5125 |
| <b>KIFAP3</b>   | 16919,91 | 2917,45  | 4043,88  | 3828,72  | 1131,7   | 5569,84  | 6927,49    | 3350,77  | 3576,72   |
| <b>CENPV</b>    | 7494,5   | 6612,32  | 5458,06  | 1306,65  | 1409,32  | 1873,85  | 5217,8825  | 1641,585 | 3576,2975 |
| <b>SEPTIN8</b>  | 3367,41  | 4652,64  | 2664,9   | 18638,94 | 2553,81  | 4955,61  | 7330,9725  | 3754,71  | 3576,2625 |
| <b>SELENBP1</b> | 4738,95  | 267,85   | 9255,7   | 57,36    | 6,67     | 7,2      | 3579,965   | 6,935    | 3573,03   |
| <b>CPSF6</b>    | 8989,61  | 13766,7  | 16328,04 | 9380,99  | 8518,89  | 8572,88  | 12116,335  | 8545,885 | 3570,45   |
| <b>SIN3B</b>    | 4626,17  | 4809,15  | 7571,77  | 8703,21  | 2546,33  | 3168,32  | 6427,575   | 2857,325 | 3570,25   |
